# Supplementary material for: Metabolomic Aspects of Conservative and Resistance-related Elements of Response to <em>Fusarium culmorum</em> in the Grass Family
Source: Preprints.org preprint supplement (doi:10.20944/preprints202207.0378.v1), 2022-07-26
Supplement: Supplementary file 2 [file table S1.xlsx]

## Sheet: Arkusz1
							Bd21		Hs		Hr		Ts		Tr
nrorg	row_m_z	ionization mode	retention_time	name	formula	fragmentation MS/MS	T1	T2	T1	T2	T1	T2	T1	T2	T1	T2
10522	317.147	negative	6.579	zearalenone	C18H22O5	nd	12.6366	14.5886	23.0779	23.5093	3.63107	3.72029	26.4259	28.4834	5.27947	3.69861
2637	371.134	negative	2.753	nivalenol	C15H20O7	108.04394:80 128.07016:70 154.06436:104 178.98271:64 191.60741:92 201.95113:64 208.98512:76 256.13083:62 268.20239:82	10.1553	10.8489	11.7866	9.95618	5.86753	8.72741	17.6095	16.4563	4.59344	6.65692
4121	384.202	positive	4.952	acetoxyscirpenol	C19H26O7	109.02858:60 130.09781:94 176.06915:204 196.11563:54 219.14166:60 237.11212:60 269.12088:156 287.08197:58 311.14078:58 333.62592:64 380.19009:504	10.818	11.3095	14.8778	15.5234	6.33508	4.08758	9.66678	10.6016	0.369207	0.836335
2255	355.139	negative	8.967	deoxynivalenol	C15H20O6	95.08557:420 103.05405:82 107.08521:220 117.06966:258 133.10085:56 141.06985:112 148.07397:246 158.063:76 169.10178:58 173.13177:148 177.12703:116 187.11153:74 191.17867:466 249.19325:60 260.16376:586	12.5789	12.0679	15.1224	11.1591	1.47808	1.97999	15.0501	15.3235	4.00955	2.11438
5985	484.255	positive	10.175	T2 toxin	C24H34O9	93.32367:60 120.08005:3030 145.05052:80 157.96744:88 183.06216:54 224.98981:60 502.33453:56 504.26611:228	11.1138	11.8788	10.5656	9.28919	0.266703	0.328369	10.9077	9.71217	1.87882	1.49986
