# Supplementary material for: Metabolomic Aspects of Conservative and Resistance-related Elements of Response to <em>Fusarium culmorum</em> in the Grass Family
Source: Preprints.org preprint supplement (doi:10.20944/preprints202207.0378.v1), 2022-07-26
Supplement: Supplementary file 3 [file table S3.xlsx]

## Sheet: pathways enrichment
common T2				Hs T2				Hr T2				Ts T2				Tr T2				Bd21 T2				common T1				Hs T1				Hr T1				Ts 1				Tr T1				Bd21 T1
pathway enriched KEGG	Hits	FDR	Impact	pathway enriched KEGG	Hits	FDR	Impact	pathway enriched KEGG	Hits	FDR	Impact	pathway enriched KEGG	Hits	FDR	Impact	pathway enriched KEGG	Hits	FDR	Impact	pathway enriched KEGG	Hits	FDR	Impact	pathway enriched KEGG	Hits	FDR	Impact	pathway enriched KEGG	Hits	FDR	Impact	pathway enriched KEGG	Hits	FDR	Impact	pathway enriched KEGG	Hits	FDR	Impact	pathway enriched KEGG	Hits	FDR	Impact	pathway enriched KEGG	Hits	FDR	Impact
Galactose metabolism	17	0.021833	0.81455	Biosynthesis of secondary metabolites - other antibiotics	4	0.0052526	1	Caffeine metabolism	2	0.20058	0	Arachidonic acid metabolism	6	0.079147	0	Biosynthesis of secondary metabolites - other antibiotics	6	2.96e-08	1	Phenylpropanoid biosynthesis	6	0.36313	0.14614	Galactose metabolism	21	7.3e-08	0.85565	Biosynthesis of secondary metabolites - other antibiotics	4	0.0094	1	Arginine and proline metabolism	3	0.38398	0.14261	Biosynthesis of secondary metabolites - other antibiotics	4	0.045166	0	Flavonoid biosynthesis	14	7.3333e-05	0.3078	Amino sugar and nucleotide sugar metabolism	9	0.011899	0.42445
Ascorbate and aldarate metabolism	12	0.029945	0.79104	Diterpenoid biosynthesis	8	0.031379	0.32289	2-Oxocarboxylic acid metabolism	2	0.20058	0	Diterpenoid biosynthesis	13	0.079147	0.44591	Cutin, uberine and wax biosynthesis	5	0.0010124	0.5	Purine metabolism	8	0.36313	0.34992	Porphyrin and chlorophyll metabolism	24	0.00040985	0.66404	Galactose metabolism	7	0.015402	0.34305	2-Oxocarboxylic acid metabolism	2	0.38398	0	Arachidonic acid metabolism	5	0.065237	0	Flavone and flavonol biosynthesis	6	0.0024453	0	Glycolysis / Gluconeogenesis	6	0.017968	0.12717
Porphyrin and chlorophyll metabolism	24	0.029945	0.74892	alpha-Linolenic acid metabolism	6	0.031379	0.31794	Purine metabolism	3	0.44981	0.00569	Valine, leucine and isoleucine biosynthesis	7	0.27438	0.26221	Linoleic acid metabolism	3	0.0024718	1	Linoleic acid metabolism	2	0.38307	0	Flavonoid biosynthesis	22	0.0036935	0.30014	Ascorbate and aldarate metabolism	5	0.046147	0.39552	Phenylpropanoid biosynthesis	3	0.38398	0.08112	Caffeine metabolism	4	0.16446	0	Arachidonic acid metabolism	5	0.020923	0	alpha-Linolenic acid metabolism	6	0.017968	0.28064
Arachidonic acid metabolism	9	0.029945	0	Arachidonic acid metabolism	3	0.35222	0	One carbon pool by folate	1	1	0	Ubiquinone and other terpenoid-quinone biosynthesis	9	0.27438	0.1769	Biosynthesis of unsaturated fatty acids	4	0.061831	0	Flavone and flavonol biosynthesis	3	0.38307	0	Phenylpropanoid biosynthesis	17	0.009922	0.34891	alpha-Linolenic acid metabolism	6	0.046147	0.31794	Histidine metabolism	2	0.40806	0.12403	Amino sugar and nucleotide sugar metabolism	9	0.31111	0.42823	Phenylpropanoid biosynthesis	8	0.037347	0.247	Pentose phosphate pathway	5	0.017968	0.22522
2-Oxocarboxylic acid metabolism	8	0.14229	0	Ascorbate and aldarate metabolism	3	0.85985	0.21642	Sphingolipid metabolism	1	1	0.22596	Phenylpropanoid biosynthesis	9	0.27438	0.19572	Arachidonic acid metabolism	3	0.069839	0	Flavonoid biosynthesis	5	1	0.02606	Tyrosine metabolism	10	0.036363	0.61893	Diterpenoid biosynthesis	8	0.046147	0.32289	Cysteine and methionine metabolism	3	0.40806	0.02677	Linoleic acid metabolism	2	0.62552	0	alpha-Linolenic acid metabolism	5	0.57269	0.28064	Fructose and mannose metabolism	5	0.018564	0.53233
Tryptophan metabolism	12	0.25245	0.55173	Citrate cycle (TCA cycle)	3	0.93851	0.20817	Tryptophan metabolism	1	1	0	Brassinosteroid biosynthesis	6	0.33301	0.46296	Galactose metabolism	3	0.49715	0.09582	Pantothenate and CoA biosynthesis	3	1	0.06048	Isoquinoline alkaloid biosynthesis	5	0.039914	0.99999	Fructose and mannose metabolism	4	0.28739	0.10854	Arginine biosynthesis	2	0.40806	0.14563	Pentose phosphate pathway	4	0.78311	0.33914	Starch and sucrose metabolism	4	0.6526	0.03865	Citrate cycle (TCA cycle)	4	0.12295	0.30472
Phenylpropanoid biosynthesis	16	0.34669	0.34784	Tryptophan metabolism	3	1	0.24138	Folate biosynthesis	1	1	0	Galactose metabolism	7	0.34174	0.2766	alpha-Linolenic acid metabolism	3	0.49715	0.23801	Stilbenoid, diarylheptanoid and gingerol biosynthesis	2	1	0.11458	Valine, leucine and isoleucine biosynthesis	11	0.046494	0.52324	Arachidonic acid metabolism	3	0.29816	0	Alanine, aspartate and glutamate metabolism	2	0.51039	1	Fructose and mannose metabolism	4	0.78311	0.53233	Phenylalanine, tyrosine and tryptophan biosynthesis	4	0.6526	0.28178	Galactose metabolism	4	0.30448	0.0411
One carbon pool by folate	5	0.54004	0.76191	Stilbenoid, diarylheptanoid and gingerol biosynthesis	2	1	0.13542	Valine, leucine and isoleucine degradation	1	1	0.02755	alpha-Linolenic acid metabolism	7	0.34174	0.50089	Nicotinate and nicotinamide metabolism	2	0.57499	0.0202	Riboflavin metabolism	2	1	0.38519	Flavone and flavonol biosynthesis	7	0.0806	0	Citrate cycle (TCA cycle)	3	1	0.20817	Monobactam biosynthesis	1	1	0	Diterpenoid biosynthesis	7	0.78311	0.08856	Biosynthesis of secondary metabolites - other antibiotics	2	0.6526	0	Inositol phosphate metabolism	4	0.30448	0.04602
Anthocyanin biosynthesis	4	0.54004	0	Glutathione metabolism	3	1	0	Diterpenoid biosynthesis	1	1	0	Ascorbate and aldarate metabolism	5	0.5001	0.38806	Diterpenoid biosynthesis	3	1	0.07133	Phenylalanine metabolism	2	1	0	Starch and sucrose metabolism	10	0.1269	0.74088	Stilbenoid, diarylheptanoid and gingerol biosynthesis	2	1	0.13542	Lysine biosynthesis	1	1	0.22973	Anthocyanin biosynthesis	2	0.78311	0	Cutin, suberine and wax biosynthesis	3	0.6526	0.25	Glyoxylate and dicarboxylate metabolism	4	0.30448	0.17761
Biosynthesis of secondary metabolites - other antibiotics	4	0.54004	0	Terpenoid backbone biosynthesis	3	1	0.02733					Linoleic acid metabolism	2	0.64562	0	Riboflavin metabolism	1	1	0.11852	2-Oxocarboxylic acid metabolism	2	1	0	Fructose and mannose metabolism	9	0.17448	0.64087	Tryptophan metabolism	3	1	0.24138	Nitrogen metabolism	1	1	0	Glycolysis , Gluconeogenesis	4	1	0.12679	One carbon pool by folate	2	0.90701	0.21429	Carbon fixation in photosynthetic organisms	3	0.41443	0.09102
Starch and sucrose metabolism	10	0.54004	0.54099	Glyoxylate and dicarboxylate metabolism	3	1	0.13764					Lysine biosynthesis	3	0.64921	0.36486	Flavone and flavonol biosynthesis	1	1	0	Cutin, suberine and wax biosynthesis	2	1	0.25	C5-Branched dibasic acid metabolism	4	0.19995	0.5	Glutathione metabolism	3	1	0	Cutin, suberine and wax biosynthesis	1	1	1	Histidine metabolism	3	1	0.04264	Caffeine metabolism	2	1	0	Phenylalanine, tyrosine and tryptophan biosynthesis	3	0.41443	0.0981
Phenylalanine, tyrosine and tryptophan biosynthesis	10	0.54004	0.54555	Lysine degradation	2	1	0.25					Phenylalanine, tyrosine and tryptophan biosynthesis	5	0.7915	0.29079	Histidine metabolism	1	1	0.07752	Diterpenoid biosynthesis	4	1	0.00276	Ascorbate and aldarate metabolism	8	0.19995	0.42537	Terpenoid backbone biosynthesis	3	1	0.02733	Sulfur metabolism	1	1	0.07459	Galactose metabolism	4	1	0.0411	Fructose and mannose metabolism	3	1	0.10854	Alanine, aspartate and glutamate metabolism	3	0.41443	0.11511
Linoleic acid metabolism	3	0.54004	1	Phenylpropanoid biosynthesis	3	1	0.11437					Stilbenoid, diarylheptanoid and gingerol biosynthesis	3	0.90966	0.22916	Lysine degradation	1	1	0.25	Histidine metabolism	2	1	0.04264	Arachidonic acid metabolism	6	0.19995	0	Glyoxylate and dicarboxylate metabolism	3	1	0.13764	Butanoate metabolism	1	1	0	Tyrosine metabolism	3	1	0.17027	Zeatin biosynthesis	3	1	0.01356	Starch and sucrose metabolism	3	0.41443	0.22197
Cutin, suberine and wax biosynthesis	7	0.54004	0.75	Zeatin biosynthesis	2	1	0.00678					Carotenoid biosynthesis	7	1	0.07491	Citrate cycle (TCA cycle)	1	1	0.05428	Lysine degradation	2	1	0	Amino sugar and nucleotide sugar metabolism	17	0.19995	0.42823	Lysine degradation	2	1	0.25	Biosynthesis of unsaturated fatty acids	1	1	0	Lysine degradation	3	1	0.25	Riboflavin metabolism	2	1	0.27408	Caffeine metabolism	2	0.41443	0
Flavonoid biosynthesis	18	0.63721	0.33425	Biosynthesis of unsaturated fatty acids	2	1	0					Biosynthesis of unsaturated fatty acids	4	1	0	Starch and sucrose metabolism	1	1	0	beta-Alanine metabolism	2	1	0.12698	Phenylalanine, tyrosine and tryptophan biosynthesis	9	0.19995	0.22221	Amino sugar and nucleotide sugar metabolism	4	1	0	Fatty acid elongation	1	1	0	Inositol phosphate metabolism	4	1	0.04602	2-Oxocarboxylic acid metabolism	2	1	0	2-Oxocarboxylic acid metabolism	2	0.52771	0
Lysine degradation	8	0.63721	0.5	Valine, leucine and isoleucine biosynthesis	2	1	0.09297					Tryptophan metabolism	4	1	0.06897	Valine, leucine and isoleucine biosynthesis	1	1	0.02145	Biosynthesis of secondary metabolites - unclassified	1	1	0	Alanine, aspartate and glutamate metabolism	9	0.19995	0.72302	Phenylpropanoid biosynthesis	3	1	0.11437	Tryptophan metabolism	1	1	0	Citrate cycle (TCA cycle)	3	1	0.20817	Diterpenoid biosynthesis	5	1	0.01275	Phosphatidylinositol signaling system	3	0.52771	0.0026
Arginine biosynthesis	8	0.63721	0.50971	Pantothenate and CoA biosynthesis	2	1	0.01296					Porphyrin and chlorophyll metabolism	7	1	0.23132	Pyruvate metabolism	1	1	0.06346	Pyrimidine metabolism	3	1	0.07398	Linoleic acid metabolism	3	0.19995	1	Zeatin biosynthesis	2	1	0.00678	Cyanoamino acid metabolism	1	1	0	Vitamin B6 metabolism	2	1	0.23718	Linoleic acid metabolism	1	1	1	Ascorbate and aldarate metabolism	2	0.94207	0.33582
Carotenoid biosynthesis	16	0.63721	0.63322	One carbon pool by folate	1	1	0					Steroid biosynthesis	6	1	0.06509	Thiamine metabolism	1	1	0.11561	Phenylalanine, tyrosine and tryptophan biosynthesis	2	1	0.05405	Pentose phosphate pathway	8	0.20843	0.30106	Biosynthesis of unsaturated fatty acids	2	1	0	Galactose metabolism	1	1	0.01838	2-Oxocarboxylic acid metabolism	2	1	0	Galactose metabolism	3	1	0.30313	Valine, leucine and isoleucine degradation	3	1	0.02755
alpha-Linolenic acid metabolism	11	0.63721	0.59147	Sesquiterpenoid and triterpenoid biosynthesis	1	1	0					Caffeine metabolism	2	1	0	Fatty acid elongation	1	1	0	Starch and sucrose metabolism	2	1	0.10163	Butanoate metabolism	7	0.29949	0.22727	Valine, leucine and isoleucine biosynthesis	2	1	0.09297	Glutathione metabolism	1	1	0.05016	Phenylalanine, tyrosine and tryptophan biosynthesis	3	1	0.12813	Limonene and pinene degradation	1	1	0	Valine, leucine and isoleucine biosynthesis	2	1	0
Caffeine metabolism	5	0.63721	0	Porphyrin and chlorophyll metabolism	3	1	0.05768					Riboflavin metabolism	2	1	0.2963	Pantothenate and CoA biosynthesis	1	1	0	Tropane, piperidine and pyridine alkaloid biosynthesis	1	1	0	Tropane, piperidine and pyridine alkaloid biosynthesis	4	0.36559	0	Starch and sucrose metabolism	2	1	0.31871	Glyoxylate and dicarboxylate metabolism	1	1	0.0531	Starch and sucrose metabolism	3	1	0.22197	Monoterpenoid biosynthesis	1	1	0	Tryptophan metabolism	2	1	0.17241
Betalain biosynthesis	2	0.92436	1	Nitrogen metabolism	1	1	0					Fructose and mannose metabolism	3	1	0.03695	Glycolysis / Gluconeogenesis	1	1	0.11077	Lysine biosynthesis	1	1	0	Glycolysis / Gluconeogenesis	9	0.44378	0.3679	Pantothenate and CoA biosynthesis	2	1	0.01296	Terpenoid backbone biosynthesis	1	1	0.0672	Tryptophan metabolism	3	1	0.41379	Cysteine and methionine metabolism	4	1	0.13288	Aminoacyl-tRNA biosynthesis	3	1	0
Isoquinoline alkaloid biosynthesis	3	0.99635	0.99999	Flavone and flavonol biosynthesis	1	1	0					2-Oxocarboxylic acid metabolism	2	1	0	Phenylpropanoid biosynthesis	1	1	0.02575	alpha-Linolenic acid metabolism	2	1	0	Phenylalanine metabolism	5	0.4438	0.96154	One carbon pool by folate	1	1	0	Glycine, serine and threonine metabolism	1	1	0	Nicotinate and nicotinamide metabolism	2	1	0.26667	Purine metabolism	5	1	0.1158	Porphyrin and chlorophyll metabolism	3	1	0.1355
Lysine biosynthesis	4	0.99635	0.51351	Glycine, serine and threonine metabolism	2	1	0					Limonene and pinene degradation	1	1	0	Fatty acid degradation	1	1	0	Galactose metabolism	2	1	0.07744	Lysine biosynthesis	4	0.47565	0.51351	Sesquiterpenoid and triterpenoid biosynthesis	1	1	0	Fatty acid degradation	1	1	0	Phenylpropanoid biosynthesis	4	1	0.05193	Sesquiterpenoid and triterpenoid biosynthesis	1	1	0	Arginine and proline metabolism	2	1	0.09799
Flavone and flavonol biosynthesis	5	0.99635	0	Cutin, suberine and wax biosynthesis	1	1	0.25					Flavonoid biosynthesis	6	1	0.05282	Valine, leucine and isoleucine degradation	1	1	0.00991	Aminoacyl-tRNA biosynthesis	3	1	0	Betalain biosynthesis	2	0.49354	1	Glycolysis / Gluconeogenesis	2	1	0.00114	Carotenoid biosynthesis	1	1	0	Phosphatidylinositol signaling system	3	1	0.0026	Amino sugar and nucleotide sugar metabolism	4	1	0	Riboflavin metabolism	1	1	0.11852
Pyrimidine metabolism	13	1	0.37099	Histidine metabolism	1	1	0.12403					Starch and sucrose metabolism	3	1	0.1113	Fatty acid biosynthesis	1	1	0.01123	Arginine biosynthesis	1	1	0	Pentose and glucuronate interconversions	6	0.55579	0.21429	Porphyrin and chlorophyll metabolism	3	1	0.05768	Aminoacyl-tRNA biosynthesis	1	1	0	Taurine and hypotaurine metabolism	1	1	0	Lysine biosynthesis	1	1	0.09459	Pentose and glucuronate interconversions	1	1	0
Pantothenate and CoA biosynthesis	8	1	0.48597	Carotenoid biosynthesis	2	1	0					Cutin, suberine and wax biosynthesis	2	1	0					Tyrosine metabolism	1	1	0	Sphingolipid metabolism	6	0.55579	0.46634	Nitrogen metabolism	1	1	0	Porphyrin and chlorophyll metabolism	1	1	0	Isoquinoline alkaloid biosynthesis	1	1	0	Stilbenoid, diarylheptanoid and gingerol biosynthesis	1	1	0.11458	Butanoate metabolism	1	1	0
Fructose and mannose metabolism	7	1	0.17782	Pentose phosphate pathway	1	1	0					Pantothenate and CoA biosynthesis	3	1	0.02808					Pentose phosphate pathway	1	1	0.00229	Glyoxylate and dicarboxylate metabolism	9	0.58581	0.29926	Flavone and flavonol biosynthesis	1	1	0	Fatty acid biosynthesis	1	1	0.01123	Terpenoid backbone biosynthesis	3	1	0.12293	Vitamin B6 metabolism	1	1	0.55128	Sphingolipid metabolism	1	1	0.03365
Folate biosynthesis	9	1	0.20174	Fructose and mannose metabolism	1	1	0					Taurine and hypotaurine metabolism	1	1	0					Propanoate metabolism	1	1	0.03259	Glycine, serine and threonine metabolism	10	0.58581	0.3936	Glycine, serine and threonine metabolism	2	1	0					Glyoxylate and dicarboxylate metabolism	3	1	0.13764	Folate biosynthesis	2	1	0	Histidine metabolism	1	1	0.13566
Riboflavin metabolism	4	1	0.64445	Brassinosteroid biosynthesis	1	1	0					Monoterpenoid biosynthesis	1	1	0					Zeatin biosynthesis	1	1	0	Cyanoamino acid metabolism	8	0.63032	0.58929	Cutin, suberine and wax biosynthesis	1	1	0.25					Ascorbate and aldarate metabolism	2	1	0.15672	Selenocompound metabolism	1	1	0.20168	Arginine biosynthesis	1	1	0
Amino sugar and nucleotide sugar metabolism	15	1	0.16925	Cysteine and methionine metabolism	2	1	0					Isoquinoline alkaloid biosynthesis	1	1	0.41176					Carbon fixation in photosynthetic organisms	1	1	0.02012	Pyrimidine metabolism	11	0.63032	0.28654	Histidine metabolism	1	1	0.12403					Arginine biosynthesis	2	1	0.22913	Ubiquinone and other terpenoid-quinone biosynthesis	2	1	0	beta-Alanine metabolism	1	1	0
Cyanoamino acid metabolism	8	1	0.33929	Aminoacyl-tRNA biosynthesis	2	1	0					C5-Branched dibasic acid metabolism	1	1	0.5					Cysteine and methionine metabolism	2	1	0.03189	Vitamin B6 metabolism	4	0.64267	0.17307	Pentose phosphate pathway	1	1	0					Sesquiterpenoid and triterpenoid biosynthesis	1	1	0	Histidine metabolism	1	1	0	Biotin metabolism	1	1	0.09231
Nicotinate and nicotinamide metabolism	4	1	0.44243	Phenylalanine, tyrosine and tryptophan biosynthesis	1	1	0					Amino sugar and nucleotide sugar metabolism	6	1	0					Alanine, aspartate and glutamate metabolism	1	1	0	Monobactam biosynthesis	3	0.74369	1	Carotenoid biosynthesis	2	1	0					Cysteine and methionine metabolism	4	1	0.10858	Lysine degradation	1	1	0	Glycerolipid metabolism	1	1	0
Taurine and hypotaurine metabolism	2	1	0	Cyanoamino acid metabolism	1	1	0					Glycine, suberine and wax biosynthesis	4	1	0.18658					Thiamine metabolism	1	1	0	Caffeine metabolism	3	1	0	Brassinosteroid biosynthesis	1	1	0					Zeatin biosynthesis	2	1	0.01356	Pentose phosphate pathway	1	1	0.00229	Thiamine metabolism	1	1	0.00578
Monoterpenoid biosynthesis	2	1	0	Arginine and proline metabolism	1	1	0					Cyanoamino acid metabolism	3	1	0.33929					Valine, leucine and isoleucine biosyn	1	1	0.05721	Monoterpenoid biosynthesis	2	1	0	Phenylalanine, tyrosine and tryptophan biosynthesis	1	1	0					Biosynthesis of unsaturated fatty acids	2	1	0	Carbon fixation in photosynthetic organisms	1	1	0.02012	Pyruvate metabolism	1	1	0.00962
Pentose and glucuronate interconversions	5	1	0.21429	Ubiquinone and other terpenoid-quinone biosynthesis	1	1	0					Pentose and glucuronate interconversions	2	1	0.21429					Porphyrin and chlorophyll metabolism	2	1	0.03664	Biosynthesis of secondary metabolites - other antibiotics	2	1	0	Cysteine and methionine metabolism	2	1	0					N-Glycan biosynthesis	3	1	0.07466	Biosynthesis of unsaturated fatty acids	1	1	0	Cyanoamino acid metabolism	1	1	0.125
Sphingolipid metabolism	5	1	0.26923	N-Glycan biosynthesis	1	1	0					Folate biosynthesis	3	1	0.11317					Cyanoamino acid metabolism	1	1	0	Sulfur metabolism	4	1	0.07735	Aminoacyl-tRNA biosynthesis	2	1	0					Ubiquinone and other terpenoid-quinone biosynthesis	3	1	0.10839	Valine, eucine and isoleucine biosynthesis	1	1	0.05721	Terpenoid backbone biosynthesis	1	1	0.0376
Tyrosine metabolism	5	1	0.31352	Valine, leucine and isoleucine degradation	1	1	0					Monobactam biosynthesis	1	1	0					Phosphatidylinositol signaling system	1	1	0.12584	Stilbenoid, diarylheptanoid and gingerol biosynthesis	3	1	0.27084	Cyanoamino acid metabolism	1	1	0					Purine metabolism	5	1	0.10816	Carotenoid biosynthesis	2	1	0	Purine metabolism	2	1	0.00499
Alanine, aspartate and glutamate metabolism	6	1	0.28417	Flavonoid biosynthesis	1	1	0.02897					One carbon pool by folate	1	1	0					Folate biosynthesis	1	1	0.07873	Riboflavin metabolism	3	1	0.41482	Phosphatidylinositol signaling system	1	1	0.03285					Riboflavin metabolism	1	1	0.17778	Tryptophan metabolism	1	1	0	Glycine, serine and threonine metabolism	1	1	0
Vitamin B6 metabolism	3	1	0.14102	Amino sugar and nucleotide sugar metabolism	1	1	0					Sesquiterpenoid and triterpenoid biosynthesis	1	1	0					Inositol phosphate metabolism	1	1	0.05544	Citrate cycle (TCA cycle)	5	1	0.30472	Arginine and proline metabolism	1	1	0					Phenylalanine metabolism	1	1	0	Pantothenate and CoA biosynthesis	1	1	0	N-Glycan biosynthesis	1	1	0.00978
Sesquiterpenoid and triterpenoid biosynthesis	2	1	0.23529	Fatty acid biosynthesis	1	1	0					Lysine degradation	2	1	0					Terpenoid backbone biosynthesis	1	1	0.0672	Carbon fixation in photosynthetic organisms	5	1	0.29631	Inositol phosphate metabolism	1	1	0.10251					Cutin, suberine and wax biosynthesis	1	1	0.25	Cyanoamino acid metabolism	1	1	0	Phenylpropanoid biosynthesis	1	1	0.02575
Monobactam biosynthesis	2	1	1	Purine metabolism	1	1	0.01898					Tyrosine metabolism	2	1	0.16757					Ubiquinone and other terpenoid-quinone biosynthesis	1	1	0	One carbon pool by folate	2	1	0.02381	Ubiquinone and other terpenoid-quinone biosynthesis	1	1	0					Sulfur metabolism	1	1	0.00276	Arginine and proline metabolism	1	1	0	Glycerophospholipid metabolism	1	1	0.03859
Histidine metabolism	4	1	0.30233									Arginine and proline metabolism	3	1	0.2126					N-Glycan biosynthesis	1	1	0	Sesquiterpenoid and triterpenoid biosynthesis	2	1	0.23529	N-Glycan biosynthesis	1	1	0					Pentose and glucuronate interconversions	1	1	0	Terpenoid backbone biosynthesis	1	1	0.07013	Carotenoid biosynthesis	1	1	0
Purine metabolism	16	1	0.35487									Zeatin biosynthesis	2	1	0.00678					Glycerophospholipid metabolism	1	1	0	Cysteine and methionine metabolism	10	1	0.21906	Valine, leucine and isoleucine degradation	1	1	0					Biotin metabolism	1	1	0.08462	Steroid biosynthesis	1	1	0	Cysteine and methionine metabolism	1	1	0.06454
Valine, leucine and isoleucine biosynthesis	5	1	0.15494									Thiamine metabolism	2	1	0.27168					Carotenoid biosynthesis	1	1	0	Pantothenate and CoA biosynthesis	5	1	0.11448	Flavonoid biosynthesis	1	1	0.02897					Propanoate metabolism	1	1	0
Biosynthesis of secondary metabolites - unclassified	1	1	1									Cysteine and methionine metabolism	4	1	0					Amino sugar and nucleotide sugar metabolism	1	1	0	Tryptophan metabolism	5	1	0.5862	Fatty acid biosynthesis	1	1	0					Brassinosteroid biosynthesis	1	1	0.24074
Ubiquinone and other terpenoid-quinone biosynthesis	8	1	0.14417									Aminoacyl-tRNA biosynthesis	4	1	0									Inositol phosphate metabolism	6	1	0.14853	Purine metabolism	1	1	0.01898					Glycerolipid metabolism	1	1	0
Diterpenoid biosynthesis	11	1	0.1947									Nicotinate and nicotinamide metabolism	1	1	0.17576									Cutin, suberine and wax biosynthesis	3	1	0.25									Carbon fixation in photosynthetic organisms	1	1	0.00622
Arginine and proline metabolism	6	1	0.06649									Phosphatidylinositol signaling system	2	1	0.03285									Synthesis and degradation of ketone bodies	1	1	0									Alanine, aspartate and glutamate metabolism	1	1	0
C5-Branched dibasic acid metabolism	1	1	0.5									Glutathione metabolism	2	1	0.07752									Terpenoid backbone biosynthesis	6	1	0.2744									Valine, leucine and isoleucine biosynthesis	1	1	0.04052
Brassinosteroid biosynthesis	4	1	0.01852									Inositol phosphate metabolism	2	1	0.10251									Brassinosteroid biosynthesis	4	1	0.05556									Pantothenate and CoA biosynthesis	1	1	0
Nitrogen metabolism	2	1	0									Terpenoid backbone biosynthesis	2	1	0.02653									Phosphonate and phosphinate metabolism	1	1	0									Carotenoid biosynthesis	2	1	0.00283
Butanoate metabolism	3	1	0									Glyoxylate and dicarboxylate metabolism	2	1	0.05758									Biosynthesis of secondary metabolites - unclassified	1	1	1									Cyanoamino acid metabolism	1	1	0
Glycosylphosphatidylinositol (GPI)-anchor biosynthesis	2	1	0.34286									Butanoate metabolism	1	1	0									Aminoacyl-tRNA biosynthesis	9	1	0.11111									Glutathione metabolism	1	1	0
beta-Alanine metabolism	3	1	0.32142									beta-Alanine metabolism	1	1	0									Diterpenoid biosynthesis	9	1	0.07409									Folate biosynthesis	1	1	0.02624
Tropane, piperidine and pyridine alkaloid biosynthesis	1	1	0									Pentose phosphate pathway	1	1	0									Pyruvate metabolism	4	1	0.11347									alpha-Linolenic acid metabolism	1	1	0.11368
Valine, leucine and isoleucine degradation	7	1	0.11342									Citrate cycle (TCA cycle)	1	1	0.03308									Histidine metabolism	3	1	0.12403									Flavonoid biosynthesis	2	1	0.01216
Pentose phosphate pathway	3	1	0.11621									Carbon fixation in photosynthetic organisms	1	1	0.05846									Purine metabolism	12	1	0.07705									Arginine and proline metabolism	1	1	0
Aminoacyl-tRNA biosynthesis	9	1	0.16667									Pyruvate metabolism	1	1	0.15462									Arginine and proline metabolism	5	1	0.15748									Glycerophospholipid metabolism	1	1	0.01909
Terpenoid backbone biosynthesis	5	1	0.01307									Valine, leucine and isoleucine degradation	2	1	0.00991									Taurine and hypotaurine metabolism	1	1	0									Valine, leucine and isoleucine degradation	1	1	0.02802
Citrate cycle (TCA cycle)	3	1	0.10076									Glycerophospholipid metabolism	2	1	0.04621									Nitrogen metabolism	2	1	0									Pyrimidine metabolism	1	1	0
Sulfur metabolism	2	1	0.03591									Pyrimidine metabolism	2	1	0.10905									2-Oxocarboxylic acid metabolism	2	1	0									Steroid biosynthesis	1	1	0
Zeatin biosynthesis	3	1	0.15447									Purine metabolism	4	1	0.0074									Arginine biosynthesis	3	1	0.08544									Aminoacyl-tRNA biosynthesis	1	1	0
Thiamine metabolism	3	1	0.27746									Glycolysis / Gluconeogenesis	1	1	0.00038									Lysine degradation	3	1	0.25									Porphyrin and chlorophyll metabolism	1	1	0.03664
Stilbenoid, diarylheptanoid and gingerol biosynthesis	1	1	0.13542																					Phosphatidylinositol signaling system	4	1	0.03545
Biotin metabolism	2	1	0.12307																					Glycerolipid metabolism	3	1	0.07529
Phenylalanine metabolism	1	1	0.34615																					Glutathione metabolism	4	1	0.13357
Propanoate metabolism	2	1	0.03259																					Folate biosynthesis	4	1	0.14871
Glycine, serine and threonine metabolism	4	1	0.03563																					alpha-Linolenic acid metabolism	4	1	0.28064
Biosynthesis of unsaturated fatty acids	2	1	0																					Biosynthesis of unsaturated fatty acids	3	1	0
Fatty acid elongation	2	1	0																					Ubiquinone and other terpenoid-quinone biosynthesis	5	1	0.02454
Glyoxylate and dicarboxylate metabolism	3	1	0.04419																					beta-Alanine metabolism	2	1	0.19841
N-Glycan biosynthesis	4	1	0.06488																					Valine, leucine and isoleucine degradation	5	1	0.03907
Cysteine and methionine metabolism	6	1	0.14996																					Propanoate metabolism	2	1	0.03259
Glycolysis / Gluconeogenesis	2	1	0.00114																					Glycosylphosphatidylinositol (GPI)-anchor biosynthesis	1	1	0.22286
Phosphatidylinositol signaling system	2	1	0.03285																					Nicotinate and nicotinamide metabolism	1	1	0.26667
Glutathione metabolism	2	1	0.07146																					Zeatin biosynthesis	2	1	0.00678
Inositol phosphate metabolism	2	1	0.10251																					Thiamine metabolism	2	1	0.00578
Pyruvate metabolism	1	1	0.10385																					Carotenoid biosynthesis	5	1	0.02474
Fatty acid degradation	2	1	0.00399																					Biotin metabolism	1	1	0.04615
Steroid biosynthesis	2	1	0.08284																					N-Glycan biosynthesis	3	1	0.07466
Fatty acid biosynthesis	4	1	0.01123																					Glycerophospholipid metabolism	2	1	0.0496
																								Steroid biosynthesis	2	1	0.0355
																								Fatty acid biosynthesis	1	1	0

## Sheet: annotation 
common T2							common T1							Hs T2							Hs T1							Hr T2							Hr T1							Ts T2							Ts T1
KEGG id	Match	HMDB	PubChem	KEGG	SMILES		KEGG id	Match	HMDB	PubChem	KEGG	SMILES		KEGG id	Match	HMDB	PubChem	KEGG	SMILES		KEGG id	Match	HMDB	PubChem	KEGG	SMILES		KEGG id	Match	HMDB	PubChem	KEGG	SMILES		KEGG id	Match	HMDB	PubChem	KEGG	SMILES		KEGG id	Match	HMDB	PubChem	KEGG	SMILES		KEGG id
C00719	Betaine	HMDB0000043	247	C00719	C[N+](C)(C)CC(=O)[O-]		C00448	Farnesyl pyrophosphate	HMDB0000961	445713	C00448	CC(=CCC/C(=C/CC/C(=C/COP(=O)(O)OP(=O)(O)O)/C)/C)C		C16321	9(S)-HPOT	METPA1278	NA	C16321	NA		C16321	9(S)-HPOT	METPA1278	NA	C16321	NA		C00836	Sphinganine	HMDB0000269	91486	C00836	CCCCCCCCCCCCCCC[C@H]([C@H](CO)N)O		C00386	Carnosine	HMDB0000033	439224	C00386	C1=C(NC=N1)C[C@@H](C(=O)O)NC(=O)CCN		C04780	8-[(1R,2R)-3-Oxo-2-{(Z)-pent-2-enyl}cyclopentyl]octanoate	METPA0541	NA	C04780	NA		C15546
C00183	L-Valine	HMDB0000883	6287	C00183	CC(C)[C@@H](C(=O)O)N		C01750	Quercitrin	HMDB0033751	5280459	C01750	C[C@H]1[C@@H]([C@H]([C@H]([C@@H](O1)OC2=C(OC3=CC(=CC(=C3C2=O)O)O)C4=CC(=C(C=C4)O)O)O)O)O		C18218	16-Hydroxy hexadecanoic acid	HMDB0006294	7058075	C18218	C(CCCCCCCC(=O)[O-])CCCCCCCO		C18218	16-Hydroxy hexadecanoic acid	HMDB0006294	7058075	C18218	C(CCCCCCCC(=O)[O-])CCCCCCCO		C15976	2-Methyl-1-hydroxypropyl-ThPP	HMDB0006866	23724626	C15976	CC1=C(SC(=[N+]1CC2=CN=C(N=C2N)C)C(C(C)C)O)CCOP(=O)(O)OP(=O)(O)O		C01107	Mevalonic acid-5P	HMDB0001343	439400	C01107	C[C@@](CCOP(=O)(O)O)(CC(=O)O)O		C15802	6-Deoxocastasterone	HMDB0033984	13870433	C15802	C[C@@H]([C@H]1CC[C@@H]2[C@@]1(CC[C@H]3[C@H]2CC[C@@H]4[C@@]3(C[C@H]([C@H](C4)O)O)C)C)[C@H]([C@@H]([C@@H](C)C(C)C)O)O		C05859
C01077	Acetylhomoserine	HMDB0029423	528	C01077	CC(=O)OCCC(C(=O)O)N		C12249	kaempferol glucoside	HMDB0037429	5282102	C12249	OC[C@H]1O[C@@H](OC2=C(OC3=CC(O)=CC(O)=C3C2=O)C2=CC=C(O)C=C2)[C@H](O)[C@@H](O)[C@@H]1O		C00780	Serotonin	HMDB0000259	5202	C00780	C1=CC2=C(C=C1O)C(=CN2)CCN		C00780	Serotonin	HMDB0000259	5202	C00780	C1=CC2=C(C=C1O)C(=CN2)CCN		C00504	Folic acid	HMDB0000121	6037	C00504	C1=CC(=CC=C1C(=O)N[C@@H](CCC(=O)O)C(=O)O)NCC2=CN=C3C(=N2)C(=O)N=C(N3)N		C01494	trans-Ferulic acid	HMDB0000954	445858	C01494	COC1=C(C=CC(=C1)/C=C/C(=O)O)O		C14155	Gamma-Tocotrienol	HMDB0012958	5282349	C14155	CC1=C(C=C2CC[C@@](OC2=C1C)(C)CC/C=C(\C)/CC/C=C(\C)/CCC=C(C)C)O		C13309
C04076	Allysine	HMDB0001263	207	C04076	C(CC=O)CC(C(=O)O)N		C16911	Afzelin	NA	96023404	C16911	NA		C00078	L-Tryptophan	HMDB0000929	6305	C00078	C1=CC=C2C(=C1)C(=CN2)C[C@@H](C(=O)O)N		C00078	L-Tryptophan	HMDB0000929	6305	C00078	C1=CC=C2C(=C1)C(=CN2)C[C@@H](C(=O)O)N		C11855	Gibberellin A29-catabolite	METPA1827	NA	C11855	NA		C12204	5-Hydroxyconiferaldehyde	METPA1090	NA	C12204	NA		C20738	6-Geranylgeranyl-2,3-dimethylbenzene-1,4-diol	NA	254741206	C20738	NA		C15796
C00956	Aminoadipic acid	HMDB0000510	469	C00956	C(CC(C(=O)O)N)CC(=O)O		C01598	Melatonin	HMDB0001389	896	C01598	CC(=O)NCCC1=CNC2=C1C=C(C=C2)OC		C00643	5-Hydroxy-L-tryptophan	HMDB0000472	144	C00643	C1=CC2=C(C=C1O)C(=CN2)CC(C(=O)O)N		C00643	5-Hydroxy-L-tryptophan	HMDB0000472	144	C00643	C1=CC2=C(C=C1O)C(=CN2)CC(C(=O)O)N		C00212	Adenosine	HMDB0000050	60961	C00212	C1=NC2=C(C(=N1)N)N=CN2[C@H]3[C@@H]([C@@H]([C@H](O3)CO)O)O		C02291	L-Cystathionine	HMDB0000099	439258	C02291	C(CSC[C@@H](C(=O)O)N)[C@@H](C(=O)O)N		C14154	epsilon-Tocopherol	HMDB0030554	9844470	C14154	CC1=CC(=C(C2=C1OC(CC2)(C)CC/C=C(\C)/CC/C=C(\C)/CCC=C(C)C)C)O		C04677
C02946	4-Acetamidobutanoic acid	HMDB0003681	18189	C02946	CC(=O)NCCCC(=O)O		C00828	Vitamin K2	HMDB0030017	5283547	C00828	CC1=C(C(=O)C2=CC=CC=C2C1=O)C/C=C(\C)/CC/C=C(\C)/CC/C=C(\C)/CC/C=C(\C)/CC/C=C(\C)/CCC=C(C)C		C20121	trans,trans-Farnesyl phosphate	NA	135626581	C20121	NA		C20121	trans,trans-Farnesyl phosphate	NA	135626581	C20121	NA		C00330	Deoxyguanosine	HMDB0000085	187790	C00330	C1[C@@H]([C@H](O[C@H]1N2C=NC3=C2NC(=NC3=O)N)CO)O		C05640	Cinnavalininate	HMDB0004078	114918	C05640	C1=CC(=C2C(=C1)OC3=CC(=O)C(=C(C3=N2)C(=O)O)N)C(=O)O		C04236	2-Isopropyl-3-oxosuccinate	HMDB0012149	5462259	C04236	CC(C)[C@@H](C(=O)C(=O)O)C(=O)O		C00135
C18796	(2R)-2-Hydroxy-2-methylbutanenitrile	HMDB0060309	12650900	C18796	CC[C@@](C)(O)C#N		C02642	Ureidopropionic acid	HMDB0000026	111	C02642	C(CNC(=O)N)C(=O)O		C20700	(3E,7E)-4,8,12-Trimethyl-1,3,7,11-tridecatetraene	HMDB0034498	13941492	C20700	CC(C)=CCC\C(C)=C/CC\C(C)=C\C=C		C20700	(3E,7E)-4,8,12-Trimethyl-1,3,7,11-tridecatetraene	HMDB0034498	13941492	C20700	CC(C)=CCC\C(C)=C/CC\C(C)=C\C=C		C00499	Allantoic acid	HMDB0001209	203	C00499	C(C(=O)O)(NC(=O)N)NC(=O)N		C17222	2-(5'-Methylthio)pentylmalic acid	METPA1769	NA	C17222	NA		C00493	Shikimic acid	HMDB0003070	8742	C00493	C1[C@H]([C@@H]([C@@H](C=C1C(=O)O)O)O)O		C03765
C00253	Nicotinic acid	HMDB0001488	938	C00253	C1=CC(=CN=C1)C(=O)O		C00152	L-Asparagine	HMDB0000168	6267	C00152	C([C@@H](C(=O)O)N)C(=O)N		C08491	Jasmonic acid	HMDB0032797	5281166	C08491	CC/C=C\C[C@@H]1[C@H](CCC1=O)CC(=O)O		C08491	Jasmonic acid	HMDB0032797	5281166	C08491	CC/C=C\C[C@@H]1[C@H](CCC1=O)CC(=O)O		C16360	3,7-Dimethyluric acid	HMDB0001982	83126	C16360	CN1C2=C(NC1=O)N(C(=O)NC2=O)C		C17223	3-(5'-Methylthio)pentylmalic acid	NA	96023631	C17223	NA		C02985	Fucose 1-phosphate	HMDB0001265	439871	C02985	C[C@H]1[C@H]([C@H]([C@@H](C(O1)OP(=O)(O)O)O)O)O		C07086
C05651	5-Hydroxykynurenine	HMDB0012819	440745	C05651	C1=CC(=C(C=C1O)C(=O)CC(C(=O)O)N)N		C00429	Dihydrouracil	HMDB0000076	649	C00429	C1CNC(=O)NC1=O		C15514	8'-Hydroxyabscisate	METPA1680	NA	C15514	NA		C15514	8'-Hydroxyabscisate	METPA1680	NA	C15514	NA		C16356	1,7-Dimethyluric acid	HMDB0011103	91611	C16356	CN1C2=C(NC1=O)NC(=O)N(C2=O)C		C00025	L-Glutamic acid	HMDB0000148	33032	C00025	C(CC(=O)O)[C@@H](C(=O)O)N		C03657	1,4-Dihydroxy-2-naphthoate	METPA0422	NA	C03657	NA		C06082
C03722	Quinolinic acid	HMDB0000232	1066	C03722	C1=CC(=C(N=C1)C(=O)O)C(=O)O		C00438	Ureidosuccinic acid	HMDB0000828	93072	C00438	C([C@@H](C(=O)O)NC(=O)N)C(=O)O		C08362	Palmitoleic acid	HMDB0003229	5312427	C08362	CCCCCC/C=C\CCCCCCCC(=O)O		C08362	Palmitoleic acid	HMDB0003229	5312427	C08362	CCCCCC/C=C\CCCCCCCC(=O)O		C02938	3-Indoleacetonitrile	HMDB0006524	351795	C02938	C1=CC=C2C(=C1)C(=CN2)CC#N		C00441	L-Aspartate-semialdehyde	HMDB0012249	439235	C00441	C(C=O)[C@@H](C(=O)O)N		C01494	trans-Ferulic acid	HMDB0000954	445858	C01494	COC1=C(C=CC(=C1)/C=C/C(=O)O)O		C05966
C00047	L-Lysine	HMDB0000182	5962	C00047	C(CCN)C[C@@H](C(=O)O)N		C02512	3-Cyano-L-alanine	METPA0300	NA	C02512	NA		C15546	Cis-zeatin-O-glucoside	HMDB0012203	6250	C15546	C/C(=C\CNC1=NC=NC2=C1NC=N2)/CO[C@@H]3[C@@H]([C@H]([C@@H]([C@H](O3)CO)O)O)O		C15546	Cis-zeatin-O-glucoside	HMDB0012203	6250	C15546	C/C(=C\CNC1=NC=NC2=C1NC=N2)/CO[C@@H]3[C@@H]([C@H]([C@@H]([C@H](O3)CO)O)O)O		C17218	2-(4'-Methylthio)butylmalic acid	METPA1768	NA	C17218	NA		C00979	O-Acetylserine	HMDB0003011	99478	C00979	CC(=O)OC[C@@H](C(=O)O)N		C12204	5-Hydroxyconiferaldehyde	METPA1090	NA	C12204	NA		C05356
C00408	Pipecolic acid	HMDB0000070	849	C00408	C1CCNC(C1)C(=O)O		C17226	2-(6'-Methylthio)hexylmalic acid	METPA1770	NA	C17226	NA		C16430	trans-Zeatin riboside monophosphate	METPA1690	NA	C16430	NA		C16430	trans-Zeatin riboside monophosphate	METPA1690	NA	C16430	NA		C17219	3-(4'-Methylthio)butylmalic acid	NA	96023627	C17219	NA		C05947	L-erythro-4-Hydroxyglutamate	NA	8231	C05947	NA		C13453	Xanthoxin	HMDB0014693	586193	C13453	COC1=C2OC(=O)C=CC2=CC2=C1OC=C2		C02165
C05936	N4-Acetylaminobutanal	HMDB0004226	440850	C05936	CC(=O)NCCCC=O		C17227	3-(6'-Methylthio)hexylmalic acid	NA	96023635	C17227	NA		C19874	26-Hydroxybrassinolide	NA	135626340	C19874	NA		C19874	26-Hydroxybrassinolide	NA	135626340	C19874	NA									C05938	L-4-Hydroxyglutamate semialdehyde	HMDB0006556	440851	C05938	C([C@H](C=O)O)[C@@H](C(=O)O)N		C00794	Sorbitol	HMDB0000247	5780	C00794	C([C@H]([C@H]([C@@H]([C@H](CO)O)O)O)O)O		C00427
C01250	N-Acetyl-L-glutamate 5-semialdehyde	HMDB0006488	192878	C01250	CC(=O)N[C@@H](CCC=O)C(=O)O		C20692	9-cis-10'-Apo-beta-carotenal	NA	172232412	C20692	NA		C05966	15(S)-HPETE	HMDB0004244	5280893	C05966	CCCCC[C@@H](/C=C/C=C\C/C=C\C/C=C\CCCC(=O)O)OO		C05966	15(S)-HPETE	HMDB0004244	5280893	C05966	CCCCC[C@@H](/C=C/C=C\C/C=C\C/C=C\CCCC(=O)O)OO									C00302	DL-Glutamate	HMDB0060475	611	C00302	NC(CCC(O)=O)C(O)=O		C00588	Phosphorylcholine	HMDB0001565	8691	C00588	C[N+](C)(C)CCOP(=O)(O)O		C00584
C20258	HTPA	MA3TEM047	163311998	C20258	NA		C05307	Chlorophyll b	HMDB0031146	136969248	C05307	[Mg++].[H]\C(COC(=O)CCC1C(C)C2=N\C1=C1/C(C(=O)OC)C(=O)C3=C(C)C(=CC4=C(CC)C(=CO)C(C=C5[N-]C(=C2)C(C)=C5C=C)=N4)N=C13)=C(\C)CCCC(C)CCCC(C)CCCC(C)C		C05356	5(S)-Hydroperoxyeicosatetraenoic acid	HMDB0001193	5280778	C05356	CCCCC/C=C\C/C=C\C/C=C\C=C\[C@H](CCCC(=O)O)OO		C05356	5(S)-Hydroperoxyeicosatetraenoic acid	HMDB0001193	5280778	C05356	CCCCC/C=C\C/C=C\C/C=C\C=C\[C@H](CCCC(=O)O)OO									C05839	cis-beta-D-Glucosyl-2-hydroxycinnamate	HMDB0060077	5316113	C05839	OC[C@H]1O[C@@H](OC2=CC=CC=C2\C=C/C(O)=O)[C@H](O)[C@@H](O)[C@@H]1O		C01181	4-Trimethylammoniobutanoic acid	HMDB0001161	134	C01181	C[N+](C)(C)CCCC(=O)O		C11876
C03078	4-Guanidinobutanamide	METPA0359	NA	C03078	NA		C12144	Phytosphingosine	HMDB0004610	122121	C12144	CCCCCCCCCCCCCC[C@H]([C@H]([C@H](CO)N)O)O		C02165	Leukotriene B4	HMDB0001085	5283128	C02165	CCCCC/C=C\C[C@H](/C=C/C=C/C=C\[C@H](CCCC(=O)O)O)O		C02165	Leukotriene B4	HMDB0001085	5283128	C02165	CCCCC/C=C\C[C@H](/C=C/C=C/C=C\[C@H](CCCC(=O)O)O)O									C00249	Palmitic acid	HMDB0000220	985	C00249	CCCCCCCCCCCCCCCC(=O)O		C12206	Caffeyl alcohol	METPA1708	NA	C12206	NA		C04717
C00064	L-Glutamine	HMDB0000641	5961	C00064	C(CC(=O)N)[C@@H](C(=O)O)N		C02934	3-Dehydrosphinganine	HMDB0001480	439853	C02934	CCCCCCCCCCCCCCCC(=O)[C@H](CO)N		C11860	Gibberellin A15 open lactone	METPA1648	NA	C11860	NA		C11860	Gibberellin A15 open lactone	METPA1648	NA	C11860	NA									C01613	Stachyose	HMDB0003553	439531	C01613	C([C@@H]1[C@@H]([C@@H]([C@H]([C@H](O1)OC[C@@H]2[C@@H]([C@@H]([C@H]([C@H](O2)OC[C@@H]3[C@H]([C@@H]([C@H]([C@H](O3)O[C@]4([C@H]([C@@H]([C@H](O4)CO)O)O)CO)O)O)O)O)O)O)O)O)O)O		C01077	Acetylhomoserine	HMDB0029423	528	C01077	CC(=O)OCCC(C(=O)O)N		C14827
C21029	(R)-3-Ureidoisobutyrate	NA	254816254	C21029	NA		C00319	Sphingosine	HMDB0000252	5353955	C00319	CCCCCCCCCCCCC/C=C/C(C(CO)N)O		C06094	Gibberellin A53	HMDB0036895	5253706	C06094	CC12CCCC(C)(C1C(C(O)=O)C13CC(=C)C(O)(C1)CCC23)C(O)=O		C06094	Gibberellin A53	HMDB0036895	5253706	C06094	CC12CCCC(C)(C1C(C(O)=O)C13CC(=C)C(O)(C1)CCC23)C(O)=O									C15514	8'-Hydroxyabscisate	METPA1680	NA	C15514	NA		C00956	Aminoadipic acid	HMDB0000510	469	C00956	C(CC(C(=O)O)N)CC(=O)O		C04076
C21028	(R)-5,6-Dihydrothymine	NA	254816253	C21028	NA		C00427	Prostaglandin H2	HMDB0001381	445049	C00427	CCCCC[C@@H](/C=C/[C@H]1[C@H]2C[C@@H]([C@@H]1C/C=C\CCCC(=O)O)OO2)O		C11857	Gibberellin A12	METPA1650	NA	C11857	NA		C11857	Gibberellin A12	METPA1650	NA	C11857	NA									C01100	L-Histidinol phosphate	METPA0128	NA	C01100	NA		C16430	trans-Zeatin riboside monophosphate	METPA1690	NA	C16430	NA		C02946
C05715	gamma-Amino-gamma-cyanobutanoate	METPA0649	NA	C05715	NA		C00584	Prostaglandin E2	HMDB0001220	5283116	C00584	CCCCC[C@@H](/C=C/[C@H]1[C@@H](CC(=O)[C@@H]1C/C=C\CCCC(=O)O)O)O		C00417	cis-Aconitic acid	HMDB0000072	643757	C00417	C(/C(=C/C(=O)O)/C(=O)O)C(=O)O		C00417	cis-Aconitic acid	HMDB0000072	643757	C00417	C(/C(=C/C(=O)O)/C(=O)O)C(=O)O																C00221	D-Glucose	HMDB0000122	5793	C00221	C([C@@H]1[C@H]([C@@H]([C@H](C(O1)O)O)O)O)O		G10618
C16311	12-Oxo-9(Z)-dodecenoic acid	METPA1275	NA	C16311	NA		C11876	(ent-6alpha,7alpha)-6,7-Dihydroxy-16-kauren-19-oic acid	HMDB0036763	0	C11876	CC12CCCC(C)(C1C(O)C(O)C13CC(CCC21)C(=C)C3)C(O)=O		C05422	Dehydroascorbic acid	HMDB0001264	7786	C05422	C([C@H]([C@@H]1C(=O)C(=O)C(=O)O1)O)O		C05422	Dehydroascorbic acid	HMDB0001264	7786	C05422	C([C@H]([C@@H]1C(=O)C(=O)C(=O)O1)O)O																C00159	D-Mannose	HMDB0000169	18950	C00159	C([C@@H]1[C@H]([C@@H]([C@@H](C(O1)O)O)O)O)O		G10617
C16322	9-Oxononanoic acid	METPA1279	NA	C16322	NA		C15792	3-Dehydroteasterone	NA	47205117	C15792	NA		C00311	Isocitric acid	HMDB0000193	1198	C00311	C(C(C(C(=O)O)O)C(=O)O)C(=O)O		C00311	Isocitric acid	HMDB0000193	1198	C00311	C(C(C(C(=O)O)O)C(=O)O)C(=O)O																C00137	myo-Inositol	HMDB0000211	NA	C00137	O[C@H]1[C@H](O)[C@@H](O)[C@H](O)[C@H](O)[C@@H]1O		C01250
C11512	Methyl jasmonate	HMDB0036583	5367719	C11512	CC\C=C/C[C@@H]1[C@@H](CC(=O)OC)CCC1=O		C15802	6-Deoxocastasterone	HMDB0033984	13870433	C15802	C[C@@H]([C@H]1CC[C@@H]2[C@@]1(CC[C@H]3[C@H]2CC[C@@H]4[C@@]3(C[C@H]([C@H](C4)O)O)C)C)[C@H]([C@@H]([C@@H](C)C(C)C)O)O		C00158	Citric acid	HMDB0000094	311	C00158	C(C(=O)O)C(CC(=O)O)(C(=O)O)O		C00158	Citric acid	HMDB0000094	311	C00158	C(C(=O)O)C(CC(=O)O)(C(=O)O)O																C01825	L-Galactose	HMDB0033704	6036	C01825	C([C@H]1[C@H]([C@H]([C@@H](C(O1)O)O)O)O)O		C00624
C01149	4-Trimethylammoniobutanal	HMDB0001345	133	C01149	C[N+](C)(C)CCCC=O		C03090	5-Phosphoribosylamine	HMDB0001128	439905	C03090	C([C@@H]1[C@H]([C@H]([C@@H](O1)N)O)O)OP(=O)(O)O		C00072	Ascorbate	NA	3372	C00072	NA		C00072	Ascorbate	NA	3372	C00072	NA																C00944	3-Dehydroquinate	HMDB0012710	439351	C00944	C1[C@H]([C@@H](C(=O)C[C@]1(C(=O)O)O)O)O		C03090
C01571	Capric acid	HMDB0000511	2969	C01571	CCCCCCCCCC(=O)O		C00355	L-Dopa	HMDB0000181	6047	C00355	C1=CC(=C(C=C1C[C@@H](C(=O)O)N)O)O		C00818	Glucaric acid	HMDB0000663	33037	C00818	[C@H]([C@@H]([C@@H](C(=O)O)O)O)([C@H](C(=O)O)O)O		C00818	Glucaric acid	HMDB0000663	33037	C00818	[C@H]([C@@H]([C@@H](C(=O)O)O)O)([C@H](C(=O)O)O)O																C02336	D-Fructose	HMDB0000660	439709	C02336	C([C@@H]1[C@H]([C@@H]([C@](O1)(CO)O)O)O)O		C00450
C02034	Gibberellin A19	HMDB0036896	4632015	C02034	CC1(CCCC2(C=O)C3CCC4(O)CC3(CC4=C)C(C12)C(O)=O)C(O)=O		C00719	Betaine	HMDB0000043	247	C00719	C[N+](C)(C)CC(=O)[O-]		C00385	Xanthine	HMDB0000292	1188	C00385	C1=NC2=C(N1)C(=O)NC(=O)N2		C00385	Xanthine	HMDB0000292	1188	C00385	C1=NC2=C(N1)C(=O)NC(=O)N2																C03313	Reduced Vitamin K (phylloquinone)	HMDB0004198	5284607	C03313	CC(C)CCCC(C)CCCC(C)CCC/C(=C/CC12C(C3=CC=CC=C3C(C1(O2)C)O)O)/C		C15514
C11861	Gibberellin A124	HMDB0037103	0	C11861	[H][C@@]12C[C@H](O)[C@]3(O)C[C@]1(CC3=C)[C@@H](C(O)=O)[C@@]1([H])[C@@]22CCC[C@]1(C)C(=O)OC2		C00183	L-Valine	HMDB0000883	6287	C00183	CC(C)[C@@H](C(=O)O)N		C00353	Geranylgeranyl-PP	HMDB0004486	447277	C00353	CC(=CCC/C(=C/CC/C(=C/CC/C(=C/COP(=O)(O)OP(=O)(O)O)/C)/C)/C)C		C00353	Geranylgeranyl-PP	HMDB0004486	447277	C00353	CC(=CCC/C(=C/CC/C(=C/CC/C(=C/COP(=O)(O)OP(=O)(O)O)/C)/C)/C)C																C01762	Xanthosine	HMDB0000299	64959	C01762	C1=NC2=C(N1[C@H]3[C@@H]([C@@H]([C@H](O3)CO)O)O)NC(=O)NC2=O		C18218
C02325	Sinapyl alcohol	HMDB0013070	5280507	C02325	COC1=CC(=CC(=C1O)OC)/C=C/CO		C01077	Acetylhomoserine	HMDB0029423	528	C01077	CC(=O)OCCC(C(=O)O)N		C06089	ent-Copalyl diphosphate	METPA0756	NA	C06089	NA		C06089	ent-Copalyl diphosphate	METPA0756	NA	C06089	NA																C07480	Theobromine	HMDB0002825	5429	C07480	CN1C=NC2=C1C(=O)NC(=O)N2C		C08325
C18167	Secoisolariciresinol	HMDB0013692	65373	C18167	COC1=C(C=CC(=C1)C[C@@H](CO)[C@@H](CC2=CC(=C(C=C2)O)OC)CO)O		C04076	Allysine	HMDB0001263	207	C04076	C(CC=O)CC(C(=O)O)N		C02034	Gibberellin A19	HMDB0036896	4632015	C02034	CC1(CCCC2(C=O)C3CCC4(O)CC3(CC4=C)C(C12)C(O)=O)C(O)=O		C02034	Gibberellin A19	HMDB0036896	4632015	C02034	CC1(CCCC2(C=O)C3CCC4(O)CC3(CC4=C)C(C12)C(O)=O)C(O)=O																C13747	Paraxanthine	HMDB0001860	4687	C13747	CN1C=NC2=C1C(=O)N(C(=O)N2)C		C21016
C20456	(+)-Secoisolariciresinol	NA	163312193	C20456	NA		C00956	Aminoadipic acid	HMDB0000510	469	C00956	C(CC(C(=O)O)N)CC(=O)O		C11861	Gibberellin A124	HMDB0037103	0	C11861	[H][C@@]12C[C@H](O)[C@]3(O)C[C@]1(CC3=C)[C@@H](C(O)=O)[C@@]1([H])[C@@]22CCC[C@]1(C)C(=O)OC2		C11861	Gibberellin A124	HMDB0037103	0	C11861	[H][C@@]12C[C@H](O)[C@]3(O)C[C@]1(CC3=C)[C@@H](C(O)=O)[C@@]1([H])[C@@]22CCC[C@]1(C)C(=O)OC2																C00666	Diaminopimelic acid	HMDB0001370	99290	C00666	C(C[C@@H](C(=O)O)N)C[C@@H](C(=O)O)N		C01092
C05610	Sinapoyl aldehyde	METPA0625	NA	C05610	NA		C02946	4-Acetamidobutanoic acid	HMDB0003681	18189	C02946	CC(=O)NCCCC(=O)O		C18167	Secoisolariciresinol	HMDB0013692	65373	C18167	COC1=C(C=CC(=C1)C[C@@H](CO)[C@@H](CC2=CC(=C(C=C2)O)OC)CO)O		C18167	Secoisolariciresinol	HMDB0013692	65373	C18167	COC1=C(C=CC(=C1)C[C@@H](CO)[C@@H](CC2=CC(=C(C=C2)O)OC)CO)O																C13455	Abscisic aldehyde	METPA1110	NA	C13455	NA		C00242
C15514	8'-Hydroxyabscisate	METPA1680	NA	C15514	NA		C18796	(2R)-2-Hydroxy-2-methylbutanenitrile	HMDB0060309	12650900	C18796	CC[C@@](C)(O)C#N		C20456	(+)-Secoisolariciresinol	NA	163312193	C20456	NA		C20456	(+)-Secoisolariciresinol	NA	163312193	C20456	NA																C01598	Melatonin	HMDB0001389	896	C01598	CC(=O)NCCC1=CNC2=C1C=C(C=C2)OC		C06427
C08491	Jasmonic acid	HMDB0032797	5281166	C08491	CC/C=C\C[C@@H]1[C@H](CCC1=O)CC(=O)O		C00314	Pyridoxine	HMDB0000239	1054	C00314	CC1=NC=C(C(=C1O)CO)CO		C00440	5-Methyltetrahydrofolic acid	HMDB0001396	439234	C00440	CN1C(CNC2=C1C(=O)N=C(N2)N)CNC3=CC=C(C=C3)C(=O)N[C@H](CCC(=O)O)C(=O)O		C00440	5-Methyltetrahydrofolic acid	HMDB0001396	439234	C00440	CN1C(CNC2=C1C(=O)N=C(N2)N)CNC3=CC=C(C=C3)C(=O)N[C@H](CCC(=O)O)C(=O)O																C20690	1D-myo-Inositol 1,5-bis(diphosphate) 2,3,4,6-tetrakisphosphate	NA	172232410	C20690	NA		C06426
C04780	8-[(1R,2R)-3-Oxo-2-{(Z)-pent-2-enyl}cyclopentyl]octanoate	METPA0541	NA	C04780	NA		C04350	(E)-4-Hydroxyphenylacetaldehyde oxime	NA	6999	C04350	NA		C16323	(3Z,6Z)-3,6-Nonadienal	HMDB0031152	5352808	C16323	CC/C=C\C/C=C\CC=O		C16323	(3Z,6Z)-3,6-Nonadienal	HMDB0031152	5352808	C16323	CC/C=C\C/C=C\CC=O																C00844	Prunasin	HMDB0034934	119033	C00844	C1=CC=C(C=C1)[C@H](C#N)O[C@H]2[C@@H]([C@H]([C@@H]([C@H](O2)CO)O)O)O		C00590
C18217	16-Feruloyloxypalmitate	NA	103061399	C18217	NA		C11863	Gibberellin A9	METPA1064	NA	C11863	NA		C06427	Alpha-Linolenic acid	HMDB0001388	5280934	C06427	CC/C=C\C/C=C\C/C=C\CCCCCCCC(=O)O		C06427	Alpha-Linolenic acid	HMDB0001388	5280934	C06427	CC/C=C\C/C=C\C/C=C\CCCCCCCC(=O)O																C00499	Allantoic acid	HMDB0001209	203	C00499	C(C(=O)O)(NC(=O)N)NC(=O)N		C12205
C15792	3-Dehydroteasterone	NA	47205117	C15792	NA		C16311	12-Oxo-9(Z)-dodecenoic acid	METPA1275	NA	C16311	NA		C06426	Gamma-Linolenic acid	HMDB0003073	5280933	C06426	CCCCC/C=C\C/C=C\C/C=C\CCCCC(=O)O		C06426	Gamma-Linolenic acid	HMDB0003073	5280933	C06426	CCCCC/C=C\C/C=C\C/C=C\CCCCC(=O)O																C02350	(S)(+)-Allantoin	METPA0276	NA	C02350	NA		C02646
C06081	Farnesol	HMDB0004305	445070	C06081	CC(=CCC/C(=C/CC/C(=C/CO)/C)/C)C		C04717	13-L-Hydroperoxylinoleic acid	HMDB0003871	6437847	C04717	CCCCC[C@@H](/C=C/C=C\CCCCCCCC(=O)O)OO		C06081	Farnesol	HMDB0004305	445070	C06081	CC(=CCC/C(=C/CC/C(=C/CO)/C)/C)C		C06081	Farnesol	HMDB0004305	445070	C06081	CC(=CCC/C(=C/CC/C(=C/CO)/C)/C)C																C12128	(-)-Epiafzelechin	HMDB0030822	443639	C12128	C1[C@H]([C@H](OC2=CC(=CC(=C21)O)O)C3=CC=C(C=C3)O)O		C05512
C04717	13-L-Hydroperoxylinoleic acid	HMDB0003871	6437847	C04717	CCCCC[C@@H](/C=C/C=C\CCCCCCCC(=O)O)OO		C14827	9(S)-HPODE	HMDB0006940	6439847	C14827	CCCCC/C=C\C=C\C(CCCCCCCC(=O)O)OO		C04672	(9Z,15Z)-(13S)-12,13-Epoxyoctadeca-9,11,15-trienoic acid	METPA0529	NA	C04672	NA		C04672	(9Z,15Z)-(13S)-12,13-Epoxyoctadeca-9,11,15-trienoic acid	METPA0529	NA	C04672	NA																C09320	Afzelechin	HMDB0030823	282014	C09320	C1C(C(OC2=CC(=CC(=C21)O)O)C3=CC=C(C=C3)O)O		C02034
C14827	9(S)-HPODE	HMDB0006940	6439847	C14827	CCCCC/C=C\C=C\C(CCCCCCCC(=O)O)OO		C01210	N-Methylethanolamine phosphate	METPA0145	NA	C01210	NA		C05797	Pheophytin a	METPA0689	NA	C05797	NA		C05797	Pheophytin a	METPA0689	NA	C05797	NA																C00774	Phloretin	HMDB0003306	4788	C00774	C1=CC(=CC=C1CCC(=O)C2=C(C=C(C=C2O)O)O)O		C11861
C01126	(2E,6E)-Farnesol	NA	4357	C01126	NA		C00341	Geranyl 2-methylbutyrate	HMDB0032291	6437648	C00341	CCC(C)C(=O)OC/C=C(\C)/CCC=C(C)C		C01126	(2E,6E)-Farnesol	NA	4357	C01126	NA		C01126	(2E,6E)-Farnesol	NA	4357	C01126	NA																C05401	Galactosylglycerol	HMDB0006790	656504	C05401	C([C@@H]1[C@@H]([C@@H]([C@H]([C@@H](O1)OCC(CO)O)O)O)O)O		C03579
C00214	Thymidine	HMDB0000273	5789	C00214	CC1=CN(C(=O)NC1=O)[C@H]2C[C@@H]([C@H](O2)CO)O		C02139	Chlorophyllide	METPA0252	NA	C02139	NA		C00719	Betaine	HMDB0000043	247	C00719	C[N+](C)(C)CC(=O)[O-]		C00719	Betaine	HMDB0000043	247	C00719	C[N+](C)(C)CC(=O)[O-]																C01081	Thiamine monophosphate	HMDB0002666	3382778	C01081	CC1=C(SC=[N+]1CC2=CN=C(N=C2N)C)CCOP(=O)(O)[O-]		C18167
C00780	Serotonin	HMDB0000259	5202	C00780	C1=CC2=C(C=C1O)C(=CN2)CCN		C11829	13(1)-Hydroxy-magnesium-protoporphyrin IX 13-monomethyl ester	METPA1059	NA	C11829	NA		C00183	L-Valine	HMDB0000883	6287	C00183	CC(C)[C@@H](C(=O)O)N		C00183	L-Valine	HMDB0000883	6287	C00183	CC(C)[C@@H](C(=O)O)N																C00852	Chlorogenic acid	HMDB0003164	1794427	C00852	C1[C@H]([C@H]([C@@H](C[C@@]1(C(=O)O)O)OC(=O)/C=C/C2=CC(=C(C=C2)O)O)O)O		C20456
C00449	Saccharopine	HMDB0000279	160556	C00449	C(CCN[C@@H](CCC(=O)O)C(=O)O)C[C@@H](C(=O)O)N		C04785	13(S)-HPOT	METPA0543	NA	C04785	NA		C01077	Acetylhomoserine	HMDB0029423	528	C01077	CC(=O)OCCC(C(=O)O)N		C01077	Acetylhomoserine	HMDB0029423	528	C01077	CC(=O)OCCC(C(=O)O)N																C01594	Lansoprazole	HMDB0005008	3883	C01594	CC1=C(C=CN=C1CS(=O)C2=NC3=CC=CC=C3N2)OCC(F)(F)F		C05844
C04498	4-Hydroxycinnamoylagmatine	HMDB0033460	5280691	C04498	C1=CC(=CC=C1/C=C/C(=O)NCCCCN=C(N)N)O		C01226	12-OPDA	METPA0152	NA	C01226	NA		C04076	Allysine	HMDB0001263	207	C04076	C(CC=O)CC(C(=O)O)N		C04076	Allysine	HMDB0001263	207	C04076	C(CC=O)CC(C(=O)O)N																C17621	10-Hydroxygeraniol	METPA1453	NA	C17621	NA		C01024
C08285	(S)-10,16-Dihydroxyhexadecanoic acid	HMDB0037798	441449	C08285	OCCCCCCC(O)CCCCCCCCC(O)=O		C16324	9,10-EOT	METPA1281	NA	C16324	NA		C00956	Aminoadipic acid	HMDB0000510	469	C00956	C(CC(C(=O)O)N)CC(=O)O		C00956	Aminoadipic acid	HMDB0000510	469	C00956	C(CC(C(=O)O)N)CC(=O)O																C01268	5-Amino-6-(5'-phosphoribosylamino)uracil	METPA0159	NA	C01268	NA		C00311
G00001	NA	NA	NA	NA	NA		C01079	Protoporphyrinogen IX	HMDB0001097	121893	C01079	CC1=C2CC3=C(C(=C(N3)CC4=C(C(=C(N4)CC5=C(C(=C(N5)CC(=C1CCC(=O)O)N2)CCC(=O)O)C)C=C)C)C=C)C		C02946	4-Acetamidobutanoic acid	HMDB0003681	18189	C02946	CC(=O)NCCCC(=O)O		C02946	4-Acetamidobutanoic acid	HMDB0003681	18189	C02946	CC(=O)NCCCC(=O)O																C15981	Alpha-Cryptoxanthin	HMDB0002268	23724629	C15981	CC1=C(C(CCC1)(C)C)/C=C/C(=C/C=C/C(=C/C=C/C=C(\C)/C=C/C=C(\C)/C=C/C2C(=C[C@@H](CC2(C)C)O)C)/C)/C		C00158
G00143	(GlcNAc)1 (Ino-P)1	METPA1581	NA	G00143	NA		C00836	Sphinganine	HMDB0000269	91486	C00836	CCCCCCCCCCCCCCC[C@H]([C@H](CO)N)O		C18796	(2R)-2-Hydroxy-2-methylbutanenitrile	HMDB0060309	12650900	C18796	CC[C@@](C)(O)C#N		C18796	(2R)-2-Hydroxy-2-methylbutanenitrile	HMDB0060309	12650900	C18796	CC[C@@](C)(O)C#N																C08590	Zeinoxanthin	NA	10783	C08590	NA		C00448
C02679	Dodecanoic acid	HMDB0000638	3893	C02679	CCCCCCCCCCCC(=O)O		C06082	(S)-Abscisic acid	HMDB0035140	5702609	C06082	CC1=CC(=O)CC([C@]1(/C=C/C(=C/C(=O)O)/C)O)(C)C		C03263	Coproporphyrinogen III	HMDB0001261	321	C03263	CC1=C2CC3=C(C(=C(N3)CC4=C(C(=C(N4)CC5=C(C(=C(N5)CC(=C1CCC(=O)O)N2)C)CCC(=O)O)C)CCC(=O)O)CCC(=O)O)C		C03263	Coproporphyrinogen III	HMDB0001261	321	C03263	CC1=C2CC3=C(C(=C(N3)CC4=C(C(=C(N4)CC5=C(C(=C(N5)CC(=C1CCC(=O)O)N2)C)CCC(=O)O)C)CCC(=O)O)CCC(=O)O)C																C08591	beta-Cryptoxanthin	HMDB0033844	6384256	C08591	CC1=C(C(CCC1)(C)C)/C=C/C(=C/C=C/C(=C/C=C/C=C(\C)/C=C/C=C(\C)/C=C/C2=C(CC(CC2(C)C)O)C)/C)/C		C01185
C13453	Xanthoxin	HMDB0014693	586193	C13453	COC1=C2OC(=O)C=CC2=CC2=C1OC=C2		C13455	Abscisic aldehyde	METPA1110	NA	C13455	NA		C05768	Coproporphyrinogen I	HMDB0002158	68271	C05768	CC1=C2CC3=C(C(=C(N3)CC4=C(C(=C(N4)CC5=C(C(=C(N5)CC(=C1CCC(=O)O)N2)C)CCC(=O)O)C)CCC(=O)O)C)CCC(=O)O		C05768	Coproporphyrinogen I	HMDB0002158	68271	C05768	CC1=C2CC3=C(C(=C(N3)CC4=C(C(=C(N4)CC5=C(C(=C(N5)CC(=C1CCC(=O)O)N2)C)CCC(=O)O)C)CCC(=O)O)C)CCC(=O)O																C06427	Alpha-Linolenic acid	HMDB0001388	5280934	C06427	CC/C=C\C/C=C\C/C=C\CCCCCCCC(=O)O		C05908
C20690	1D-myo-Inositol 1,5-bis(diphosphate) 2,3,4,6-tetrakisphosphate	NA	172232410	C20690	NA		C00483	Tyramine	HMDB0000306	5610	C00483	C1=CC(=CC=C1CCN)O		C00482	Sinapic acid	HMDB0032616	637775	C00482	COC1=CC(=CC(=C1O)OC)/C=C/C(=O)O		C00482	Sinapic acid	HMDB0032616	637775	C00482	COC1=CC(=CC(=C1O)OC)/C=C/C(=O)O																C06426	Gamma-Linolenic acid	HMDB0003073	5280933	C06426	CCCCC/C=C\C/C=C\C/C=C\CCCCC(=O)O		C00357
C11860	Gibberellin A15 open lactone	METPA1648	NA	C11860	NA		C00079	L-Phenylalanine	HMDB0000159	6140	C00079	C1=CC=C(C=C1)C[C@@H](C(=O)O)N		C16322	9-Oxononanoic acid	METPA1279	NA	C16322	NA		C16322	9-Oxononanoic acid	METPA1279	NA	C16322	NA																C11857	Gibberellin A12	METPA1650	NA	C11857	NA		C04501
C06094	Gibberellin A53	HMDB0036895	5253706	C06094	CC12CCCC(C)(C1C(C(O)=O)C13CC(=C)C(O)(C1)CCC23)C(O)=O		C21015	gamma-L-Glutamyl-L-2-aminobutyrate	NA	254741469	C21015	NA		C02090	Trypanothione	HMDB0060520	449517	C02090	N[C@@H](CCC(=O)N[C@@H](CS)C(=O)NCC(=O)NCCCCNCCCNC(=O)CNC(=O)[C@H](CS)NC(=O)CC[C@H](N)C(O)=O)C(O)=O		C02090	Trypanothione	HMDB0060520	449517	C02090	N[C@@H](CCC(=O)N[C@@H](CS)C(=O)NCC(=O)NCCCCNCCCNC(=O)CNC(=O)[C@H](CS)NC(=O)CC[C@H](N)C(O)=O)C(O)=O																C06093	Gibberellin A12 7-aldehyde	HMDB0039484	5253705	C06093	CC12CCCC(C)(C1C(C=O)C13CC(CCC21)C(=C)C3)C(O)=O		C03506
C01595	Linoleic acid	HMDB0000673	5280450	C01595	CCCCC/C=C\C/C=C\CCCCCCCC(=O)O		C03516	Magnesium protoporphyrin	METPA0404	NA	C03516	NA		C10646	Lariciresinol	NA	12829	C10646	NA		C10646	Lariciresinol	NA	12829	C10646	NA																C18016	3beta-Hydroxy-9beta-pimara-7,15-diene-19,6beta-olide	NA	96024236	C18016	NA		C02029
C19616	18-Hydroxyoleate	NA	135626104	C19616	NA		C05993	Acetyl adenylate	HMDB0006880	440867	C05993	CC(=O)OP(=O)(O)OC[C@@H]1[C@H]([C@H]([C@@H](O1)N2C=NC3=C2N=CN=C3N)O)O		C20454	(-)-Lariciresinol	NA	163312191	C20454	NA		C20454	(-)-Lariciresinol	NA	163312191	C20454	NA																C11876	(ent-6alpha,7alpha)-6,7-Dihydroxy-16-kauren-19-oic acid	HMDB0036763	0	C11876	CC12CCCC(C)(C1C(O)C(O)C13CC(CCC21)C(=C)C3)C(O)=O		C05905
C19418	9,10-Epoxystearic acid	HMDB0061650	15868	C19418	CCCCCCCCC1OC1CCCCCCCC(O)=O		C01595	Linoleic acid	HMDB0000673	5280450	C01595	CCCCC/C=C\C/C=C\CCCCCCCC(=O)O		G01977	NA	NA	NA	NA	NA		G01977	NA	NA	NA	NA	NA																C19620	9,10-Epoxystearic acid	HMDB0061650	15868	C19620	CCCCCCCCC1OC1CCCCCCCC(O)=O		C07480
C05839	cis-beta-D-Glucosyl-2-hydroxycinnamate	HMDB0060077	5316113	C05839	OC[C@H]1O[C@@H](OC2=CC=CC=C2\C=C/C(O)=O)[C@H](O)[C@@H](O)[C@@H]1O		C19616	18-Hydroxyoleate	NA	135626104	C19616	NA		C12208	3-O-p-Coumaroylquinic acid	HMDB0029681	9945785	C12208	O[C@@H]1C[C@@](O)(C[C@@H](OC(=O)\C=C\C2=CC=C(O)C=C2)[C@H]1O)C(O)=O		C12208	3-O-p-Coumaroylquinic acid	HMDB0029681	9945785	C12208	O[C@@H]1C[C@@](O)(C[C@@H](OC(=O)\C=C\C2=CC=C(O)C=C2)[C@H]1O)C(O)=O																C13309	Demethylphylloquinone	HMDB0004649	56927684	C13309	CC(C)CCCC(C)CCCC(C)CCC/C(=C/CC1=CC(=O)C2=CC=CC=C2C1=O)/C		C13747
C06082	(S)-Abscisic acid	HMDB0035140	5702609	C06082	CC1=CC(=O)CC([C@]1(/C=C/C(=C/C(=O)O)/C)O)(C)C		C19418	9,10-Epoxystearic acid	HMDB0061650	15868	C19418	CCCCCCCCC1OC1CCCCCCCC(O)=O		C02666	Coniferyl aldehyde	METPA0314	NA	C02666	NA		C02666	Coniferyl aldehyde	METPA0314	NA	C02666	NA																C15796	22alpha-Hydroxy-campest-4-en-3-one	METPA1661	NA	C15796	NA		C16360
C04672	(9Z,15Z)-(13S)-12,13-Epoxyoctadeca-9,11,15-trienoic acid	METPA0529	NA	C04672	NA		C03427	Prephytoene diphosphate	HMDB0003023	24883415	C03427	CC(=CCC/C(=C/CC/C(=C/CC/C(=C/[C@@H]1[C@H]([C@]1(C)CC/C=C(\C)/CC/C=C(\C)/CCC=C(C)C)COP(=O)(O)OP(=O)(O)O)/C)/C)/C)C		C01801	Deoxyribose	HMDB0003224	22833604	C01801	C1[C@H]([C@@H](O[C@@H]1O)CO)O		C00221	D-Glucose	HMDB0000122	5793	C00221	C([C@@H]1[C@H]([C@@H]([C@H](C(O1)O)O)O)O)O																C00082	L-Tyrosine	HMDB0000158	6057	C00082	C1=CC(=CC=C1C[C@@H](C(=O)O)N)O		C16356
C05797	Pheophytin a	METPA0689	NA	C05797	NA		C00025	L-Glutamic acid	HMDB0000148	33032	C00025	C(CC(=O)O)[C@@H](C(=O)O)N		C01019	L-Fucose	HMDB0000174	25310	C01019	C[C@H]1[C@H]([C@H]([C@@H](C(O1)O)O)O)O		C00267	Alpha-D-Glucose	HMDB0003345	79025	C00267	C([C@@H]1[C@H]([C@@H]([C@H]([C@H](O1)O)O)O)O)O																C00329	Glucosamine	HMDB0001514	439213	C00329	C([C@@H]1[C@H]([C@@H]([C@H](C(O1)O)N)O)O)O		C02693
C03516	Magnesium protoporphyrin	METPA0404	NA	C03516	NA		C00979	O-Acetylserine	HMDB0003011	99478	C00979	CC(=O)OC[C@@H](C(=O)O)N		C04272	(R)-2,3-Dihydroxy-isovalerate	HMDB0012141	440279	C04272	CC(C)([C@H](C(=O)O)O)O		C01801	Deoxyribose	HMDB0003224	22833604	C01801	C1[C@H]([C@@H](O[C@@H]1O)CO)O																C00826	L-Arogenate	METPA0086	NA	C00826	NA		C01210
C00933	Sinapine	HMDB0029379	89287	C00933	C[N+](C)(C)CCOC(=O)C=CC1=CC(=C(C(=C1)OC)O)OC		C05938	L-4-Hydroxyglutamate semialdehyde	HMDB0006556	440851	C05938	C([C@H](C=O)O)[C@@H](C(=O)O)N		C21016	Ophthalmic acid	HMDB0005765	7018721	C21016	CC[C@@H](C(=O)NCC(=O)O)NC(=O)CC[C@@H](C(=O)O)N		C00159	D-Mannose	HMDB0000169	18950	C00159	C([C@@H]1[C@H]([C@@H]([C@@H](C(O1)O)O)O)O)O																C17230	2-(7'-Methylthio)heptylmalic acid	METPA1771	NA	C17230	NA		C03657
C01226	12-OPDA	METPA0152	NA	C01226	NA		C00302	DL-Glutamate	HMDB0060475	611	C00302	NC(CCC(O)=O)C(O)=O		C01100	L-Histidinol phosphate	METPA0128	NA	C01100	NA		C00095	D-Fructose	NA	3395	C00095	NA																C17231	3-(7'-Methylthio)heptylmalic acid	NA	96023639	C17231	NA		C05366
C16324	9,10-EOT	METPA1281	NA	C16324	NA		C01118	O-Succinyl-L-homoserine	METPA0134	NA	C01118	NA		C01417	Cyanate	HMDB0002078	105034	C01417	C(#N)[O-]		C01019	L-Fucose	HMDB0000174	25310	C01019	C[C@H]1[C@H]([C@H]([C@@H](C(O1)O)O)O)O																C05402	Melibiose	HMDB0000048	440658	C05402	OC[C@H]1O[C@H](OC[C@H]2O[C@H](O)[C@H](O)[C@@H](O)[C@H]2O)[C@@H](O)[C@@H](O)[C@@H]1O		C20455
C04785	13(S)-HPOT	METPA0543	NA	C04785	NA		C04281	Pyrroline hydroxycarboxylic acid	HMDB0001369	1059	C04281	C1C(C=NC1C(=O)O)O		C17743	Bisdemethoxycurcumin	HMDB0002114	5315472	C17743	C1=CC(=CC=C1/C=C/C(=O)CC(=O)/C=C/C2=CC=C(C=C2)O)O		C00124	D-Galactose	NA	3424	C00124	NA																C05400	Isomaltose	HMDB0002923	440656	C05400	OC[C@H]1O[C@H](OC[C@H]2O[C@H](O)[C@H](O)[C@@H](O)[C@H]2O)[C@@H](O)[C@@H](O)[C@@H]1O		C00108
C12208	3-O-p-Coumaroylquinic acid	HMDB0029681	9945785	C12208	O[C@@H]1C[C@@](O)(C[C@@H](OC(=O)\C=C\C2=CC=C(O)C=C2)[C@H]1O)C(O)=O		C01879	Pyroglutamic acid	HMDB0000267	7405	C01879	C1CC(=O)N[C@@H]1C(=O)O		C16911	Afzelin	NA	96023404	C16911	NA		C00031	D-Glucose	HMDB0000122	5793	C00031	C([C@@H]1[C@H]([C@@H]([C@H](C(O1)O)O)O)O)O																C01235	Beta-Cortol	HMDB0005821	246164	C01235	C[C@]12CC[C@H](C[C@H]1CC[C@@H]3[C@@H]2[C@H](C[C@]4([C@H]3CC[C@@]4([C@@H](CO)O)O)C)O)O		C00250
C05855	4-Hydroxycinnamyl alcohol 4-D-glucoside	METPA1706	NA	C05855	NA		C05859	Dehydrodolichol diphosphate	NA	8152	C05859	NA									C00137	myo-Inositol	HMDB0000211	NA	C00137	O[C@H]1[C@H](O)[C@@H](O)[C@H](O)[C@H](O)[C@@H]1O																C00185	1-beta-D-Glucopyranosyl-4-D-glucopyranose	MA3TEM061	3485	C00185	C(CC=O)CC=O		C00253
C02934	3-Dehydrosphinganine	HMDB0001480	439853	C02934	CCCCCCCCCCCCCCCC(=O)[C@H](CO)N		C00534	Pyridoxamine	HMDB0001431	1052	C00534	CC1=NC=C(C(=C1O)CN)CO									C00984	D-Galactose	HMDB0000143	439357	C00984	C([C@@H]1[C@@H]([C@@H]([C@H]([C@H](O1)O)O)O)O)O																C01083	Trehalose	HMDB0000975	7427	C01083	C([C@@H]1[C@H]([C@@H]([C@H]([C@H](O1)O[C@@H]2[C@@H]([C@H]([C@@H]([C@H](O2)CO)O)O)O)O)O)O)O		C00568
C00319	Sphingosine	HMDB0000252	5353955	C00319	CCCCCCCCCCCCC/C=C/C(C(CO)N)O		C00931	Porphobilinogen	HMDB0000245	1021	C00931	C1=C(C(=C(N1)CN)CC(=O)O)CCC(=O)O									C01825	L-Galactose	HMDB0033704	6036	C01825	C([C@H]1[C@H]([C@H]([C@@H](C(O1)O)O)O)O)O																C00208	D-Maltose	HMDB0000163	10991489	C00208	C([C@@H]1[C@H]([C@@H]([C@H]([C@H](O1)O[C@@H]2[C@H](O[C@@H]([C@H]([C@H]2O)O)O)CO)O)O)O)O		C06007
C12144	Phytosphingosine	HMDB0004610	122121	C12144	CCCCCCCCCCCCCC[C@H]([C@H]([C@H](CO)N)O)O		C19620	9,10-Epoxystearic acid	HMDB0061650	15868	C19620	CCCCCCCCC1OC1CCCCCCCC(O)=O									C04272	(R)-2,3-Dihydroxy-isovalerate	HMDB0012141	440279	C04272	CC(C)([C@H](C(=O)O)O)O																C11855	Gibberellin A29-catabolite	METPA1827	NA	C11855	NA		C00522
C00255	Riboflavin	HMDB0000244	493570	C00255	CC1=CC2=C(C=C1C)N(C3=NC(=O)NC(=O)C3=N2)C[C@@H]([C@@H]([C@@H](CO)O)O)O		C00510	Oleoyl-CoA	HMDB0001322	5280355	C00510	CCCCCCCC/C=C\CCCCCCCC(=O)SCCNC(=O)CCNC(=O)C(C(C)(C)COP(=O)(O)OP(=O)(O)OC[C@@H]1[C@H]([C@H]([C@@H](O1)N2C=NC3=C2N=CN=C3N)O)OP(=O)(O)O)O									C02336	D-Fructose	HMDB0000660	439709	C02336	C([C@@H]1[C@H]([C@@H]([C@](O1)(CO)O)O)O)O																C03461	2-trans,6-trans-Farnesal	HMDB0060356	5280598	C03461	CC(C)=CCC\C(C)=C\CC\C(C)=C\C=O		C00418
C03428	Presqualene diphosphate	HMDB0001278	5280592	C03428	CC(=CCC/C(=C/CC/C(=C/[C@H]1[C@@H]([C@@]1(C)CC/C=C(\C)/CCC=C(C)C)COP(=O)(O)OP(=O)(O)O)/C)/C)C		C20700	(3E,7E)-4,8,12-Trimethyl-1,3,7,11-tridecatetraene	HMDB0034498	13941492	C20700	CC(C)=CCC\C(C)=C/CC\C(C)=C\C=C									C21016	Ophthalmic acid	HMDB0005765	7018721	C21016	CC[C@@H](C(=O)NCC(=O)O)NC(=O)CC[C@@H](C(=O)O)N																C04785	13(S)-HPOT	METPA0543	NA	C04785	NA		C06095
C01533	Syringin	METPA1704	NA	C01533	NA		C02273	Digalacturonic acid	HMDB0039721	6857565	C02273	OC1OC(C(OC2OC(C(O)C(O)C2O)C(O)=O)C(O)C1O)C(O)=O									C01100	L-Histidinol phosphate	METPA0128	NA	C01100	NA																C01226	12-OPDA	METPA0152	NA	C01226	NA		C11860
C18325	N1-trans-Feruloylagmatine	HMDB0037107	46173376	C18325	COC1=CC(\C=C\C(=O)NCCCCNC(N)=N)=CC=C1O		C00921	7,8-Dihydropteroic acid	HMDB0001412	170	C00921	C1C(=NC2=C(N1)NC(=NC2=O)N)CNC3=CC=C(C=C3)C(=O)O									C01417	Cyanate	HMDB0002078	105034	C01417	C(#N)[O-]																C16324	9,10-EOT	METPA1281	NA	C16324	NA		C06094
C08639	Cyanin	METPA1737	NA	C08639	NA		C00078	L-Tryptophan	HMDB0000929	6305	C00078	C1=CC=C2C(=C1)C(=CN2)C[C@@H](C(=O)O)N									C17743	Bisdemethoxycurcumin	HMDB0002114	5315472	C17743	C1=CC(=CC=C1/C=C/C(=O)CC(=O)/C=C/C2=CC=C(C=C2)O)O																C11831	Divinylprotochlorophyllide	METPA1061	NA	C11831	NA		C06001
C16321	9(S)-HPOT	METPA1278	NA	C16321	NA		C00064	L-Glutamine	HMDB0000641	5961	C00064	C(CC(=O)N)[C@@H](C(=O)O)N									C16911	Afzelin	NA	96023404	C16911	NA																C00921	7,8-Dihydropteroic acid	HMDB0001412	170	C00921	C1C(=NC2=C(N1)NC(=NC2=O)N)CNC3=CC=C(C=C3)C(=O)O		C05984
C05819	Menaquinol	HMDB0060487	5280839	C05819	CC(C)=CCC\C(C)=C\CC1=C(O)C2=CC=CC=C2C(O)=C1C		C21029	(R)-3-Ureidoisobutyrate	NA	254816254	C21029	NA																														C00909	Leukotriene A4	HMDB0001337	5280383	C00909	CCCCC/C=C\C/C=C\C=C\C=C\[C@H]1[C@@H](O1)CCCC(=O)O		C01118
C05909	Leucodelphinidin	METPA1713	NA	C05909	NA		C21028	(R)-5,6-Dihydrothymine	NA	254816253	C21028	NA																														C11875	ent-7alpha-Hydroxykaur-16-en-19-oic acid	METPA1652	NA	C11875	NA		C01179
C04734	Phosphoribosyl formamidocarboxamide	HMDB0001439	166760	C04734	C1=NC(=C(N1[C@H]2[C@@H]([C@@H]([C@H](O2)COP(=O)(O)O)O)O)NC=O)C(=O)N		C05715	gamma-Amino-gamma-cyanobutanoate	METPA0649	NA	C05715	NA																														C05966	15(S)-HPETE	HMDB0004244	5280893	C05966	CCCCC[C@@H](/C=C/C=C\C/C=C\C/C=C\CCCC(=O)O)OO		C03089
C02887	Sinapoyl malate	METPA1707	NA	C02887	NA		C05951	Leukotriene D4	HMDB0003080	6435286	C05951	CCCCC/C=C\C/C=C\C=C\C=C\[C@H]([C@H](CCCC(=O)O)O)SCC(C(=O)NCC(=O)O)N																														C05356	5(S)-Hydroperoxyeicosatetraenoic acid	HMDB0001193	5280778	C05356	CCCCC/C=C\C/C=C\C/C=C\C=C\[C@H](CCCC(=O)O)OO		C05350
C05911	Pentahydroxyflavanone	METPA1717	NA	C05911	NA		C01762	Xanthosine	HMDB0000299	64959	C01762	C1=NC2=C(N1[C@H]3[C@@H]([C@@H]([C@H](O3)CO)O)O)NC(=O)NC2=O																														C02165	Leukotriene B4	HMDB0001085	5283128	C02165	CCCCC/C=C\C[C@H](/C=C/C=C/C=C\[C@H](CCCC(=O)O)O)O		C05634
C01617	Taxifolin	METPA0191	NA	C01617	NA		C09332	Tetrahydrofolyl-[Glu](2)	HMDB0006825	442163	C09332	C1C(NC2=C(N1)NC(=NC2=O)N)CNC3=CC=C(C=C3)C(=O)NC(CCC(=O)NC(CCC(=O)O)C(=O)O)C(=O)O																														C10287	4-[(E)-2-(3,5-dimethoxyphenyl)ethenyl]phenol	HMDB0130987	5281727	C10287	[H]\C(=C(\[H])C1=CC(OC)=CC(OC)=C1)C1=CC=C(O)C=C1		C00954
C08362	Palmitoleic acid	HMDB0003229	5312427	C08362	CCCCCC/C=C\CCCCCCCC(=O)O		C16405	Homoeriodictyol chalcone	METPA1731	NA	C16405	NA																														C05839	cis-beta-D-Glucosyl-2-hydroxycinnamate	HMDB0060077	5316113	C05839	OC[C@H]1O[C@@H](OC2=CC=CC=C2\C=C/C(O)=O)[C@H](O)[C@@H](O)[C@@H]1O		C01197
C00249	Palmitic acid	HMDB0000220	985	C00249	CCCCCCCCCCCCCCCC(=O)O		C12208	3-O-p-Coumaroylquinic acid	HMDB0029681	9945785	C12208	O[C@@H]1C[C@@](O)(C[C@@H](OC(=O)\C=C\C2=CC=C(O)C=C2)[C@H]1O)C(O)=O																														C00148	L-Proline	HMDB0000162	145742	C00148	C1C[C@H](NC1)C(=O)O		C05345
C00427	Prostaglandin H2	HMDB0001381	445049	C00427	CCCCC[C@@H](/C=C/[C@H]1[C@H]2C[C@@H]([C@@H]1C/C=C\CCCC(=O)O)OO2)O		C02947	4-Coumaroylshikimate	METPA1693	NA	C02947	NA																														C01801	Deoxyribose	HMDB0003224	22833604	C01801	C1[C@H]([C@@H](O[C@@H]1O)CO)O		C00668
C00584	Prostaglandin E2	HMDB0001220	5283116	C00584	CCCCC[C@@H](/C=C/[C@H]1[C@@H](CC(=O)[C@@H]1C/C=C\CCCC(=O)O)O)O		C14153	Alpha-Tocotrienol	HMDB0006327	5282347	C14153	CC1=C(C(=C2CC[C@@](OC2=C1C)(C)CC/C=C(\C)/CC/C=C(\C)/CCC=C(C)C)C)O																														C00141	Alpha-ketoisovaleric acid	HMDB0000019	49	C00141	CC(C)C(=O)C(=O)O		C00103
C11854	Gibberellin A51-catabolite	METPA1658	NA	C11854	NA		C18151	7(1)-Hydroxychlorophyll a	NA	96024368	C18151	NA																														C04272	(R)-2,3-Dihydroxy-isovalerate	HMDB0012141	440279	C04272	CC(C)([C@H](C(=O)O)O)O		C01172
C00859	Gibberellin A1	METPA0089	NA	C00859	NA		C11242	Bacterio-chlorophyll a	MA3TEM078	13420	C11242	C1CCCCCC(=O)CCCC1																														C05576	3,4-Dihydroxyphenylglycol	HMDB0000318	91528	C05576	C1=CC(=C(C=C1C(CO)O)O)O		C00275
C11868	Gibberellin A34	METPA1644	NA	C11868	NA		C08814	Brassinolide	NA	11007	C08814	NA																														C12205	5-Hydroxyconiferyl alcohol	HMDB0060398	5282095	C12205	COC1=CC(\C=C\CO)=CC(O)=C1O		C00636
C06096	Gibberellin A29	METPA1656	NA	C06096	NA		C19873	26-Hydroxycastasterone	NA	135626339	C19873	NA																														C18015	Momilactone A	NA	96024235	C18015	NA		C01094
C05366	(+)-Pinoresinol	NA	7741	C05366	NA		C06095	Gibberellin A44 diacid	METPA1647	NA	C06095	NA																														C00427	Prostaglandin H2	HMDB0001381	445049	C00427	CCCCC[C@@H](/C=C/[C@H]1[C@H]2C[C@@H]([C@@H]1C/C=C\CCCC(=O)O)OO2)O		C01097
C20455	(-)-Pinoresinol	NA	163312192	C20455	NA		C03972	Tetrahydrodipicolinate	HMDB0012289	632	C03972	C1CC(N=C(C1)C(=O)O)C(=O)O																														C00584	Prostaglandin E2	HMDB0001220	5283116	C00584	CCCCC[C@@H](/C=C/[C@H]1[C@@H](CC(=O)[C@@H]1C/C=C\CCCC(=O)O)O)O		C00446
C10497	Subaphylline	HMDB0033463	0	C10497	COC1=C(O)C=CC(\C=C/C(=O)NCCCCN)=C1		C06055	O-Phospho-4-hydroxy-L-threonine	HMDB0006802	440901	C06055	C([C@H]([C@@H](C(=O)O)N)O)OP(=O)(O)O																														C04717	13-L-Hydroperoxylinoleic acid	HMDB0003871	6437847	C04717	CCCCC[C@@H](/C=C/C=C\CCCCCCCC(=O)O)OO		C15926
C05966	15(S)-HPETE	HMDB0004244	5280893	C05966	CCCCC[C@@H](/C=C/C=C\C/C=C\C/C=C\CCCC(=O)O)OO		C16358	1-Methylxanthine	HMDB0010738	80220	C16358	CN1C(=O)C2=C(NC1=O)N=CN2																														C14827	9(S)-HPODE	HMDB0006940	6439847	C14827	CCCCC/C=C\C=C\C(CCCCCCCC(=O)O)OO		C00092
C05356	5(S)-Hydroperoxyeicosatetraenoic acid	HMDB0001193	5280778	C05356	CCCCC/C=C\C/C=C\C/C=C\C=C\[C@H](CCCC(=O)O)OO		C16353	7-Methylxanthine	HMDB0001991	68374	C16353	CN1C=NC2=C1C(=O)NC(=O)N2																														C10434	Dattelic acid	HMDB0033999	6124136	C10434	C1C(C(C(C=C1C(=O)O)O)O)OC(=O)/C=C/C2=CC(=C(C=C2)O)O		C00085
C02165	Leukotriene B4	HMDB0001085	5283128	C02165	CCCCC/C=C\C[C@H](/C=C/C=C/C=C\[C@H](CCCC(=O)O)O)O		C11521	UDP-6-sulfoquinovose	METPA1034	NA	C11521	NA																														C00482	Sinapic acid	HMDB0032616	637775	C00482	COC1=CC(=CC(=C1O)OC)/C=C/C(=O)O		C03862
C19620	9,10-Epoxystearic acid	HMDB0061650	15868	C19620	CCCCCCCCC1OC1CCCCCCCC(O)=O		C15672	Heme O	HMDB0001162	0	C15672	CC(C)=CCC\C(C)=C\CC\C(C)=C\CCC(O)C1=C(C)/C2=C/C3=N/C(=C\C4=C(CCC(O)=O)C(C)=C5/C=C6\N=C(\C=C\1/N\2[Fe]N45)C(C)=C6C=C)/C(CCC(O)=O)=C3C																														C06429	Docosahexaenoic acid	HMDB0002183	445580	C06429	CC/C=C\C/C=C\C/C=C\C/C=C\C/C=C\C/C=C\CCC(=O)O		C03546
C00909	Leukotriene A4	HMDB0001337	5280383	C00909	CCCCC/C=C\C/C=C\C=C\C=C\[C@H]1[C@@H](O1)CCCC(=O)O		C15670	Chenodeoxyglycocholoyl-CoA	HMDB0006897	440685	C15670	CC(CCC(=O)SCCNC(=O)CCNC(=O)C(C(C)(C)COP(=O)(O)OP(=O)(O)OC[C@@H]1[C@H]([C@H]([C@@H](O1)N2C=NC3=C2N=CN=C3N)O)OP(=O)(O)O)O)C4CCC5[C@@]4(CCC6C5[C@@H](C[C@H]7[C@@]6(CC[C@H](C7)O)C)O)C																														C01674	Chitobiose	HMDB0003556	22833609	C01674	CC(=O)N[C@@H]1[C@H]([C@@H]([C@H](O[C@H]1O)CO)O[C@H]2[C@@H]([C@H]([C@@H]([C@H](O2)CO)O)O)NC(=O)O)O		C04006
C11875	ent-7alpha-Hydroxykaur-16-en-19-oic acid	METPA1652	NA	C11875	NA		C01051	Uroporphyrinogen III	HMDB0001086	1179	C01051	C1C2=C(C(=C(N2)CC3=C(C(=C(N3)CC4=C(C(=C(N4)CC5=C(C(=C1N5)CCC(=O)O)CC(=O)O)CC(=O)O)CCC(=O)O)CC(=O)O)CCC(=O)O)CC(=O)O)CCC(=O)O																														C16448	Dihydrozeatin-O-glucoside	NA	47205744	C16448	NA		C01177
C04742	15(S)-HETE	HMDB0003876	9966861	C04742	CCCCC[C@@H](/C=C/C=C\C/C=C\C/C=C\CCCC(=O)O)O		C05766	Uroporphyrinogen I	HMDB0002211	440775	C05766	C1C2=C(C(=C(N2)CC3=C(C(=C(N3)CC4=C(C(=C(N4)CC5=C(C(=C1N5)CC(=O)O)CCC(=O)O)CC(=O)O)CCC(=O)O)CC(=O)O)CCC(=O)O)CC(=O)O)CCC(=O)O																														C08281	Behenic acid	HMDB0000944	8215	C08281	CCCCCCCCCCCCCCCCCCCCCC(=O)O		C17230
C04805	5-HETE	HMDB0011134	5280733	C04805	CCCCC/C=C\C/C=C\C/C=C\C=C\[C@H](CCCC(=O)O)O		C01120	Sphinganine 1-phosphate	HMDB0001383	644260	C01120	CCCCCCCCCCCCCCC[C@H]([C@H](COP(=O)(O)O)N)O																														C11874	Kaur-16-en-18-oic acid	METPA1653	NA	C11874	NA		C17231
C18218	16-Hydroxy hexadecanoic acid	HMDB0006294	7058075	C18218	C(CCCCCCCC(=O)[O-])CCCCCCCO		C00647	Pyridoxamine 5'-phosphate	HMDB0001555	1053	C00647	CC1=NC=C(C(=C1O)CN)COP(=O)(O)O																														C20149	9beta-Pimara-7,15-dien-19-oate	NA	135626609	C20149	NA		C04732
C17248	4-Methylthiobutyl-desulfoglucosinolate	METPA1754	NA	C17248	NA		C00526	Deoxyuridine	HMDB0000012	13712	C00526	C1[C@@H]([C@H](O[C@H]1N2C=CC(=O)NC2=O)CO)O																														C20208	syn-Stemoden-19-oate	NA	163311951	C20208	NA		C00621
C16334	3-Oxo-OPC6-CoA	HMDB0060376	71448915	C16334	CC\C=C/C[C@H]1[C@@H](CCCC(=O)CC(=O)SCCN=C(O)CCN=C(O)[C@H](O)C(C)(C)COP(O)(=O)OP(O)(=O)OC[C@H]2O[C@H]([C@H](O)[C@@H]2OP(O)(O)=O)N2C=NC3=C(N)N=CN=C23)CCC1=O		C17621	10-Hydroxygeraniol	METPA1453	NA	C17621	NA																														C21826	ent-3beta-Hydroxycassa-12,15-dien-2-one	NA	NA	C21826	NA		C00345
C00504	Folic acid	HMDB0000121	6037	C00504	C1=CC(=CC=C1C(=O)N[C@@H](CCC(=O)O)C(=O)O)NCC2=CN=C3C(=N2)C(=O)N=C(N3)N		C00631	2-Phospho-D-glyceric acid	HMDB0003391	439278	C00631	C([C@H](C(=O)O)OP(=O)(O)O)O																														C06428	Eicosapentaenoic acid	HMDB0001999	446284	C06428	CC/C=C\C/C=C\C/C=C\C/C=C\C/C=C\CCCC(=O)O		C01077
C06124	Sphingosine 1-phosphate	HMDB0000277	5353956	C06124	CCCCCCCCCCCCC/C=C/C(C(COP(=O)(O)O)N)O		C00197	3-Phosphoglyceric acid	HMDB0060180	439183	C00197	O[C@H](COP(O)(O)=O)C(O)=O																														C08491	Jasmonic acid	HMDB0032797	5281166	C08491	CC/C=C\C[C@@H]1[C@H](CCC1=O)CC(=O)O		C00956
C19623	22-Hydroxydocosanoate	NA	135626111	C19623	NA		C00988	Phosphoglycolic acid	HMDB0000816	529	C00988	C(C(=O)O)OP(=O)(O)O																														C05437	Zymosterol intermediate 2	HMDB0006271	92746	C05437	C[C@H](CCC=C(C)C)[C@H]1CC[C@@H]2[C@@]1(CCC3=C2CC[C@@H]4[C@@]3(CC[C@@H](C4)O)C)C		C00534
C05623	Quercetin 3-glucoside	HMDB0037362	5280804	C05623	OC[C@H]1O[C@@H](OC2=C(OC3=C(C(O)=CC(O)=C3)C2=O)C2=CC=C(O)C(O)=C2)[C@H](O)[C@@H](O)[C@@H]1O		C05623	Quercetin 3-glucoside	HMDB0037362	5280804	C05623	OC[C@H]1O[C@@H](OC2=C(OC3=C(C(O)=CC(O)=C3)C2=O)C2=CC=C(O)C(O)=C2)[C@H](O)[C@@H](O)[C@@H]1O																														C01164	7-Dehydrocholesterol	HMDB0000032	439423	C01164	C[C@H](CCCC(C)C)[C@H]1CC[C@@H]2[C@@]1(CC[C@H]3C2=CC=C4[C@@]3(CC[C@@H](C4)O)C)C		C00417
C05983	Propinol adenylate	HMDB0006806	440863	C05983	CCC(=O)OP(=O)(O)OC[C@@H]1[C@H]([C@H]([C@@H](O1)N2C=NC3=C2N=CN=C3N)O)O		C01613	Stachyose	HMDB0003553	439531	C01613	C([C@@H]1[C@@H]([C@@H]([C@H]([C@H](O1)OC[C@@H]2[C@@H]([C@@H]([C@H]([C@H](O2)OC[C@@H]3[C@H]([C@@H]([C@H]([C@H](O3)O[C@]4([C@H]([C@@H]([C@H](O4)CO)O)O)CO)O)O)O)O)O)O)O)O)O)O																														C05439	5a-Cholesta-7,24-dien-3b-ol	HMDB0006842	440670	C05439	C[C@H](CCC=C(C)C)[C@H]1CC[C@@H]2[C@@]1(CCC3C2=CC[C@@H]4[C@@]3(CC[C@@H](C4)O)C)C		C05422
C22119	3beta-Hydroxyergosta-7,24(24(1))-dien-4alpha-carboxylate	NA	NA	C22119	NA		C20258	HTPA	MA3TEM047	163311998	C20258	NA																														C18151	7(1)-Hydroxychlorophyll a	NA	96024368	C18151	NA		C00385
C16430	trans-Zeatin riboside monophosphate	METPA1690	NA	C16430	NA		C02034	Gibberellin A19	HMDB0036896	4632015	C02034	CC1(CCCC2(C=O)C3CCC4(O)CC3(CC4=C)C(C12)C(O)=O)C(O)=O																														C11242	Bacterio-chlorophyll a	MA3TEM078	13420	C11242	C1CCCCCC(=O)CCCC1		C00178
C16911	Afzelin	NA	96023404	C16911	NA		C11861	Gibberellin A124	HMDB0037103	0	C11861	[H][C@@]12C[C@H](O)[C@]3(O)C[C@]1(CC3=C)[C@@H](C(O)=O)[C@@]1([H])[C@@]22CCC[C@]1(C)C(=O)OC2																														C01189	Lathosterol	HMDB0001170	65728	C01189	C[C@H](CCCC(C)C)[C@H]1CC[C@@H]2[C@@]1(CC[C@H]3C2=CC[C@@H]4[C@@]3(CC[C@@H](C4)O)C)C		C02835
C12137	Pelargonidin 3-O-glucoside	METPA1087	NA	C12137	NA		C18167	Secoisolariciresinol	HMDB0013692	65373	C18167	COC1=C(C=CC(=C1)C[C@@H](CO)[C@@H](CC2=CC(=C(C=C2)O)OC)CO)O																														C03845	5a-Cholest-8-en-3b-ol	HMDB0006841	101770	C03845	C[C@H](CCCC(C)C)[C@H]1CC[C@@H]2[C@@]1(CCC3=C2CC[C@@H]4[C@@]3(CC[C@@H](C4)O)C)C
C08814	Brassinolide	NA	11007	C08814	NA		C20456	(+)-Secoisolariciresinol	NA	163312193	C20456	NA																														C00187	Cholesterol	HMDB0000067	5997	C00187	C[C@H](CCCC(C)C)[C@H]1CC[C@@H]2[C@@]1(CC[C@H]3[C@H]2CC=C4[C@@]3(CCC(C4)O)C)C
C19873	26-Hydroxycastasterone	NA	135626339	C19873	NA		C05345	Beta-D-Fructose 6-phosphate	HMDB0003971	440641	C05345	C([C@@H]1[C@H]([C@@H]([C@](O1)(CO)O)O)O)OP(=O)(O)O																														C15800	3-Dehydro-6-deoxoteasterone	METPA1210	NA	C15800	NA
C04823	SAICAR	HMDB0000797	160666	C04823	C1=NC(=C(N1[C@H]2[C@@H]([C@@H]([C@H](O2)COP(=O)(O)O)O)O)N)C(=O)N[C@@H](CC(=O)O)C(=O)O		C00668	Glucose 6-phosphate	HMDB0001401	5958	C00668	OC1O[C@H](COP(O)(O)=O)[C@@H](O)[C@H](O)[C@H]1O																														C00931	Porphobilinogen	HMDB0000245	1021	C00931	C1=C(C(=C(N1)CN)CC(=O)O)CCC(=O)O
C05427	Phytyl diphosphate	NA	7791	C05427	NA		C00103	Glucose 1-phosphate	HMDB0001586	439165	C00103	C([C@@H]1[C@H]([C@@H]([C@H](C(O1)OP(=O)(O)O)O)O)O)O																														C00353	Geranylgeranyl-PP	HMDB0004486	447277	C00353	CC(=CCC/C(=C/CC/C(=C/CC/C(=C/COP(=O)(O)OP(=O)(O)O)/C)/C)/C)C
C05307	Chlorophyll b	HMDB0031146	136969248	C05307	[Mg++].[H]\C(COC(=O)CCC1C(C)C2=N\C1=C1/C(C(=O)OC)C(=O)C3=C(C)C(=CC4=C(CC)C(=CO)C(C=C5[N-]C(=C2)C(C)=C5C=C)=N4)N=C13)=C(\C)CCCC(C)CCCC(C)CCCC(C)C		C01172	Beta-D-Glucose 6-phosphate	HMDB0003498	439427	C01172	C([C@@H]1[C@H]([C@@H]([C@H]([C@@H](O1)O)O)O)O)OP(=O)(O)O																														C06089	ent-Copalyl diphosphate	METPA0756	NA	C06089	NA
C03479	Folinic acid	HMDB0001562	143	C03479	C1C(N(C2=C(N1)NC(=NC2=O)N)C=O)CNC3=CC=C(C=C3)C(=O)NC(CCC(=O)O)C(=O)O		C00275	Mannose 6-phosphate	HMDB0001078	439198	C00275	C([C@@H]1[C@H]([C@@H]([C@@H]([C@@H](O1)O)O)O)O)OP(=O)(O)O																														C15803	6alpha-Hydroxy-castasterone	METPA1213	NA	C15803	NA
C00234	10-Formyltetrahydrofolate	HMDB0000972	135450591	C00234	C1C(NC2=C(N1)NC(=NC2=O)N)CN(C=O)C3=CC=C(C=C3)C(=O)N[C@@H](CCC(=O)O)C(=O)O		C00636	D-Mannose 1-phosphate	HMDB0006330	644175	C00636	C([C@@H]1[C@H]([C@@H]([C@@H](C(O1)OP(=O)(O)O)O)O)O)O																														G00093	NA	NA	NA	NA	NA
C00828	Vitamin K2	HMDB0030017	5283547	C00828	CC1=C(C(=O)C2=CC=CC=C2C1=O)C/C=C(\C)/CC/C=C(\C)/CC/C=C(\C)/CC/C=C(\C)/CC/C=C(\C)/CCC=C(C)C		C01094	3a,6b,7a,12a-Tetrahydroxy-5b-cholanoic acid	HMDB0000399	5283899	C01094	C[C@H](CCC(=O)O)[C@H]1CC[C@@H]2[C@@]1([C@H](C[C@H]3[C@H]2[C@@H]([C@H]([C@H]4[C@@]3(CC[C@H](C4)O)C)O)O)O)C																														C20693	Carlactone	NA	172232413	C20693	NA
C19874	26-Hydroxybrassinolide	NA	135626340	C19874	NA		C01097	D-Tagatose 6-phosphate	HMDB0006873	439396	C01097	C([C@@H]1[C@@H]([C@@H](C(O1)(CO)O)O)O)OP(=O)(O)O																														C21016	Ophthalmic acid	HMDB0005765	7018721	C21016	CC[C@@H](C(=O)NCC(=O)O)NC(=O)CC[C@@H](C(=O)O)N
C15967	Phoenicoxanthin	METPA1673	NA	C15967	NA		C00446	Galactose 1-phosphate	HMDB0000645	123912	C00446	C([C@@H]1[C@@H]([C@@H]([C@H]([C@H](O1)OP(=O)(O)O)O)O)O)O																														C09826	Pinobanksin	METPA1712	NA	C09826	NA
C08586	delta-Carotene	HMDB0036925	0	C08586	CC(C)=CCC\C(C)=C/C=C/C(/C)=C/C=C/C(/C)=C/C=C/C=C(\C)/C=C/C=C(/C)\C=C\C1C(C)=CCCC1(C)C		C15926	L-Galactose 1-phosphate	METPA1227	NA	C15926	NA																														C00378	Thiamine	HMDB0000235	1130	C00378	CC1=C(SC=[N+]1CC2=CN=C(N=C2N)C)CCO
C05433	Alpha-Carotene	HMDB0003993	4369188	C05433	CC1=C(C(CCC1)(C)C)/C=C/C(=C/C=C/C(=C/C=C/C=C(\C)/C=C/C=C(\C)/C=C/C2C(=CCCC2(C)C)C)/C)/C		C00092	Glucose 6-phosphate	HMDB0001401	5958	C00092	C([C@@H]1[C@H]([C@@H]([C@H](C(O1)O)O)O)O)OP(=O)(O)O																														C11512	Methyl jasmonate	HMDB0036583	5367719	C11512	CC\C=C/C[C@@H]1[C@@H](CC(=O)OC)CCC1=O
C02094	B-Carotene	HMDB0000561	5280489	C02094	CC1=C(C(CCC1)(C)C)/C=C/C(=C/C=C/C(=C/C=C/C=C(/C=C/C=C(/C=C/C2=C(CCCC2(C)C)C)\C)\C)/C)/C		C00085	Fructose 6-phosphate	HMDB0000124	69507	C00085	C([C@H]([C@H]([C@@H](C(=O)CO)O)O)O)OP(=O)(O)O																														C00978	N-Acetylserotonin	HMDB0001238	903	C00978	CC(=O)NCCC1=CNC2=C1C=C(C=C2)O
C05435	gamma-Carotene	HMDB0112262	5280791	C05435	CC(C)=CCC\C(C)=C\C=C\C(\C)=C\C=C\C(\C)=C\C=C\C=C(/C)\C=C\C=C(/C)\C=C\C1=C(C)CCCC1(C)C		C03862	Dolichyl phosphate D-mannose	HMDB0000994	3246168	C03862	C([C@@H]1[C@H]([C@@H]([C@@H]([C@@H](O1)OP(=O)(O)O)O)O)O)O																														C03972	Tetrahydrodipicolinate	HMDB0012289	632	C03972	C1CC(N=C(C1)C(=O)O)C(=O)O
C05432	Lycopene	HMDB0003000	53477748	C05432	CC(=CCC/C(=C/C=C/C(=C/C=C/C(=C/C=C/C=C(/C=C/C=C(/C=C/C=C(/CCC=C(C)C)\C)\C)\C)/C)/C)/C)C		C00357	N-Acetyl-D-Glucosamine 6-Phosphate	HMDB0001062	440996	C00357	CC(=O)N[C@@H]1[C@H]([C@@H]([C@H](OC1O)COP(=O)(O)O)O)O																														C00632	3-Hydroxyanthranilic acid	HMDB0001476	86	C00632	C1=CC(=C(C(=C1)O)N)C(=O)O
C15858	Prolycopene	HMDB0035776	10918539	C15858	CC(=CCC/C(=C/C=C\C(=C/C=C/C(=C/C=C/C=C(/C=C/C=C(\C=C/C=C(/CCC=C(C)C)\C)/C)\C)/C)\C)/C)C		C04501	N-Acetyl-glucosamine 1-phosphate	HMDB0001367	7115	C04501	CC(=O)N[C@@H]1[C@@H](O)[C@H](O)[C@@H](CO)OC1OP(O)(O)=O																														C00108	2-Aminobenzoic acid	HMDB0001123	227	C00108	C1=CC=C(C(=C1)C(=O)O)N
C20484	9-cis-beta-Carotene	HMDB0112264	9828626	C20484	C/C(/C=C/C=C(/C)\C=C\C1=C(C)CCCC1(C)C)=C\C=C\C=C(/C)\C=C\C=C(/C)\C=C\C1=C(C)CCCC1(C)C		C03546	D-Myo-inositol 4-phosphate	HMDB0001313	440043	C03546	O[C@@H]1[C@H](O)[C@H](O)[C@@H](OP(O)(O)=O)[C@H](O)[C@H]1O																														C00568	p-Aminobenzoic acid	HMDB0001392	978	C00568	C1=CC(=CC=C1C(=O)O)N
C16276	epsilon-Carotene	METPA1272	NA	C16276	NA		C04006	1D-myo-Inositol 3-phosphate	HMDB0006814	440194	C04006	[C@H]1([C@@H](C([C@H]([C@@H](C1O)O)O)OP(=O)(O)O)O)O																														C00027	Hydrogen peroxide	HMDB0003125	784	C00027	OO
C01079	Protoporphyrinogen IX	HMDB0001097	121893	C01079	CC1=C2CC3=C(C(=C(N3)CC4=C(C(=C(N4)CC5=C(C(=C(N5)CC(=C1CCC(=O)O)N2)CCC(=O)O)C)C=C)C)C=C)C		C01177	Myo-inositol 1-phosphate	HMDB0000213	NA	C01177	O[C@H]1[C@H](O)[C@H](O)[C@H](OP(O)(O)=O)[C@@H](O)[C@@H]1O																														C04732	5-Amino-6-ribitylamino uracil	HMDB0011106	221	C04732	C(C(C(C(CO)O)O)O)NC1=C(C(=O)NC(=O)N1)N
C02191	Protoporphyrin IX	HMDB0000241	NA	C02191	CC1=C(CCC(O)=O)/C2=C/C3=N/C(=C\C4=C(C)C(C=C)=C(N4)/C=C4\N=C(\C=C\1/N\2)C(C=C)=C4C)/C(C)=C3CCC(O)=O		C02029	Dihydrozeatin	HMDB0012215	439631	C02029	C[C@@H](CCNC1=NC=NC2=C1NC=N2)CO																														C00149	L-Malic acid	HMDB0000156	222656	C00149	C([C@@H](C(=O)O)O)C(=O)O
C18070	N1,N5,N10-Tricaffeoyl spermidine	METPA1710	NA	C18070	NA		C00415	Dihydrofolic acid	HMDB0001056	98792	C00415	C1C(=NC2=C(N1)NC(=NC2=O)N)CNC3=CC=C(C=C3)C(=O)N[C@@H](CCC(=O)O)C(=O)O																														C00470	Pectic acid	HMDB0003363	445929	C00470	[C@@H]1([C@H]([C@H](O[C@@H]([C@@H]1O)O)C(=O)O)O)O
C08725	Pelargonin	HMDB0033681	4999763	C08725	C1=CC(=CC=C1C2=C(C=C3C(=CC(=CC3=[O+]2)O)OC4C(C(C(C(O4)CO)O)O)O)OC5C(C(C(C(O5)CO)O)O)O)O		C00859	Gibberellin A1	METPA0089	NA	C00859	NA																														C00191	D-Glucuronic acid	HMDB0000127	94715	C00191	[C@@H]1([C@@H]([C@H](O[C@@H]([C@@H]1O)O)C(=O)O)O)O
C09826	Pinobanksin	METPA1712	NA	C09826	NA		C06096	Gibberellin A29	METPA1656	NA	C06096	NA																														C01040	L-Gulonolactone	HMDB0003466	439373	C01040	C([C@@H]([C@@H]1[C@@H]([C@@H](C(=O)O1)O)O)O)O
C03263	Coproporphyrinogen III	HMDB0001261	321	C03263	CC1=C2CC3=C(C(=C(N3)CC4=C(C(=C(N4)CC5=C(C(=C(N5)CC(=C1CCC(=O)O)N2)C)CCC(=O)O)C)CCC(=O)O)CCC(=O)O)C		C11868	Gibberellin A34	METPA1644	NA	C11868	NA																														C01115	L-Galactono-1,4-lactone	METPA0133	NA	C01115	NA
C05768	Coproporphyrinogen I	HMDB0002158	68271	C05768	CC1=C2CC3=C(C(=C(N3)CC4=C(C(=C(N4)CC5=C(C(=C(N5)CC(=C1CCC(=O)O)N2)C)CCC(=O)O)C)CCC(=O)O)C)CCC(=O)O		C12248	5-hydroxy-2-oxo-4-ureido-2,5-dihydro-1H-imidazole-5-carboxylate	HMDB0059663	443736	C12248	NC(=O)NC1=NC(=O)NC1(O)C(O)=O																														C06032	D-erythro-3-Methylmalate	METPA0739	NA	C06032	NA
C18155	bacteriochlorophyllide a	MA3TEM076	96024372	C18155	CC1=C(C=C2[C@H](NCCC2=C1)/C=C/C3=CC=NC=C3)C		C16540	7(1)-Hydroxychlorophyllide a	NA	51090869	C16540	NA																														C02938	3-Indoleacetonitrile	HMDB0006524	351795	C02938	C1=CC=C2C(=C1)C(=CN2)CC#N
C03427	Prephytoene diphosphate	HMDB0003023	24883415	C03427	CC(=CCC/C(=C/CC/C(=C/CC/C(=C/[C@@H]1[C@H]([C@]1(C)CC/C=C(\C)/CC/C=C(\C)/CCC=C(C)C)COP(=O)(O)OP(=O)(O)O)/C)/C)/C)C		C18156	Bacteriochlorophyllide b	MA3TEM077	96024373	C18156	CC1=C(C2=C(CCN[C@H]2C3=CNC(=O)C(=C3)Cl)C=C1)C																														C02630	2-Hydroxyglutarate	HMDB0059655	43	C02630	OC(CCC(O)=O)C(O)=O
C17570	2-Methyl-6-solanyl-1,4-benzoquinol	METPA1452	NA	C17570	NA		C02504	2-Isopropylmalic acid	HMDB0000402	5280523	C02504	CC(C)[C@@](CC(=O)O)(C(=O)O)O																														C00299	Uridine	HMDB0000296	6029	C00299	C1=CN(C(=O)NC1=O)[C@H]2[C@@H]([C@@H]([C@H](O2)CO)O)O
C15970	Abscisic acid glucose ester	METPA1229	NA	C15970	NA		C04411	3-Isopropylmalate	HMDB0012156	5462261	C04411	CC(C)[C@@H]([C@H](C(=O)O)O)C(=O)O																														C02576	Perillyl aldehyde	HMDB0003647	16441	C02576	CC(=C)C1CCC(=CC1)C=O
C00864	Pantothenic acid	HMDB0000210	6613	C00864	CC(C)(CO)C(C(=O)NCCC(=O)O)O		C00036	Oxalacetic acid	HMDB0000223	970	C00036	C(C(=O)C(=O)O)C(=O)O																														C01103	Orotidylic acid	HMDB0000218	160617	C01103	C1=C(N(C(=O)NC1=O)[C@H]2[C@@H]([C@@H]([C@H](O2)COP(=O)(O)O)O)O)C(=O)O
C00371	Cis-zeatin	HMDB0012204	449093	C00371	C/C(=C\CNC1=NC=NC2=C1NC=N2)/CO		C00026	Oxoglutaric acid	HMDB0000208	51	C00026	C(CC(=O)O)C(=O)C(=O)O																														C00555	4-Aminobutyraldehyde	NA	3835	C00555	NA
C08276	3-Methylthiopropionic acid	HMDB0001527	563	C08276	CSCCC(=O)O		G00145	(GlcN)1 (Ino(acyl)-P)1	METPA1583	NA	G00145	NA																														C00242	Guanine	HMDB0000132	764	C00242	C1=NC2=C(N1)C(=O)N=C(N2)N
C00365	dUMP	HMDB0001409	65063	C00365	C1[C@@H]([C@H](O[C@H]1N2C=CC(=O)NC2=O)COP(=O)(O)O)O		C05913	(3Z)-Phytochromobilin	METPA0710	NA	C05913	NA																														C11832	Divinyl chlorophyllide a	METPA1062	NA	C11832	NA
C00105	Uridine 5'-monophosphate	HMDB0000288	6030	C00105	C1=CN(C(=O)NC1=O)[C@H]2[C@@H]([C@@H]([C@H](O2)COP(=O)(O)O)O)O		C00974	Aromadendrin	HMDB0030847	662	C00974	C1=CC(=CC=C1C2C(C(=O)C3=C(C=C(C=C3O2)O)O)O)O																														C11830	13(1)-Oxo-magnesium-protoporphyrin IX 13-monomethyl ester	METPA1060	NA	C11830	NA
C01168	Pseudouridine 5'-phosphate	HMDB0001271	439424	C01168	C1=C(C(=O)NC(=O)N1)[C@H]2[C@@H]([C@@H]([C@H](O2)COP(=O)(O)O)O)O		C05631	Eriodictyol	HMDB0005810	440735	C05631	C1[C@H](OC2=CC(=CC(=C2C1=O)O)O)C3=CC(=C(C=C3)O)O																														C02880	Protochlorophyllide	HMDB0031148	NA	C02880	[Mg++].[H]\C-1=C2\[N-]\C(=C([H])/C3=N/C(/C(CCC([O-])=O)=C3C)=C3\C(C(=O)OC)C(=O)C4=C(C)\C(\N=C34)=C([H])\C3=C(C=C)C(C)=C-1N3)C(C)=C2C=C
C00299	Uridine	HMDB0000296	6029	C00299	C1=CN(C(=O)NC1=O)[C@H]2[C@@H]([C@@H]([C@H](O2)CO)O)O		C01378	Fustin	METPA1727	NA	C01378	NA																														C03722	Quinolinic acid	HMDB0000232	1066	C03722	C1=CC(=C(N=C1)C(=O)O)C(=O)O
C06095	Gibberellin A44 diacid	METPA1647	NA	C06095	NA		C15525	Eriodictyol chalcone	METPA1729	NA	C15525	NA																														C00134	Putrescine	HMDB0001414	1045	C00134	C(CCN)CN
C03657	1,4-Dihydroxy-2-naphthoate	METPA0422	NA	C03657	NA		C05512	Deoxyinosine	HMDB0000071	65058	C05512	C1[C@@H]([C@H](O[C@H]1N2C=NC3=C2NC=NC3=O)CO)O																														C00188	L-Threonine	HMDB0000167	6288	C00188	C[C@H]([C@@H](C(=O)O)N)O
C05404	D-Gal alpha 1->6D-Gal alpha 1->6D-Glucose	HMDB0060468	440660	C05404	OC[C@H]1O[C@H](OC[C@H]2O[C@H](OC[C@H]3OC(O)[C@H](O)[C@@H](O)[C@@H]3O)[C@H](O)[C@@H](O)[C@H]2O)[C@H](O)[C@@H](O)[C@H]1O		C00239	dCMP	HMDB0001202	13945	C00239	C1[C@@H]([C@H](O[C@H]1N2C=CC(=NC2=O)N)COP(=O)(O)O)O																														C00263	L-Homoserine	HMDB0000719	12647	C00263	C(CO)[C@@H](C(=O)O)N
C00492	Raffinose	HMDB0003213	10542	C00492	C([C@@H]1[C@@H]([C@@H]([C@H](C(O1)OC[C@@H]2[C@H]([C@@H]([C@H](C(O2)O[C@]3([C@H]([C@@H]([C@H](O3)CO)O)O)CO)O)O)O)O)O)O)O		C00989	Gamma Hydroxybutyric Acid	HMDB0015507	3037032	C00989	C(CC(=O)[O-])CO																														C00719	Betaine	HMDB0000043	247	C00719	C[N+](C)(C)CC(=O)[O-]
C00721	Dextrin	HMDB0006857	62698	C00721	C([C@@H]1[C@H]([C@@H]([C@H](C(O1)O[C@@H]2[C@H](OC([C@@H]([C@H]2O)O)O[C@@H]3[C@H](O[C@@H]([C@@H]([C@H]3O)O)O)CO)CO)O)O)O)O		C00089	Sucrose	HMDB0000258	5988	C00089	C([C@@H]1[C@H]([C@@H]([C@H]([C@H](O1)O[C@]2([C@H]([C@@H]([C@H](O2)CO)O)O)CO)O)O)O)O																														C05519	L-Allothreonine	HMDB0004041	99289	C05519	C[C@@H]([C@@H](C(=O)O)N)O
C06196	dIMP	HMDB0006555	91531	C06196	C1[C@@H]([C@H](O[C@H]1N2C=NC3=C2NC=NC3=O)COP(=O)(O)O)O		C05402	Melibiose	HMDB0000048	440658	C05402	OC[C@H]1O[C@H](OC[C@H]2O[C@H](O)[C@H](O)[C@@H](O)[C@H]2O)[C@@H](O)[C@@H](O)[C@@H]1O																														C00183	L-Valine	HMDB0000883	6287	C00183	CC(C)[C@@H](C(=O)O)N
C03506	Indoleglycerol phosphate	METPA0401	NA	C03506	NA		C05400	Isomaltose	HMDB0002923	440656	C05400	OC[C@H]1O[C@H](OC[C@H]2O[C@H](O)[C@H](O)[C@@H](O)[C@H]2O)[C@@H](O)[C@@H](O)[C@@H]1O																														C00561	Mandelonitrile	HMDB0060486	9548674	C00561	O[C@@H](C#N)C1=CC=CC=C1
C00844	Prunasin	HMDB0034934	119033	C00844	C1=CC=C(C=C1)[C@H](C#N)O[C@H]2[C@@H]([C@H]([C@@H]([C@H](O2)CO)O)O)O		C01235	Beta-Cortol	HMDB0005821	246164	C01235	C[C@]12CC[C@H](C[C@H]1CC[C@@H]3[C@@H]2[C@H](C[C@]4([C@H]3CC[C@@]4([C@@H](CO)O)O)C)O)O																														C01210	N-Methylethanolamine phosphate	METPA0145	NA	C01210	NA
C05905	Cyanidin	HMDB0002708	68247	C05905	C1=CC(=C(C=C1C2=C(C=C3C(=CC(=CC3=[O+]2)O)O)O)O)O.[Cl-]		C00243	Alpha-Lactose	HMDB0000186	84571	C00243	C([C@@H]1[C@@H]([C@@H]([C@H]([C@@H](O1)O[C@@H]2[C@H](O[C@@H]([C@@H]([C@H]2O)O)O)CO)O)O)O)O																														C02059	Vitamin K1	HMDB0003555	5280483	C02059	CC1=C(C(=O)C2=CC=CC=C2C1=O)C/C=C(\C)/CCCC(C)CCCC(C)CCCC(C)C
C15532	N-a-Acetylcitrulline	HMDB0000856	11506771	C15532	CC(=O)NC(CCCNC(=O)N)C(=O)O		C00185	1-beta-D-Glucopyranosyl-4-D-glucopyranose	MA3TEM061	3485	C00185	C(CC=O)CC=O																														C15791	Teasterone	METPA1204	NA	C15791	NA
C17228	2-Oxo-9-methylthiononanoic acid	METPA1751	NA	C17228	NA		C01083	Trehalose	HMDB0000975	7427	C01083	C([C@@H]1[C@H]([C@@H]([C@H]([C@H](O1)O[C@@H]2[C@@H]([C@H]([C@@H]([C@H](O2)CO)O)O)O)O)O)O)O																														C15793	2-Deoxycastasterone	HMDB0034423	0	C15793	CC(C)C(C)C(O)C(O)C(C)C1CCC2C3CC(=O)C4CC(O)CCC4(C)C3CCC12C
C00008	ADP	HMDB0001341	6022	C00008	C1=NC2=C(C(=N1)N)N=CN2[C@H]3[C@@H]([C@@H]([C@H](O3)COP(=O)(O)OP(=O)(O)O)O)O		C00208	D-Maltose	HMDB0000163	10991489	C00208	C([C@@H]1[C@H]([C@@H]([C@H]([C@H](O1)O[C@@H]2[C@H](O[C@@H]([C@H]([C@H]2O)O)O)CO)O)O)O)O																														C00504	Folic acid	HMDB0000121	6037	C00504	C1=CC(=CC=C1C(=O)N[C@@H](CCC(=O)O)C(=O)O)NCC2=CN=C3C(=N2)C(=O)N=C(N3)N
C00206	dADP	HMDB0001508	53477733	C00206	C1[C@@H]([C@H](OC1N2C=NC3=C2N=CN=C3N)COP(=O)(O)OP(=O)(O)O)O		C09826	Pinobanksin	METPA1712	NA	C09826	NA																														C00606	3-Sulfinoalanine	HMDB0000996	439270	C00606	C([C@@H](C(=O)O)N)S(=O)=O
C00361	dGDP	HMDB0000960	439220	C00361	C1[C@@H]([C@H](O[C@H]1N2C=NC3=C2NC(=NC3=O)N)COP(=O)(O)OP(=O)(O)O)O		C00131	Deoxyadenosine triphosphate	HMDB0001532	15993	C00131	C1[C@@H]([C@H](O[C@H]1N2C=NC3=C2N=CN=C3N)COP(=O)(O)OP(=O)(O)OP(=O)(O)O)O																														C02631	Isopropylmaleate	HMDB0012241	5280533	C02631	CC(C)/C(=C/C(=O)O)/C(=O)O
C05993	Acetyl adenylate	HMDB0006880	440867	C05993	CC(=O)OP(=O)(O)OC[C@@H]1[C@H]([C@H]([C@@H](O1)N2C=NC3=C2N=CN=C3N)O)O		C03263	Coproporphyrinogen III	HMDB0001261	321	C03263	CC1=C2CC3=C(C(=C(N3)CC4=C(C(=C(N4)CC5=C(C(=C(N5)CC(=C1CCC(=O)O)N2)C)CCC(=O)O)C)CCC(=O)O)CCC(=O)O)C																														C01419	Cysteinylglycine	HMDB0000078	439498	C01419	C([C@@H](C(=O)NCC(=O)O)N)S
C00054	Adenosine 3',5'-diphosphate	HMDB0000061	159296	C00054	C1=NC2=C(C(=N1)N)N=CN2[C@H]3[C@@H]([C@@H]([C@H](O3)COP(=O)(O)O)OP(=O)(O)O)O		C05768	Coproporphyrinogen I	HMDB0002158	68271	C05768	CC1=C2CC3=C(C(=C(N3)CC4=C(C(=C(N4)CC5=C(C(=C(N5)CC(=C1CCC(=O)O)N2)C)CCC(=O)O)C)CCC(=O)O)C)CCC(=O)O
C17213	L-2-Amino-5-(methylthio)pentanoic acid	HMDB0030406	11298145	C17213	CSCCCC(C(=O)O)N		C01246	Dolichyl b-D-glucosyl phosphate	HMDB0001054	22833557	C01246	CC(CC/C=C(/C)\CCC=C(C)C)CCOP(=O)(O)O[C@H]1[C@@H]([C@H]([C@@H]([C@H](O1)CO)O)O)O
C08412	Glucoiberverin	METPA1765	NA	C08412	NA		C01185	Nicotinic acid mononucleotide	HMDB0001132	53477721	C01185	C1C(C=CC=[N+]1[C@H]2[C@@H]([C@@H]([C@H](O2)COP(=O)(O)[O-])O)O)C(=O)O
C00378	Thiamine	HMDB0000235	1130	C00378	CC1=C(SC=[N+]1CC2=CN=C(N=C2N)C)CCO		C05401	Galactosylglycerol	HMDB0006790	656504	C05401	C([C@@H]1[C@@H]([C@@H]([C@H]([C@@H](O1)OCC(CO)O)O)O)O)O
C17237	S-(Phenylacetothiohydroximoyl)-L-cysteine	METPA1759	NA	C17237	NA		C00311	Isocitric acid	HMDB0000193	1198	C00311	C(C(C(C(=O)O)O)C(=O)O)C(=O)O
C01051	Uroporphyrinogen III	HMDB0001086	1179	C01051	C1C2=C(C(=C(N2)CC3=C(C(=C(N3)CC4=C(C(=C(N4)CC5=C(C(=C1N5)CCC(=O)O)CC(=O)O)CC(=O)O)CCC(=O)O)CC(=O)O)CCC(=O)O)CC(=O)O)CCC(=O)O		C00158	Citric acid	HMDB0000094	311	C00158	C(C(=O)O)C(CC(=O)O)(C(=O)O)O
C05766	Uroporphyrinogen I	HMDB0002211	440775	C05766	C1C2=C(C(=C(N2)CC3=C(C(=C(N3)CC4=C(C(=C(N4)CC5=C(C(=C1N5)CC(=O)O)CCC(=O)O)CC(=O)O)CCC(=O)O)CC(=O)O)CCC(=O)O)CC(=O)O)CCC(=O)O		C01041	Ascorbic acid	HMDB0000044	54670067	C01041	C([C@@H]([C@@H]1C(=C(C(=O)O1)O)O)O)O
C20491	Delphinidin 3-O-beta-D-sambubioside	NA	172232240	C20491	NA		C02670	D-Glucurono-6,3-lactone	HMDB0006355	439782	C02670	[C@H]1([C@@H]2[C@@H]([C@H](C(=O)O2)O)O[C@H]1O)O
C04691	2-Dehydro-3-deoxy-D-arabino-heptonate 7-phosphate	METPA0533	NA	C04691	NA		C03289	L-xylo-Hexulonolactone	METPA0381	NA	C03289	NA
C00026	Oxoglutaric acid	HMDB0000208	51	C00026	C(CC(=O)O)C(=O)C(=O)O		C00818	Glucaric acid	HMDB0000663	33037	C00818	[C@H]([C@@H]([C@@H](C(=O)O)O)O)([C@H](C(=O)O)O)O
C03972	Tetrahydrodipicolinate	HMDB0012289	632	C03972	C1CC(N=C(C1)C(=O)O)C(=O)O		C02612	(R)-2-Methylmalate	METPA0308	NA	C02612	NA
C01762	Xanthosine	HMDB0000299	64959	C01762	C1=NC2=C(N1[C@H]3[C@@H]([C@@H]([C@H](O3)CO)O)O)NC(=O)NC2=O		C00295	Orotic acid	HMDB0000226	967	C00295	C1=C(NC(=O)NC1=O)C(=O)O
C05903	Kaempferol	HMDB0005801	5280863	C05903	C1=CC(=CC=C1C2=C(C(=O)C3=C(C=C(C=C3O2)O)O)O)O		C05634	5-Hydroxyindoleacetaldehyde	HMDB0004073	74688	C05634	C1=CC2=C(C=C1O)C(=CN2)CC=O
C01514	Luteolin	HMDB0005800	5280445	C01514	C1=CC(=C(C=C1C2=CC(=O)C3=C(C=C(C=C3O2)O)O)O)O		C00954	Indoleacetic acid	HMDB0000197	802	C00954	C1=CC=C2C(=C1)C(=CN2)CC(=O)O
C00032	Heme	HMDB0003178	26945	C00032	CC1=C(CCC(O)=O)C2=CC3=[N+]4C(=CC5=C(C=C)C(C)=C6C=C7C(C=C)=C(C)C8=[N+]7[Fe@]4(N2C1=C8)N56)C(C)=C3CCC(O)=O		C01233	Glycerylphosphorylethanolamine	HMDB0000114	22833510	C01233	C(CO)N(CC(CO)O)P(=O)(O)O
C00921	7,8-Dihydropteroic acid	HMDB0001412	170	C00921	C1C(=NC2=C(N1)NC(=NC2=O)N)CNC3=CC=C(C=C3)C(=O)O		C11831	Divinylprotochlorophyllide	METPA1061	NA	C11831	NA
C00322	Oxoadipic acid	HMDB0000225	71	C00322	C(CC(=O)C(=O)O)CC(=O)O		C00059	Sulfate	HMDB0001448	1117	C00059	[O-]S(=O)(=O)[O-]
C00811	4-Hydroxycinnamic acid	HMDB0002035	637542	C00811	C1=CC(=CC=C1/C=C/C(=O)O)O		C02666	Coniferyl aldehyde	METPA0314	NA	C02666	NA
C00166	Phenylpyruvic acid	HMDB0000205	997	C00166	C1=CC=C(C=C1)CC(=O)C(=O)O		C12205	5-Hydroxyconiferyl alcohol	HMDB0060398	5282095	C12205	COC1=CC(\C=C\CO)=CC(O)=C1O
C10945	Caffeic aldehyde	METPA1697	NA	C10945	NA		C00903	Cinnamaldehyde	HMDB0003441	637511	C00903	C1=CC=C(C=C1)/C=C/C=O
C05608	(E)-3-(4-Hydroxyphenyl)-2-propenal	HMDB0040986	641301	C05608	OC1=CC=C(\C=C\C=O)C=C1		C01477	Apigenin	HMDB0002124	5280443	C01477	C1=CC(=CC=C1C2=CC(=O)C3=C(C=C(C=C3O2)O)O)O
C05838	Coumaric acid	HMDB0041592	5280841	C05838	OC(=O)\C=C/C1=CC=CC=C1O		C10044	Norizalpinin	HMDB0029521	5281616	C10044	C1=CC=C(C=C1)C2=C(C(=O)C3=C(C=C(C=C3O2)O)O)O
C02273	Digalacturonic acid	HMDB0039721	6857565	C02273	OC1OC(C(OC2OC(C(O)C(O)C2O)C(O)=O)C(O)C1O)C(O)=O		C05906	Leucocyanidin	METPA1714	NA	C05906	NA
C04332	6,7-Dimethyl-8-(1-D-ribityl)lumazine	HMDB0003826	672	C04332	CC1=C(N(C2=NC(=O)NC(=O)C2=N1)CC(C(C(CO)O)O)O)C		C03648	cis-3 and trans-2-Hexenyl propionate	HMDB0032322	440073	C03648	C1=CC(=CC=C1[C@@H]2[C@H]([C@H](C3=C(C=C(C=C3O2)O)O)O)O)O
C03089	5-Methylthioribose	HMDB0001087	439904	C03089	CSC[C@@H]1[C@H]([C@H]([C@@H](O1)O)O)O		C12136	(-)-Epigallocatechin	HMDB0038361	72277	C12136	O[C@@H]1CC2=C(O)C=C(O)C=C2O[C@@H]1C1=CC(O)=C(O)C(O)=C1
C04713	N6-(delta2-Isopentenyl)-adenosine 5'-monophosphate	METPA1686	NA	C04713	NA		C09727	Epicatechin	HMDB0001871	72276	C09727	C1[C@H]([C@H](OC2=CC(=CC(=C21)O)O)C3=CC(=C(C=C3)O)O)O
C06032	D-erythro-3-Methylmalate	METPA0739	NA	C06032	NA		C12127	(+)-Gallocatechin	HMDB0038365	65084	C12127	O[C@H]1CC2=C(O)C=C(O)C=C2O[C@@H]1C1=CC(O)=C(O)C(O)=C1
C02630	2-Hydroxyglutarate	HMDB0059655	43	C02630	OC(CCC(O)=O)C(O)=O		C06562	Catechin	HMDB0002780	9064	C06562	C1[C@@H]([C@H](OC2=CC(=CC(=C21)O)O)C3=CC(=C(C=C3)O)O)O
C02166	Leukotriene C4	HMDB0001198	5283134	C02166	CCCCC/C=C\C/C=C\C=C\C=C\[C@H]([C@H](CCCC(=O)O)O)SC[C@@H](C(=O)NCC(=O)O)NC(=O)CC[C@@H](C(=O)O)N		C04332	6,7-Dimethyl-8-(1-D-ribityl)lumazine	HMDB0003826	672	C04332	CC1=C(N(C2=NC(=O)NC(=O)C2=N1)CC(C(C(CO)O)O)O)C
C19757	cis-3-Hexenyl acetate	HMDB0040215	5363388	C19757	CC\C=C/CCOC(C)=O		C01103	Orotidylic acid	HMDB0000218	160617	C01103	C1=C(N(C(=O)NC1=O)[C@H]2[C@@H]([C@@H]([C@H](O2)COP(=O)(O)O)O)O)C(=O)O
C00606	3-Sulfinoalanine	HMDB0000996	439270	C00606	C([C@@H](C(=O)O)N)S(=O)=O		C06032	D-erythro-3-Methylmalate	METPA0739	NA	C06032	NA
C01419	Cysteinylglycine	HMDB0000078	439498	C01419	C([C@@H](C(=O)NCC(=O)O)N)S		C06006	(S)-2-Aceto-2-hydroxybutanoic acid	HMDB0006900	440875	C06006	CC[C@](C(=O)C)(C(=O)O)O
C03719	Phenylacetothiohydroximate	METPA1761	NA	C03719	NA		C02630	2-Hydroxyglutarate	HMDB0059655	43	C02630	OC(CCC(O)=O)C(O)=O
C06118	4-(4-Deoxy-alpha-D-gluc-4-enuronosyl)-D-galacturonate	METPA0762	NA	C06118	NA		C15556	3,4-Dihydroxy-2-butanone 4-phosphate	METPA1189	NA	C15556	NA
C00364	5-Thymidylic acid	HMDB0001227	9700	C00364	CC1=CN(C(=O)NC1=O)[C@H]2C[C@@H]([C@H](O2)COP(=O)(O)O)O		C03428	Presqualene diphosphate	HMDB0001278	5280592	C03428	CC(=CCC/C(=C/CC/C(=C/[C@H]1[C@@H]([C@@]1(C)CC/C=C(\C)/CCC=C(C)C)COP(=O)(O)OP(=O)(O)O)/C)/C)C
C00062	L-Arginine	HMDB0000517	6322	C00062	C(C[C@@H](C(=O)O)N)CN=C(N)N		C01024	Hydroxymethylbilane	HMDB0001137	788	C01024	C1=C(C(=C(N1)CC2=C(C(=C(N2)CC3=C(C(=C(N3)CC4=C(C(=C(N4)CO)CC(=O)O)CCC(=O)O)CC(=O)O)CCC(=O)O)CC(=O)O)CCC(=O)O)CC(=O)O)CCC(=O)O
C05933	N-(o)-Hydroxyarginine	HMDB0004224	440849	C05933	C(CC(C(=O)O)N)CN=C(N)NO		C01302	1-(2-Carboxyphenylamino)-1-deoxy-D-ribulose 5-phosphate	METPA0170	NA	C01302	NA
C18326	p-Coumaroylputrescine	NA	103061507	C18326	NA		C04302	N-(5-Phospho-D-ribosyl)anthranilate	METPA0483	NA	C04302	NA
C04732	5-Amino-6-ribitylamino uracil	HMDB0011106	221	C04732	C(C(C(C(CO)O)O)O)NC1=C(C(=O)NC(=O)N1)N		C08580	Astaxanthin	HMDB0002204	5281224	C08580	CC1=C(C(C[C@@H](C1=O)O)(C)C)/C=C/C(=C/C=C/C(=C/C=C/C=C(/C=C/C=C(/C=C/C2=C(C(=O)[C@H](CC2(C)C)O)C)\C)\C)/C)/C
C13455	Abscisic aldehyde	METPA1110	NA	C13455	NA		C05382	D-Sedoheptulose 7-phosphate	HMDB0001068	22833559	C05382	C([C@@H]1[C@H]([C@H]([C@@H](C(O1)(CO)O)O)O)O)OP(=O)(O)O
C00251	Chorismate	HMDB0012199	12039	C00251	C=C(C(=O)O)O[C@@H]1C=C(C=C[C@H]1O)C(=O)O		C00188	L-Threonine	HMDB0000167	6288	C00188	C[C@H]([C@@H](C(=O)O)N)O
C00254	Prephenate	HMDB0012283	1028	C00254	C1=CC(C=CC1O)(CC(=O)C(=O)O)C(=O)O		C00263	L-Homoserine	HMDB0000719	12647	C00263	C(CO)[C@@H](C(=O)O)N
C01181	4-Trimethylammoniobutanoic acid	HMDB0001161	134	C01181	C[N+](C)(C)CCCC(=O)O		C05519	L-Allothreonine	HMDB0004041	99289	C05519	C[C@@H]([C@@H](C(=O)O)N)O
C00482	Sinapic acid	HMDB0032616	637775	C00482	COC1=CC(=CC(=C1O)OC)/C=C/C(=O)O		C00561	Mandelonitrile	HMDB0060486	9548674	C00561	O[C@@H](C#N)C1=CC=CC=C1
C17224	2-Oxo-8-methylthiooctanoic acid	METPA1750	NA	C17224	NA		C01179	4-Hydroxyphenylpyruvic acid	HMDB0000707	979	C01179	C1=CC(=CC=C1CC(=O)C(=O)O)O
C16517	Indolylmethyl-desulfoglucosinolate	METPA1310	NA	C16517	NA		C05350	2-Hydroxy-3-(4-hydroxyphenyl)propenoic acid	HMDB0006915	636708	C05350	C1=CC(=CC=C1/C=C(/C(=O)O)\O)O
C03648	cis-3 and trans-2-Hexenyl propionate	HMDB0032322	440073	C03648	C1=CC(=CC=C1[C@@H]2[C@H]([C@H](C3=C(C=C(C=C3O2)O)O)O)O)O		C01197	Caffeate	NA	4422	C01197	NA
C09727	Epicatechin	HMDB0001871	72276	C09727	C1[C@H]([C@H](OC2=CC(=CC(=C21)O)O)C3=CC(=C(C=C3)O)O)O		C01672	Cadaverine	HMDB0002322	273	C01672	C(CCN)CCN
C09736	Fisetinidol-4beta-ol	NA	11924	C09736	NA		C02723	N-Methylputrescine	HMDB0003661	439791	C02723	CNCCCCN
C05907	Luteoforol	HMDB0041310	440834	C05907	OC1CC(OC2=CC(O)=CC(O)=C12)C1=CC(O)=C(O)C=C1		C00032	Heme	HMDB0003178	26945	C00032	CC1=C(CCC(O)=O)C2=CC3=[N+]4C(=CC5=C(C=C)C(C)=C6C=C7C(C=C)=C(C)C8=[N+]7[Fe@]4(N2C1=C8)N56)C(C)=C3CCC(O)=O
C00935	UDP-L-arabinose	HMDB0012303	644105	C00935	C1[C@@H]([C@@H]([C@H]([C@H](O1)OP(=O)(O)OP(=O)(O)OC[C@@H]2[C@H]([C@H]([C@@H](O2)N3C=CC(=O)NC3=O)O)O)O)O)O		C00811	4-Hydroxycinnamic acid	HMDB0002035	637542	C00811	C1=CC(=CC=C1/C=C/C(=O)O)O
C00190	Cotinine glucuronide	HMDB0001013	3398121	C00190	CN1C(CCC1=O)C2=C[N+](=CC=C2)C3C(C(C(C(O3)C(=O)[O-])O)O)O		C00166	Phenylpyruvic acid	HMDB0000205	997	C00166	C1=CC=C(C=C1)CC(=O)C(=O)O
C01623	UDP-D-apiose	HMDB0012301	25202307	C01623	C1[C@@]([C@H]([C@@H](O1)OP(=O)(O)OP(=O)(O)OC[C@@H]2[C@H]([C@H]([C@@H](O2)N3C=CC(=O)NC3=O)O)O)O)(CO)O		C02763	Enol-phenylpyruvate	HMDB0012225	641637	C02763	C1=CC=C(C=C1)/C=C(/C(=O)O)\O
C18094	UDP-L-arabinofuranose	NA	96024311	C18094	NA		C05608	(E)-3-(4-Hydroxyphenyl)-2-propenal	HMDB0040986	641301	C05608	OC1=CC=C(\C=C\C=O)C=C1
C00042	Succinic acid	HMDB0000254	1110	C00042	C(CC(=O)O)C(=O)O		C10945	Caffeic aldehyde	METPA1697	NA	C10945	NA
C02170	Methylmalonic acid	HMDB0000202	487	C02170	CC(C(=O)O)C(=O)O		C05838	Coumaric acid	HMDB0041592	5280841	C05838	OC(=O)\C=C/C1=CC=CC=C1O
C17249	7-Methylthioheptanaldoxime	METPA1775	NA	C17249	NA		C05332	Phenylethylamine	HMDB0012275	1001	C05332	C1=CC=C(C=C1)CCN
C04494	Guanosine 3'-diphosphate 5'-triphosphate	HMDB0060480	38166	C04494	[H][C@]1(COP(O)(=O)OP(O)(=O)OP(O)(O)=O)O[C@@]([H])(N2C=NC3=C2NC(=N)N=C3O)[C@]([H])(O)[C@]1([H])OP(O)(=O)OP(O)(O)=O		C02166	Leukotriene C4	HMDB0001198	5283134	C02166	CCCCC/C=C\C/C=C\C=C\C=C\[C@H]([C@H](CCCC(=O)O)O)SC[C@@H](C(=O)NCC(=O)O)NC(=O)CC[C@@H](C(=O)O)N
C00233	Ketoleucine	HMDB0000695	70	C00233	CC(C)CC(=O)C(=O)O		C03451	S-Lactoylglutathione	HMDB0001066	440018	C03451	C[C@H](C(=O)SC[C@@H](C(=O)NCC(=O)O)NC(=O)CC[C@@H](C(=O)O)N)O
C01268	5-Amino-6-(5'-phosphoribosylamino)uracil	METPA0159	NA	C01268	NA		C05379	Oxalosuccinic acid	HMDB0003974	972	C05379	C(C(C(=O)C(=O)O)C(=O)O)C(=O)O
C15670	Chenodeoxyglycocholoyl-CoA	HMDB0006897	440685	C15670	CC(CCC(=O)SCCNC(=O)CCNC(=O)C(C(C)(C)COP(=O)(O)OP(=O)(O)OC[C@@H]1[C@H]([C@H]([C@@H](O1)N2C=NC3=C2N=CN=C3N)O)OP(=O)(O)O)O)C4CCC5[C@@]4(CCC6C5[C@@H](C[C@H]7[C@@]6(CC[C@H](C7)O)C)O)C		C01236	6-Phosphonoglucono-D-lactone	HMDB0001127	439452	C01236	C([C@@H]1[C@H]([C@@H]([C@H](C(=O)O1)O)O)O)OP(=O)(O)O
C01613	Stachyose	HMDB0003553	439531	C01613	C([C@@H]1[C@@H]([C@@H]([C@H]([C@H](O1)OC[C@@H]2[C@@H]([C@@H]([C@H]([C@H](O2)OC[C@@H]3[C@H]([C@@H]([C@H]([C@H](O3)O[C@]4([C@H]([C@@H]([C@H](O4)CO)O)O)CO)O)O)O)O)O)O)O)O)O)O		C01268	5-Amino-6-(5'-phosphoribosylamino)uracil	METPA0159	NA	C01268	NA
C17210	2-(2'-Methylthio)ethylmalic acid	METPA1766	NA	C17210	NA		C01036	Maleylacetoacetic acid	HMDB0002052	5280398	C01036	C(C(=O)CC(=O)O)C(=O)/C=C\C(=O)O
C17212	3-(2'-Methylthio)ethylmalic acid	NA	96023620	C17212	NA		C00822	Dopaquinone	HMDB0001229	439316	C00822	C1=CC(=O)C(=O)C=C1C[C@@H](C(=O)O)N
C17216	2-Oxo-6-methylthiohexanoic acid	METPA1748	NA	C17216	NA		C05903	Kaempferol	HMDB0005801	5280863	C05903	C1=CC(=CC=C1C2=C(C(=O)C3=C(C=C(C=C3O2)O)O)O)O
C00561	Mandelonitrile	HMDB0060486	9548674	C00561	O[C@@H](C#N)C1=CC=CC=C1		C01514	Luteolin	HMDB0005800	5280445	C01514	C1=CC(=C(C=C1C2=CC(=O)C3=C(C=C(C=C3O2)O)O)O)O
C00637	Indoleacetaldehyde	HMDB0001190	800	C00637	C1=CC=C2C(=C1)C(=CN2)CC=O		C01674	Chitobiose	HMDB0003556	22833609	C01674	CC(=O)N[C@@H]1[C@H]([C@@H]([C@H](O[C@H]1O)CO)O[C@H]2[C@@H]([C@H]([C@@H]([C@H](O2)CO)O)O)NC(=O)O)O
C05844	5-L-Glutamyl-taurine	HMDB0004195	68759	C05844	C(CC(=O)NCCS(=O)(=O)O)[C@@H](C(=O)O)N		C00065	L-Serine	HMDB0000187	5951	C00065	C([C@@H](C(=O)O)N)O
C17233	Hexahomomethionine	METPA1758	NA	C17233	NA		C00740	D-Serine	HMDB0003406	71077	C00740	C([C@H](C(=O)O)N)O
C00355	L-Dopa	HMDB0000181	6047	C00355	C1=CC(=C(C=C1C[C@@H](C(=O)O)N)O)O		C00279	D-Erythrose 4-phosphate	HMDB0001321	122357	C00279	C([C@H]([C@H](C=O)O)O)OP(=O)(O)O
C19715	N,N-Dihydroxy-L-phenylalanine	NA	135626183	C19715	NA		C00242	Guanine	HMDB0000132	764	C00242	C1=NC2=C(N1)C(=O)N=C(N2)N
C00379	D-Xylitol	HMDB0002917	6912	C00379	C([C@H](C([C@H](CO)O)O)O)O		C00147	Adenine	HMDB0000034	190	C00147	C1=NC2=C(N1)C(=NC=N2)N
C00794	Sorbitol	HMDB0000247	5780	C00794	C([C@H]([C@H]([C@@H]([C@H](CO)O)O)O)O)O		C00470	Pectic acid	HMDB0003363	445929	C00470	[C@@H]1([C@H]([C@H](O[C@@H]([C@@H]1O)O)C(=O)O)O)O
C00398	Tryptamine	HMDB0000303	1150	C00398	C1=CC=C2C(=C1)C(=CN2)CCN		C00191	D-Glucuronic acid	HMDB0000127	94715	C00191	[C@@H]1([C@@H]([C@H](O[C@@H]([C@@H]1O)O)C(=O)O)O)O
C04079	D-Pantothenoyl-L-cysteine	HMDB0006834	440217	C04079	CC(C)(CO)[C@H](C(=O)NCCC(=O)N[C@@H](CS)C(=O)O)O		C03089	5-Methylthioribose	HMDB0001087	439904	C03089	CSC[C@@H]1[C@H]([C@H]([C@@H](O1)O)O)O
C00120	Biotin	HMDB0000030	171548	C00120	C1[C@H]2[C@@H]([C@@H](S1)CCCCC(=O)O)NC(=O)N2		C00333	D-Galacturonate	NA	3627	C00333	NA
C03406	Argininosuccinic acid	HMDB0000052	16950	C03406	C(C[C@@H](C(=O)O)N)CN=C(N)N[C@@H](CC(=O)O)C(=O)O		C00606	3-Sulfinoalanine	HMDB0000996	439270	C00606	C([C@@H](C(=O)O)N)S(=O)=O
C00135	L-Histidine	HMDB0000177	6274	C00135	C1=C(NC=N1)C[C@@H](C(=O)O)N		C01419	Cysteinylglycine	HMDB0000078	439498	C01419	C([C@@H](C(=O)NCC(=O)O)N)S
C05921	Biotinyl-5'-AMP	HMDB0004220	440839	C05921	C1C2C([C@@H](S1)CCCCC(=O)OP(=O)(O)OC[C@@H]3[C@H]([C@H]([C@@H](O3)N4C=NC5=C4N=CN=C5N)O)O)NC(=O)N2		C00221	D-Glucose	HMDB0000122	5793	C00221	C([C@@H]1[C@H]([C@@H]([C@H](C(O1)O)O)O)O)O
C09332	Tetrahydrofolyl-[Glu](2)	HMDB0006825	442163	C09332	C1C(NC2=C(N1)NC(=NC2=O)N)CNC3=CC=C(C=C3)C(=O)NC(CCC(=O)NC(CCC(=O)O)C(=O)O)C(=O)O		C00267	Alpha-D-Glucose	HMDB0003345	79025	C00267	C([C@@H]1[C@H]([C@@H]([C@H]([C@H](O1)O)O)O)O)O
C01267	Imidazole acetol-phosphate	HMDB0012236	792	C01267	C1=C(NC=N1)CC(=O)COP(=O)(O)O		C01801	Deoxyribose	HMDB0003224	22833604	C01801	C1[C@H]([C@@H](O[C@@H]1O)CO)O
C03838	Glycineamideribotide	HMDB0002022	5459918	C03838	C([C@@H]1[C@H]([C@H]([C@@H](O1)NC(=O)CN)O)O)OP(=O)(O)O		C00159	D-Mannose	HMDB0000169	18950	C00159	C([C@@H]1[C@H]([C@@H]([C@@H](C(O1)O)O)O)O)O
C00144	Guanosine monophosphate	HMDB0001397	6804	C00144	C1=NC2=C(N1[C@H]3[C@@H]([C@@H]([C@H](O3)COP(=O)(O)O)O)O)NC(=NC2=O)N		C00095	D-Fructose	NA	3395	C00095	NA
C18239	Cyclic pyranopterin monophosphate	HMDB0059639	16061579	C18239	[H][C@@]12COP(O)(=O)O[C@]1([H])C(O)(O)[C@]1([H])NC3=C(NC(=N)N=C3O)N[C@]1([H])O2		C01019	L-Fucose	HMDB0000174	25310	C01019	C[C@H]1[C@H]([C@H]([C@@H](C(O1)O)O)O)O
C00944	3-Dehydroquinate	HMDB0012710	439351	C00944	C1[C@H]([C@@H](C(=O)C[C@]1(C(=O)O)O)O)O		C00124	D-Galactose	NA	3424	C00124	NA
C03758	Dopamine	HMDB0000073	681	C03758	C1=CC(=C(C=C1CCN)O)O		C00031	D-Glucose	HMDB0000122	5793	C00031	C([C@@H]1[C@H]([C@@H]([C@H](C(O1)O)O)O)O)O
C00072	Ascorbate	NA	3372	C00072	NA		C00137	myo-Inositol	HMDB0000211	NA	C00137	O[C@H]1[C@H](O)[C@@H](O)[C@H](O)[C@H](O)[C@@H]1O
C00590	Coniferyl alcohol	HMDB0012915	1549095	C00590	COC1=C(C=CC(=C1)/C=C/CO)O		C00984	D-Galactose	HMDB0000143	439357	C00984	C([C@@H]1[C@@H]([C@@H]([C@H]([C@H](O1)O)O)O)O)O
C19691	Farnesylcysteine	HMDB0011627	6438372	C19691	CC(=CCC/C(=C/CC/C(=C/CSC[C@@H](C(=O)O)N)/C)/C)C		C01825	L-Galactose	HMDB0033704	6036	C01825	C([C@H]1[C@H]([C@H]([C@@H](C(O1)O)O)O)O)O
C05512	Deoxyinosine	HMDB0000071	65058	C05512	C1[C@@H]([C@H](O[C@H]1N2C=NC3=C2NC=NC3=O)CO)O		C04272	(R)-2,3-Dihydroxy-isovalerate	HMDB0012141	440279	C04272	CC(C)([C@H](C(=O)O)O)O
C00978	N-Acetylserotonin	HMDB0001238	903	C00978	CC(=O)NCCC1=CNC2=C1C=C(C=C2)O		C02336	D-Fructose	HMDB0000660	439709	C02336	C([C@@H]1[C@H]([C@@H]([C@](O1)(CO)O)O)O)O
C01494	trans-Ferulic acid	HMDB0000954	445858	C01494	COC1=C(C=CC(=C1)/C=C/C(=O)O)O		C20345	Isopentenyl phosphate	NA	163312083	C20345	NA
C12204	5-Hydroxyconiferaldehyde	METPA1090	NA	C12204	NA		C11811	1-Hydroxy-2-methyl-2-butenyl 4-diphosphate	METPA1056	NA	C11811	NA
C00461	Chitin	HMDB0003362	21252321	C00461	CC(=O)NC1[C@@H](OC([C@H]([C@@H]1O)COC[C@H]2C([C@H]([C@@H](C(O2)CO)O)O)NC(=O)C)CO)COC[C@H]3[C@@H](C([C@@H](OC3CO)O)NC(=O)C)O		C05909	Leucodelphinidin	METPA1713	NA	C05909	NA
C00385	Xanthine	HMDB0000292	1188	C00385	C1=NC2=C(N1)C(=O)NC(=O)N2		C00386	Carnosine	HMDB0000033	439224	C00386	C1=C(NC=N1)C[C@@H](C(=O)O)NC(=O)CCN
C17245	5-Methylthiopentanaldoxime	METPA1772	NA	C17245	NA		C01262	Anserine	HMDB0000194	112072	C01262	CN1C=NC=C1C[C@@H](C(=O)O)NC(=O)CCN
C02637	3-Dehydroshikimate	METPA0312	NA	C02637	NA		C00299	Uridine	HMDB0000296	6029	C00299	C1=CN(C(=O)NC1=O)[C@H]2[C@@H]([C@@H]([C@H](O2)CO)O)O
C00329	Glucosamine	HMDB0001514	439213	C00329	C([C@@H]1[C@H]([C@@H]([C@H](C(O1)O)N)O)O)O		C02350	(S)(+)-Allantoin	METPA0276	NA	C02350	NA
C01246	Dolichyl b-D-glucosyl phosphate	HMDB0001054	22833557	C01246	CC(CC/C=C(/C)\CCC=C(C)C)CCOP(=O)(O)O[C@H]1[C@@H]([C@H]([C@@H]([C@H](O1)CO)O)O)O		C00233	Ketoleucine	HMDB0000695	70	C00233	CC(C)CC(=O)C(=O)O
C00101	Tetrahydrofolic acid	HMDB0001846	5280320	C00101	C1C(NC2=C(N1)NC(=NC2=O)N)CNC3=CC=C(C=C3)C(=O)N[C@@H](CCC(=O)O)C(=O)O		C06010	(S)-2-Acetolactate	HMDB0006855	440878	C06010	CC(=O)[C@@](C)(C(=O)O)O
C05906	Leucocyanidin	METPA1714	NA	C05906	NA		C00164	Acetoacetic acid	HMDB0000060	96	C00164	CC(=O)CC(=O)O
C12136	(-)-Epigallocatechin	HMDB0038361	72277	C12136	O[C@@H]1CC2=C(O)C=C(O)C=C2O[C@@H]1C1=CC(O)=C(O)C(O)=C1		C00232	Succinic acid semialdehyde	HMDB0001259	1112	C00232	C(CC(=O)O)C=O
C18069	N1,N5,N10-Tricoumaroyl spermidine	METPA1698	NA	C18069	NA		C00109	2-Ketobutyric acid	HMDB0000005	58	C00109	CCC(=O)C(=O)O
C11832	Divinyl chlorophyllide a	METPA1062	NA	C11832	NA		C06002	(S)-Methylmalonic acid semialdehyde	HMDB0002217	5462303	C06002	C[C@@H](C=O)C(=O)O
C11830	13(1)-Oxo-magnesium-protoporphyrin IX 13-monomethyl ester	METPA1060	NA	C11830	NA		C00349	2-Methyl-3-oxopropanoic acid	HMDB0001172	296	C00349	CC(C=O)C(=O)O
C02880	Protochlorophyllide	HMDB0031148	NA	C02880	[Mg++].[H]\C-1=C2\[N-]\C(=C([H])/C3=N/C(/C(CCC([O-])=O)=C3C)=C3\C(C(=O)OC)C(=O)C4=C(C)\C(\N=C34)=C([H])\C3=C(C=C)C(C)=C-1N3)C(C)=C2C=C		C00450	(S)-2,3,4,5-Tetrahydropiperidine-2-carboxylate	HMDB0012130	165067	C00450	C1CC=NC(C1)C(=O)O
C00341	Geranyl 2-methylbutyrate	HMDB0032291	6437648	C00341	CCC(C)C(=O)OC/C=C(\C)/CCC=C(C)C		C00794	Sorbitol	HMDB0000247	5780	C00794	C([C@H]([C@H]([C@@H]([C@H](CO)O)O)O)O)O
C03492	D-4'-Phosphopantothenate	HMDB0001016	131	C03492	CC(C)(COP(=O)(O)O)C(C(=O)NCCC(=O)O)O		C16362	3,6,8-Trimethylallantoin	METPA1295	NA	C16362	NA
C01100	L-Histidinol phosphate	METPA0128	NA	C01100	NA		C19872	N-Formyl-4-amino-5-aminomethyl-2-methylpyrimidine	NA	135626338	C19872	NA
C01185	Nicotinic acid mononucleotide	HMDB0001132	53477721	C01185	C1C(C=CC=[N+]1[C@H]2[C@@H]([C@@H]([C@H](O2)COP(=O)(O)[O-])O)O)C(=O)O		C00643	5-Hydroxy-L-tryptophan	HMDB0000472	144	C00643	C1=CC2=C(C=C1O)C(=CN2)CC(C(=O)O)N
C16405	Homoeriodictyol chalcone	METPA1731	NA	C16405	NA		C05911	Pentahydroxyflavanone	METPA1717	NA	C05911	NA
C03541	Tetrahydrofolyl-[Glu](n)	HMDB0006826	45479706	C03541	C1C(NC2=C(N1)NC(=NC2=O)N)CNC3=CC=C(C=C3)C(=O)NC(CCC(=O)NC(CCC(=O)NC(CCC(=O)O)C(=O)O)C(=O)O)C(=O)O		C01617	Taxifolin	METPA0191	NA	C01617	NA
C01120	Sphinganine 1-phosphate	HMDB0001383	644260	C01120	CCCCCCCCCCCCCCC[C@H]([C@H](COP(=O)(O)O)N)O		C05921	Biotinyl-5'-AMP	HMDB0004220	440839	C05921	C1C2C([C@@H](S1)CCCCC(=O)OP(=O)(O)OC[C@@H]3[C@H]([C@H]([C@@H](O3)N4C=NC5=C4N=CN=C5N)O)O)NC(=O)N2
C00178	Thymine	HMDB0000262	1135	C00178	CC1=CNC(=O)NC1=O		C00082	L-Tyrosine	HMDB0000158	6057	C00082	C1=CC(=CC=C1C[C@@H](C(=O)O)N)O
C02835	Imidazoleacetic acid	HMDB0002024	96215	C02835	C1=C(NC=N1)CC(=O)O		C06118	4-(4-Deoxy-alpha-D-gluc-4-enuronosyl)-D-galacturonate	METPA0762	NA	C06118	NA
C16540	7(1)-Hydroxychlorophyllide a	NA	51090869	C16540	NA		C11355	4-Amino-4-deoxychorismate	METPA0993	NA	C11355	NA
C18156	Bacteriochlorophyllide b	MA3TEM077	96024373	C18156	CC1=C(C2=C(CCN[C@H]2C3=CNC(=O)C(=C3)Cl)C=C1)C		C03794	Adenylsuccinic acid	HMDB0000536	440122	C03794	C1=NC2=C(C(=N1)NC(CC(=O)O)C(=O)O)N=CN2[C@H]3[C@@H]([C@@H]([C@H](O3)COP(=O)(O)O)O)O
C00624	N-Acetylglutamic acid	HMDB0001138	185	C00624	CC(=O)NC(CCC(=O)O)C(=O)O		C11453	2-C-Methyl-D-erythritol 2,4-cyclodiphosphate	METPA1030	NA	C11453	NA
C05634	5-Hydroxyindoleacetaldehyde	HMDB0004073	74688	C05634	C1=CC2=C(C=C1O)C(=CN2)CC=O		C01100	L-Histidinol phosphate	METPA0128	NA	C01100	NA
C00954	Indoleacetic acid	HMDB0000197	802	C00954	C1=CC=C2C(=C1)C(=CN2)CC(=O)O		C20784	ADP-5-ethyl-4-methylthiazole-2-carboxylate	NA	254741251	C20784	NA
C05635	5-Hydroxyindoleacetic acid	HMDB0000763	1826	C05635	C1=CC2=C(C=C1O)C(=CN2)CC(=O)O		C06429	Docosahexaenoic acid	HMDB0002183	445580	C06429	CC/C=C\C/C=C\C/C=C\C/C=C\C/C=C\C/C=C\CCC(=O)O
C02985	Fucose 1-phosphate	HMDB0001265	439871	C02985	C[C@H]1[C@H]([C@H]([C@@H](C(O1)OP(=O)(O)O)O)O)O		C01571	Capric acid	HMDB0000511	2969	C01571	CCCCCCCCCC(=O)O
C05619	3-(3,4-Dihydroxy-5-methoxy)-2-propenoic acid	HMDB0035484	446834	C05619	COC1=CC(=CC(=C1O)O)/C=C/C(=O)O		C03078	4-Guanidinobutanamide	METPA0359	NA	C03078	NA
C06055	O-Phospho-4-hydroxy-L-threonine	HMDB0006802	440901	C06055	C([C@H]([C@@H](C(=O)O)N)O)OP(=O)(O)O		C03765	4-Hydroxyphenylacetaldehyde	HMDB0003767	440113	C03765	C1=CC(=CC=C1CC=O)O
C05640	Cinnavalininate	HMDB0004078	114918	C05640	C1=CC(=C2C(=C1)OC3=CC(=O)C(=C(C3=N2)C(=O)O)N)C(=O)O		C07086	Phenylacetic acid	HMDB0000209	999	C07086	C1=CC=C(C=C1)CC(=O)O
C17230	2-(7'-Methylthio)heptylmalic acid	METPA1771	NA	C17230	NA		C12206	Caffeyl alcohol	METPA1708	NA	C12206	NA
C17231	3-(7'-Methylthio)heptylmalic acid	NA	96023639	C17231	NA		C04742	15(S)-HETE	HMDB0003876	9966861	C04742	CCCCC[C@@H](/C=C/C=C\C/C=C\C/C=C\CCCC(=O)O)O
G00145	(GlcN)1 (Ino(acyl)-P)1	METPA1583	NA	G00145	NA		C04805	5-HETE	HMDB0011134	5280733	C04805	CCCCC/C=C\C/C=C\C/C=C\C=C\[C@H](CCCC(=O)O)O
C05859	Dehydrodolichol diphosphate	NA	8152	C05859	NA		C05778	Sirohydrochlorin	METPA0681	NA	C05778	NA
C20784	ADP-5-ethyl-4-methylthiazole-2-carboxylate	NA	254741251	C20784	NA		C06459	Phosphorylcholine	HMDB0001565	8691	C06459	C[N+](C)(C)CCOP(O)(O)=O
C11831	Divinylprotochlorophyllide	METPA1061	NA	C11831	NA		C10287	4-[(E)-2-(3,5-dimethoxyphenyl)ethenyl]phenol	HMDB0130987	5281727	C10287	[H]\C(=C(\[H])C1=CC(OC)=CC(OC)=C1)C1=CC=C(O)C=C1
C18098	Primary fluorescent chlorophyll catabolite	METPA1637	NA	C18098	NA		C05610	Sinapoyl aldehyde	METPA0625	NA	C05610	NA
C00671	3-Methyl-2-oxovaleric acid	HMDB0000491	47	C00671	CCC(C)C(=O)C(=O)O		C01494	trans-Ferulic acid	HMDB0000954	445858	C01494	COC1=C(C=CC(=C1)/C=C/C(=O)O)O
C00621	Dolichyl diphosphate	HMDB0001513	5462166	C00621	CC/C(=C/CCCC(C)CCOP(=O)(O)OP(=O)(O)O)/C		C12204	5-Hydroxyconiferaldehyde	METPA1090	NA	C12204	NA
C01041	Ascorbic acid	HMDB0000044	54670067	C01041	C([C@@H]([C@@H]1C(=C(C(=O)O1)O)O)O)O		C00440	5-Methyltetrahydrofolic acid	HMDB0001396	439234	C00440	CN1C(CNC2=C1C(=O)N=C(N2)N)CNC3=CC=C(C=C3)C(=O)N[C@H](CCC(=O)O)C(=O)O
C02670	D-Glucurono-6,3-lactone	HMDB0006355	439782	C02670	[C@H]1([C@@H]2[C@@H]([C@H](C(=O)O2)O)O[C@H]1O)O		C00621	Dolichyl diphosphate	HMDB0001513	5462166	C00621	CC/C(=C/CCCC(C)CCOP(=O)(O)OP(=O)(O)O)/C
C03289	L-xylo-Hexulonolactone	METPA0381	NA	C03289	NA		C09833	Sakuranetin	HMDB0030090	73571	C09833	COC1=CC(=C2C(=O)C[C@H](OC2=C1)C3=CC=C(C=C3)O)O
C05946	D-4-Hydroxy-2-oxoglutarate	HMDB0060466	440853	C05946	[H][C@@](O)(CC(=O)C(O)=O)C(O)=O		C02191	Protoporphyrin IX	HMDB0000241	NA	C02191	CC1=C(CCC(O)=O)/C2=C/C3=N/C(=C\C4=C(C)C(C=C)=C(N4)/C=C4\N=C(\C=C\1/N\2)C(C=C)=C4C)/C(C)=C3CCC(O)=O
C01134	Pantetheine 4'-phosphate	HMDB0001416	987	C01134	CC(C)(COP(=O)(O)O)C(C(=O)NCCC(=O)NCCS)O		C00944	3-Dehydroquinate	HMDB0012710	439351	C00944	C1[C@H]([C@@H](C(=O)C[C@]1(C(=O)O)O)O)O
C08604	Cyanidin 3-glucoside	HMDB0030684	4481259	C08604	C1=CC(=C(C=C1C2=C(C=C3C(=CC(=CC3=[O+]2)O)O)OC4C(C(C(C(O4)CO)O)O)O)O)O		C03758	Dopamine	HMDB0000073	681	C03758	C1=CC(=C(C=C1CCN)O)O
C05576	3,4-Dihydroxyphenylglycol	HMDB0000318	91528	C05576	C1=CC(=C(C=C1C(CO)O)O)O		C05404	D-Gal alpha 1->6D-Gal alpha 1->6D-Glucose	HMDB0060468	440660	C05404	OC[C@H]1O[C@H](OC[C@H]2O[C@H](OC[C@H]3OC(O)[C@H](O)[C@@H](O)[C@@H]3O)[C@H](O)[C@@H](O)[C@H]2O)[C@H](O)[C@@H](O)[C@H]1O
C00096	Guanosine diphosphate mannose	HMDB0001163	18396	C00096	C1=NC2=C(N1[C@H]3[C@@H]([C@@H]([C@H](O3)COP(=O)(O)OP(=O)(O)O[C@@H]4[C@H]([C@H]([C@@H]([C@H](O4)CO)O)O)O)O)O)NC(=NC2=O)N		C00492	Raffinose	HMDB0003213	10542	C00492	C([C@@H]1[C@@H]([C@@H]([C@H](C(O1)OC[C@@H]2[C@H]([C@@H]([C@H](C(O2)O[C@]3([C@H]([C@@H]([C@H](O3)CO)O)O)CO)O)O)O)O)O)O)O
C02280	GDP-L-galactose	METPA0266	NA	C02280	NA		C00721	Dextrin	HMDB0006857	62698	C00721	C([C@@H]1[C@H]([C@@H]([C@H](C(O1)O[C@@H]2[C@H](OC([C@@H]([C@H]2O)O)O[C@@H]3[C@H](O[C@@H]([C@@H]([C@H]3O)O)O)CO)CO)O)O)O)O
C15925	GDP-L-gulose	METPA1226	NA	C15925	NA		C00482	Sinapic acid	HMDB0032616	637775	C00482	COC1=CC(=CC(=C1O)OC)/C=C/C(=O)O
C20345	Isopentenyl phosphate	NA	163312083	C20345	NA		C04640	Phosphoribosylformylglycineamidine	HMDB0000999	440417	C04640	C([C@@H]1[C@H]([C@H]([C@@H](O1)N=C(CNC=O)N)O)O)OP(=O)(O)O
C02666	Coniferyl aldehyde	METPA0314	NA	C02666	NA		C00680	meso-2,6-Diaminoheptanedioate	HMDB0001370	99290	C00680	N[C@@H](CCC[C@H](N)C(O)=O)C(O)=O
C00221	D-Glucose	HMDB0000122	5793	C00221	C([C@@H]1[C@H]([C@@H]([C@H](C(O1)O)O)O)O)O		C02463	Precorrin 2	METPA0294	NA	C02463	NA
C00267	Alpha-D-Glucose	HMDB0003345	79025	C00267	C([C@@H]1[C@H]([C@@H]([C@H]([C@H](O1)O)O)O)O)O
C01801	Deoxyribose	HMDB0003224	22833604	C01801	C1[C@H]([C@@H](O[C@@H]1O)CO)O
C00159	D-Mannose	HMDB0000169	18950	C00159	C([C@@H]1[C@H]([C@@H]([C@@H](C(O1)O)O)O)O)O
C00095	D-Fructose	NA	3395	C00095	NA
C01019	L-Fucose	HMDB0000174	25310	C01019	C[C@H]1[C@H]([C@H]([C@@H](C(O1)O)O)O)O
C00124	D-Galactose	NA	3424	C00124	NA
C00031	D-Glucose	HMDB0000122	5793	C00031	C([C@@H]1[C@H]([C@@H]([C@H](C(O1)O)O)O)O)O
C00137	myo-Inositol	HMDB0000211	NA	C00137	O[C@H]1[C@H](O)[C@@H](O)[C@H](O)[C@H](O)[C@@H]1O
C00984	D-Galactose	HMDB0000143	439357	C00984	C([C@@H]1[C@@H]([C@@H]([C@H]([C@H](O1)O)O)O)O)O
C01825	L-Galactose	HMDB0033704	6036	C01825	C([C@H]1[C@H]([C@H]([C@@H](C(O1)O)O)O)O)O
C04272	(R)-2,3-Dihydroxy-isovalerate	HMDB0012141	440279	C04272	CC(C)([C@H](C(=O)O)O)O
C02336	D-Fructose	HMDB0000660	439709	C02336	C([C@@H]1[C@H]([C@@H]([C@](O1)(CO)O)O)O)O
C11863	Gibberellin A9	METPA1064	NA	C11863	NA
C00345	6-Phosphogluconic acid	HMDB0001316	91493	C00345	C([C@H]([C@H]([C@@H]([C@H](C(=O)O)O)O)O)O)OP(=O)(O)O
C05379	Oxalosuccinic acid	HMDB0003974	972	C05379	C(C(C(=O)C(=O)O)C(=O)O)C(=O)O
C06114	gamma-Glutamyl-beta-aminopropiononitrile	HMDB0060477	440920	C06114	[H][C@](N)(CCC(O)=NCCC#N)C(O)=O
C03579	2beta-Hydroxygibberellin 1	METPA1641	NA	C03579	NA
C05841	Nicotinate D-ribonucleoside	HMDB0006809	161234	C05841	C1=CC(=C[N+](=C1)[C@H]2[C@@H]([C@@H]([C@H](O2)CO)O)O)C(=O)O
C00553	(+)-Neomenthol	HMDB0035763	439263	C00553	C[C@@H]1CC[C@H]([C@H](C1)O)C(C)C
C01417	Cyanate	HMDB0002078	105034	C01417	C(#N)[O-]
C01888	Aminoacetone	HMDB0002134	215	C01888	CC(=O)CN
C05665	3-Aminopropionaldehyde	HMDB0001106	75	C05665	C(CN)C=O
C18151	7(1)-Hydroxychlorophyll a	NA	96024368	C18151	NA
C11242	Bacterio-chlorophyll a	MA3TEM078	13420	C11242	C1CCCCCC(=O)CCCC1
C18071	N1,N5,N10-Triferuloyl spermidine	METPA1699	NA	C18071	NA
C21854	Kaempferol 3-O-rhamnoside-7-O-glucoside	NA	NA	C21854	NA
C00470	Pectic acid	HMDB0003363	445929	C00470	[C@@H]1([C@H]([C@H](O[C@@H]([C@@H]1O)O)C(=O)O)O)O
C00191	D-Glucuronic acid	HMDB0000127	94715	C00191	[C@@H]1([C@@H]([C@H](O[C@@H]([C@@H]1O)O)C(=O)O)O)O
C01118	O-Succinyl-L-homoserine	METPA0134	NA	C01118	NA
C00475	Cytidine	HMDB0000089	6253	C00475	C1=CN(C(=O)N=C1N)[C@H]2[C@@H]([C@@H]([C@H](O2)CO)O)O
C05711	gamma-Glutamyl-beta-cyanoalanine	HMDB0060478	53297342	C05711	N[C@@H](CCC(O)=N[C@@H](CC#N)C(O)=O)C(O)=O
C04640	Phosphoribosylformylglycineamidine	HMDB0000999	440417	C04640	C([C@@H]1[C@H]([C@H]([C@@H](O1)N=C(CNC=O)N)O)O)OP(=O)(O)O
C00170	5'-Methylthioadenosine	HMDB0001173	439176	C00170	CSC[C@@H]1[C@H]([C@H]([C@@H](O1)N2C=NC3=C2N=CN=C3N)O)O
C05638	5-Hydroxykynurenamine	HMDB0004076	164719	C05638	C1=CC(=C(C=C1O)C(=O)CCN)N
C00931	Porphobilinogen	HMDB0000245	1021	C00931	C1=C(C(=C(N1)CN)CC(=O)O)CCC(=O)O
C02730	2-Succinylbenzoate	METPA0322	NA	C02730	NA
C17214	2-(3'-Methylthio)propylmalic acid	METPA1767	NA	C17214	NA
C17215	3-(3'-Methylthio)propylmalic acid	NA	96023623	C17215	NA
C05904	Pelargonidin	HMDB0003263	67249	C05904	C1=CC(=CC=C1C2=C(C=C3C(=CC(=CC3=[O+]2)O)O)O)O.[Cl-]
C17239	p-Hydroxyphenylacetothiohydroximate	METPA1779	NA	C17239	NA
C00761	Coniferin	HMDB0013682	5280372	C00761	COC1=C(C=CC(=C1)/C=C/CO)O[C@H]2[C@@H]([C@H]([C@@H]([C@H](O2)CO)O)O)O
C11870	Gibberellin A8-catabolite	METPA1657	NA	C11870	NA
C00627	Pyridoxine 5'-phosphate	HMDB0001319	1055	C00627	CC1=NC=C(C(=C1O)CO)COP(=O)(O)O
C00534	Pyridoxamine	HMDB0001431	1052	C00534	CC1=NC=C(C(=C1O)CN)CO
C03221	(2E)-Dodecenoyl-CoA	HMDB0003712	5165851	C03221	CCCCCCCCC/C=C/C(=O)SCCNC(=O)CCNC(=O)[C@@H](C(C)(C)COP(=O)([O-])OP(=O)([O-])OC[C@@H]1[C@H]([C@H]([C@@H](O1)N2C=NC3=C2N=CN=C3N)O)OP(=O)([O-])[O-])O
C02139	Chlorophyllide	METPA0252	NA	C02139	NA
C11829	13(1)-Hydroxy-magnesium-protoporphyrin IX 13-monomethyl ester	METPA1059	NA	C11829	NA
C00366	Uric acid	HMDB0000289	1175	C00366	C12=C(NC(=O)N1)NC(=O)NC2=O
C02642	Ureidopropionic acid	HMDB0000026	111	C02642	C(CNC(=O)N)C(=O)O
C00152	L-Asparagine	HMDB0000168	6267	C00152	C([C@@H](C(=O)O)N)C(=O)N
C12206	Caffeyl alcohol	METPA1708	NA	C12206	NA
C00089	Sucrose	HMDB0000258	5988	C00089	C([C@@H]1[C@H]([C@@H]([C@H]([C@H](O1)O[C@]2([C@H]([C@@H]([C@H](O2)CO)O)O)CO)O)O)O)O
C05402	Melibiose	HMDB0000048	440658	C05402	OC[C@H]1O[C@H](OC[C@H]2O[C@H](O)[C@H](O)[C@@H](O)[C@H]2O)[C@@H](O)[C@@H](O)[C@@H]1O
C05400	Isomaltose	HMDB0002923	440656	C05400	OC[C@H]1O[C@H](OC[C@H]2O[C@H](O)[C@H](O)[C@@H](O)[C@H]2O)[C@@H](O)[C@@H](O)[C@@H]1O
C01235	Beta-Cortol	HMDB0005821	246164	C01235	C[C@]12CC[C@H](C[C@H]1CC[C@@H]3[C@@H]2[C@H](C[C@]4([C@H]3CC[C@@]4([C@@H](CO)O)O)C)O)O
C00243	Alpha-Lactose	HMDB0000186	84571	C00243	C([C@@H]1[C@@H]([C@@H]([C@H]([C@@H](O1)O[C@@H]2[C@H](O[C@@H]([C@@H]([C@H]2O)O)O)CO)O)O)O)O
C00185	1-beta-D-Glucopyranosyl-4-D-glucopyranose	MA3TEM061	3485	C00185	C(CC=O)CC=O
C01083	Trehalose	HMDB0000975	7427	C01083	C([C@@H]1[C@H]([C@@H]([C@H]([C@H](O1)O[C@@H]2[C@@H]([C@H]([C@@H]([C@H](O2)CO)O)O)O)O)O)O)O
C00208	D-Maltose	HMDB0000163	10991489	C00208	C([C@@H]1[C@H]([C@@H]([C@H]([C@H](O1)O[C@@H]2[C@H](O[C@@H]([C@H]([C@H]2O)O)O)CO)O)O)O)O
C00082	L-Tyrosine	HMDB0000158	6057	C00082	C1=CC(=CC=C1C[C@@H](C(=O)O)N)O
C00108	2-Aminobenzoic acid	HMDB0001123	227	C00108	C1=CC=C(C(=C1)C(=O)O)N
C19712	N-Hydroxy-L-phenylalanine	NA	135626180	C19712	NA
C00568	p-Aminobenzoic acid	HMDB0001392	978	C00568	C1=CC(=CC=C1C(=O)O)N
C04350	(E)-4-Hydroxyphenylacetaldehyde oxime	NA	6999	C04350	NA
C15976	2-Methyl-1-hydroxypropyl-ThPP	HMDB0006866	23724626	C15976	CC1=C(SC(=[N+]1CC2=CN=C(N=C2N)C)C(C(C)C)O)CCOP(=O)(O)OP(=O)(O)O
C00262	Hypoxanthine	HMDB0000157	790	C00262	C1=NC2=C(N1)C(=O)N=CN2
C00257	Gluconic acid	HMDB0000625	10690	C00257	C([C@H]([C@H]([C@@H]([C@H](C(=O)O)O)O)O)O)O
C00437	N-Acetylornithine	HMDB0003357	439232	C00437	CC(=O)N[C@@H](CCCN)C(=O)O
C16358	1-Methylxanthine	HMDB0010738	80220	C16358	CN1C(=O)C2=C(NC1=O)N=CN2
C16353	7-Methylxanthine	HMDB0001991	68374	C16353	CN1C=NC2=C1C(=O)NC(=O)N2
C16360	3,7-Dimethyluric acid	HMDB0001982	83126	C16360	CN1C2=C(NC1=O)N(C(=O)NC2=O)C
C16356	1,7-Dimethyluric acid	HMDB0011103	91611	C16356	CN1C2=C(NC1=O)NC(=O)N(C2=O)C
C00680	meso-2,6-Diaminoheptanedioate	HMDB0001370	99290	C00680	N[C@@H](CCC[C@H](N)C(O)=O)C(O)=O
C17222	2-(5'-Methylthio)pentylmalic acid	METPA1769	NA	C17222	NA
C17223	3-(5'-Methylthio)pentylmalic acid	NA	96023631	C17223	NA
C15978	2-Methyl-1-hydroxybutyl-ThPP	HMDB0012310	23724627	C15978	CC[C@H](C)C(C1=[N+](C(=C(S1)CCOP(=O)(O)OP(=O)(O)O)C)CC2=CN=C(N=C2N)C)O
C15974	3-Methyl-1-hydroxybutyl-ThPP	HMDB0006865	23724625	C15974	CC1=C(SC(=[N+]1CC2=CN=C(N=C2N)C)C(CC(C)C)O)CCOP(=O)(O)OP(=O)(O)O
C05837	Glucobrassicin	NA	8130	C05837	NA
C16362	3,6,8-Trimethylallantoin	METPA1295	NA	C16362	NA
C09762	(2S)-Liquiritigenin	HMDB0029519	1889	C09762	C1C(OC2=C(C1=O)C=CC(=C2)O)C3=CC=C(C=C3)O
C09827	(S)-Pinocembrin	HMDB0030808	238782	C09827	C1C(OC2=CC(=CC(=C2C1=O)O)O)C3=CC=CC=C3
C16404	Pinocembrin chalcone	METPA1721	NA	C16404	NA
C08650	Isoliquiritigenin	HMDB0037316	638278	C08650	OC1=CC=C(\C=C\C(=O)C2=C(O)C=C(O)C=C2)C=C1
C15968	Adonixanthin	METPA1681	NA	C15968	NA
C16519	2-Succinyl-5-enolpyruvyl-6-hydroxy-3-cyclohexene-1-carboxylate	METPA1312	NA	C16519	NA
C00643	5-Hydroxy-L-tryptophan	HMDB0000472	144	C00643	C1=CC2=C(C=C1O)C(=CN2)CC(C(=O)O)N
C00463	Indole	HMDB0000738	798	C00463	C1=CC=C2C(=C1)C=CN2
C16688	Sucrose-6-phosphate	METPA1419	NA	C16688	NA
C02591	Sucrose 6-phosphate	METPA0307	NA	C02591	NA
C00689	Trehalose 6-phosphate	HMDB0001124	122336	C00689	C([C@@H]1[C@H]([C@@H]([C@H]([C@H](O1)O[C@@H]2[C@@H]([C@H]([C@@H]([C@H](O2)COP(=O)(O)O)O)O)O)O)O)O)O
C11355	4-Amino-4-deoxychorismate	METPA0993	NA	C11355	NA
C01040	L-Gulonolactone	HMDB0003466	439373	C01040	C([C@@H]([C@@H]1[C@@H]([C@@H](C(=O)O1)O)O)O)O
C01115	L-Galactono-1,4-lactone	METPA0133	NA	C01115	NA
C02514	3-Fumarylpyruvate	HMDB0060371	5280525	C02514	OC(=O)\C=C\C(=O)CC(=O)C(O)=O
C01081	Thiamine monophosphate	HMDB0002666	3382778	C01081	CC1=C(SC=[N+]1CC2=CN=C(N=C2N)C)CCOP(=O)(O)[O-]
C00438	Ureidosuccinic acid	HMDB0000828	93072	C00438	C([C@@H](C(=O)O)NC(=O)N)C(=O)O
C00143	5,10-Methylene-THF	HMDB0001533	439175	C00143	C1[C@@H]2CN(CN2C3=C(N1)NC(=NC3=O)N)C4=CC=C(C=C4)C(=O)NC(CCC(=O)O)C(=O)O
C08579	Antheraxanthin	METPA0963	NA	C08579	NA
C05401	Galactosylglycerol	HMDB0006790	656504	C05401	C([C@@H]1[C@@H]([C@@H]([C@H]([C@@H](O1)OCC(CO)O)O)O)O)O
[truncated: 29 more columns]
