# Supplementary material for: Metabolomic Aspects of Conservative and Resistance-related Elements of Response to <em>Fusarium culmorum</em> in the Grass Family
Source: Preprints.org preprint supplement (doi:10.20944/preprints202207.0378.v1), 2022-07-26
Supplement: Supplementary file 4 [file table S4.xlsx]

## Sheet: MSEA structural enrichment
common T1	hits	FDR	common T2	hits	FDR	Hs T1	hits	FDR	Hs T2	hits	FDR	Hr T1	hits	FDR	Hr T1	hits	FDR	Ts T1	hits	FDR	Ts T2	hits	FDR	Tr T1	hits	FDR	Tr T2	hits	FDR	Bd21 T1	hits	FDR		hits	FDR
Benzamides	56	5.42e-57	Benzamides	96	2.21e-110	Benzamides	11	1.44e-09	Monosaccharides	3	0.000133	Amino acids and peptides	6	2.07e-08	Purines	4	4.55e-09	Purines	7	1.24e-11	Benzamides	32	3.11e-33	Benzamides	20	2.54e-21	Benzamides	5	0.00218	Monosaccharides	9	2.34e-18	Benzamides	16	1.07e-17
Monosaccharides	14	9.23e-22	Purines	16	1.21e-24	Amino acids and peptides	6	3.27e-05	Disaccharides	2	0.000133	Benzamides	4	0.00159	Indoles	1	0.265	Benzamides	14	1.24e-11	Amino acids and peptides	10	7.42e-08	Purines	4	1.18e-05	Eicosanoids	3	0.0817	Benzamides	12	1.6e-12	Purines	5	1.73e-08
Amino acids and peptides	23	4.1e-21	Amino acids and peptides	20	9.89e-15	Porphyrins	2	0.000154	Purines	2	0.00953	Oligosaccharides	1	0.0574	Benzamides	2	0.279	Monosaccharides	7	1.24e-11	Monosaccharides	5	1.68e-06	Monosaccharides	4	1.18e-05	Pyridinecarboxylic acids	1	0.0817	TCA acids	3	1.53e-07	Pyrimidines	3	0.000213
Purines	9	1.48e-12	Monosaccharides	9	4.09e-11	TCA acids	2	0.000277	Tetrapyrroles	1	0.0323	Cinnamic acids	1	0.123	Sphingoid bases	1	0.36	TCA acids	2	0.000655	Quinones and hydroquinones	4	1.5e-05	Imidazoles	2	0.000853	Oligosaccharides	1	0.0817	Purines	3	0.000142	Phenylpropanoids	2	0.00232
Porphyrins	4	3.99e-09	Isoprenoids	21	1.72e-10	Monosaccharides	3	0.000308	Cyclic alcohols	1	0.0344	Fatty Acids and Conjugates	2	1	Amino acids and peptides	1	1	Imidazoles	2	0.000959	Sterols	8	2.75e-05	Cinnamic acids	2	0.00196	Fatty Acids and Conjugates	4	0.138	Phosphate esters	2	0.000142	Thiazoles	1	0.0325
TCA acids	4	2.79e-08	Indoles	6	5.16e-09	Isoprenoids	5	0.00662	Aldehydes	1	0.117				Isoprenoids	1	1	Amino acids and peptides	5	0.0022	Cyclic alcohols	2	0.000161	Isoprenoids	6	0.00226	Glycosyl compounds	1	0.148	Amino acids and peptides	3	0.0495	Carboximidic acids	1	0.0406
Pyrimidines	6	1.02e-07	Porphyrins	4	8.82e-09	Linear diarylheptanoids	1	0.0374	Glycosyl compounds	1	0.117							Indoles	2	0.00648	Tryptamines	2	0.00023	Eicosanoids	5	0.0037	Prenol lipids	2	1	Glycosyl compounds	1	0.183	Cyclic alcohols	1	0.0406
Cinnamic acids	4	7.93e-07	Pyrimidines	7	9.78e-09	Tryptamines	1	0.0545	Organooxygen compounds	1	0.374							Eicosanoids	5	0.00717	Isoprenoids	8	0.00076	Flavonoids	10	0.00547	Octadecanoids	1	1	Amines	1	0.183	Phenylacetaldehydes	1	0.0406
Sphingoid bases	5	1.36e-05	Glycosyl compounds	4	1.74e-06	Fatty Acids and Conjugates	5	0.135	Fatty Acids and Conjugates	3	0.461							Organooxygen compounds	2	0.0191	Benzoic acids	3	0.000899	Pyridine carboxaldehydes	1	0.0452	Amino acids and peptides	1	1	Indoles	1	0.279	Amino acids and peptides	3	0.0504
Pyridoxamines	2	5.74e-05	Cinnamic acids	4	1.95e-06	Eicosanoids	3	0.135	Isoprenoids	2	0.619							Benzoic acids	2	0.0192	Pyrimidines	3	0.000947	Cyclic alcohols	1	0.0452	Isoprenoids	1	1	Fatty Acids and Conjugates	3	1	Imidazoles	1	0.0972
Benzenes	5	9.37e-05	TCA acids	3	1.55e-05	Cinnamic acids	1	0.152	Fatty Acyls	2	0.619							Pyridoxamines	1	0.0244	Fatty Acids and Conjugates	11	0.00117	Tryptamines	1	0.0514	Fatty Acyls	1	1	Bile acids	1	1	Phenylacetic acids	1	0.11
Fatty Acids and Conjugates	17	0.000161	Sphingoid bases	5	4.03e-05	Alcohols and polyols	1	0.152	Octadecanoids	1	1							Fatty Acids and Conjugates	7	0.0334	Purines	3	0.00117	Glycosyl compounds	1	0.178	Flavonoids	1	1	Octadecanoids	1	1	Glycosyl compounds	1	0.128
Short-chain acids and derivatives	2	0.000923	Benzenediols	3	8.63e-05	Organic dicarboxylic acids	1	0.154	Amino acids and peptides	1	1							Pyridine carboxaldehydes	1	0.0383	Cinnamic acids	2	0.00234	Octadecanoids	2	0.426				Isoprenoids	1	1	Alcohols and polyols	1	0.131
Isoprenoids	10	0.00137	Tryptamines	2	0.000718	Prenol lipids	4	0.208	Benzamides	1	1							Phenylacetaldehydes	1	0.0383	Eicosanoids	6	0.00316	Phenols	1	0.486				Fatty Acyls	1	1	Isoprenoids	3	0.208
Disaccharides	2	0.00137	Disaccharides	2	0.0024	Phenols	1	0.351	Prenol lipids	1	1							Prenol lipids	6	0.0406	Cholines	1	0.053	Amino acids and peptides	2	0.728				Prenol lipids	1	1	Aromatic polyketides	1	0.484
Benzenediols	2	0.00425	Eicosanoids	9	0.0036	Purines	1	0.478	Flavonoids	1	1							Aminosaccharides	1	0.0585	Beta-keto acids	1	0.094	Fatty Acids and Conjugates	4	0.851							Monosaccharides	1	0.484
Phenylpropanoids	2	0.0116	Imidazoles	2	0.00374	Octadecanoids	1	1										Isoprenoids	4	0.111	Disaccharides	1	0.094	Prenol lipids	2	1							Octadecanoids	1	1
Indoles	2	0.0194	Phenols	3	0.00374	Flavonoids	1	1										Phenylacetic acids	1	0.111	TCA acids	1	0.094	Fatty Acyls	1	1							Prenol lipids	2	1
Quinones and hydroquinones	2	0.0535	Organooxygen compounds	3	0.00532													Cinnamic acids	1	0.14	Benzimidazoles	1	0.094										Flavonoids	3	1
Pyridoxines	1	0.0535	Aldehydes	2	0.00755													Pyridines	1	0.193	Octadecanoids	3	0.0992										Fatty Acyls	1	1
Tetrapyrroles	1	0.0535	Organic dicarboxylic acids	2	0.0118													Phenols	1	0.377	Benzenediols	1	0.151										Fatty Acids and Conjugates	1	1
Organooxygen compounds	2	0.0554	Pyridines	2	0.0179													Quinones and hydroquinones	1	0.377	Aldehydes	1	0.162
Carboximidic acids	1	0.0554	Gamma-keto acids	1	0.0413													Pyrimidines	1	0.445	Glycosyl compounds	1	0.163
Furanones	1	0.0554	Pyridoxamines	1	0.0413													Benzenes	1	0.81	Amines	1	0.166
Cholines	1	0.0554	Fatty Acids and Conjugates	14	0.0484													Bile acids	1	1	Alcohols and polyols	1	0.166
Cyclic alcohols	1	0.0554	Pyridoxines	1	0.0551													Fatty Acyls	1	1	Pyridines	1	0.22
Phenylacetaldehydes	1	0.0554	Tetrapyrroles	1	0.0551													Flavonoids	2	1	Indoles	1	0.262
Tryptamines	1	0.0668	Carboximidic acids	1	0.066																Fatty Acyls	4	0.291
Flavonoids	16	0.0726	Furanones	1	0.066																Organooxygen compounds	1	0.468
Aminosaccharides	1	0.0843	Cyclic alcohols	1	0.066																Aromatic polyketides	1	0.607
Oligosaccharides	1	0.0843	Benzoic acids	2	0.0798																Benzenes	1	0.913
Prenol lipids	9	0.115	Prenol lipids	11	0.102																Prenol lipids	4	1
Organic phosphoric acids	1	0.124	Oligosaccharides	1	0.105																Steroids	1	1
Keto acids	1	0.131	Phosphate esters	1	0.13																Flavonoids	3	1
Eicosanoids	5	0.135	Keto acids	1	0.164																Glycerophosphocholines	1	1
Fatty amines	1	0.144	Pterins	1	0.164
Phenylacetic acids	1	0.15	Heterocyclic compounds	1	0.225
Aldehydes	1	0.175	Benzenes	2	0.246
Amines	1	0.194	Amines	1	0.256
Alcohols and polyols	1	0.194	Alcohols and polyols	1	0.256
Organic dicarboxylic acids	1	0.207	Ketones	1	0.261
Phenols	1	0.52	Phenylpropanoids	1	0.311
Fatty aldehydes	1	0.595	Octadecanoids	3	0.468
Aromatic polyketides	1	0.754	Quinones and hydroquinones	1	0.668
Sterols	3	0.765	Flavonoids	14	1
Bile acids	1	1	Fatty Acyls	4	1
Fatty Acyls	3	1	Sterols	2	1
Steroids	2	1	Steroids	2	1
Octadecanoids	1	1	Fatty esters	1	1
Fatty esters	1	1
