# Supplementary material for: Metabolomic Aspects of Conservative and Resistance-related Elements of Response to <em>Fusarium culmorum</em> in the Grass Family
Source: Preprints.org preprint supplement (doi:10.20944/preprints202207.0378.v1), 2022-07-26
Supplement: Supplementary file 5 [file table S5.xlsx]

## Sheet: expession
		expression	expression SD	corected expression SD	Mean Cq	Cq SD	p-value
	Tri 5	0.00091	0.00035	0.00035	33.94	0.52214	0.000852
	Zea2	0.11019	0.042	0.042	29.77	0.25774	0.000105
	Tri 6	0.00783	0.00707	0.00707	33.04	1.2664	6.4e-05
